# Supplementary material for: Syntheses of 3H-1,2,4-triazol-3-ones by copper-promoted oxidative N–N bond formation of amidines with isocyanates
Source: Royal Society of Chemistry journal article supplement (doi:10.1039/d3qo01565c), 2023-11-21

## Supporting Information

### Syntheses of 3*H*-1,2,4-Triazol-3-ones by Copper-Promoted Oxidative N-N Bond Formation of Amidines with Isocyanates

Baihui Liang,<sup>a</sup> Xiangya Cai,<sup>a</sup> JingYu Liu,<sup>a</sup> Wei Li,<sup>a</sup> Jie Huang,<sup>a</sup> Youzhi Chen,<sup>a</sup>  
Haiyin Deng,<sup>a</sup> Quanquan Zhou,<sup>b</sup> Tianxiang Chen,<sup>c</sup> Xiuwen Chen,<sup>a</sup> Zhongzhi Zhu<sup>a</sup>

<sup>a</sup>School of Biotechnology and Health Sciences, Wuyi University, Jiangmen, 529020,  
China.

E-mail: zhongzhi\_zhu@126.com, chenxiuwen2010@126.com.

<sup>b</sup>Institute of Advanced Materials (IAM), Jiangxi Normal University, Nanchang, Jiangxi  
Province, 330022, P. R. of China.

E-mail: quanquan.zhou@jxnu.edu.cn.

<sup>c</sup>Department of Applied Biology and Chemical Technology, The Hong Kong  
Polytechnic University, Hong Kong (China)

#### Table of contents

|                                                                  |         |
|------------------------------------------------------------------|---------|
| 1. General information                                           | S2      |
| 2. Typical procedure for the synthesis of <b>3</b> and <b>5a</b> | S2      |
| 3. Characterization data for all compounds                       | S3-S16  |
| 4. Gram-scale reaction and further transformations of <b>3aa</b> | S16     |
| 5. NMR spectra of the obtained compounds                         | S17-S53 |

## 1. General information

All the obtained products were characterized by melting points (m.p),  $^1\text{H-NMR}$  and  $^{13}\text{C-NMR}$ . Melting points were measured on an Electrothermal SGW-X4 microscopy digital melting point apparatus and are uncorrected;  $^1\text{H-NMR}$  and  $^{13}\text{C-NMR}$  spectra were obtained on Bruker-500 and referenced to 7.28 ppm and 77.16 ppm for chloroform solvent with TMS as internal standard (0 ppm). Chemical shifts were reported in parts per million (ppm,  $\delta$ ) downfield from tetramethylsilane. Proton coupling patterns are described as singlet (s), doublet (d), triplet (t), multiplet (m); TLC was performed using commercially prepared 100-400 mesh silica gel plates (GF254), and visualization was effected at 254 nm; Unless otherwise stated, all the reagents were purchased from commercial sources (Energy chemical, J&K Chemic, TCI, Fluka, Acros, SCRC), used without further purification. Mass spectroscopy data of the products were collected on an HRMS-TOF instrument.

## 2. Typical procedure for the synthesis of **3** and **5a**

### Synthetic procedure for **3**

Isocyanate **1** (0.2 mmol), amidine hydrochloride **2** (0.2 mmol),  $\text{Cu}(\text{OAc})_2$  (0.4 mmol), TBAI (0.2 mmol) and DMSO (2 mL) were introduced in a Schlenk tube, successively. Then the Schlenk tube was closed and the resulting mixture was stirred at 80 °C by heating the mantle for 12 h. The combined filtrate was concentrated and purified by a flash column chromatography (EtOAc/petroleumether) on silica gel to afford the products **3**.

### Synthetic procedure for **5a**

Isocyanate **1a** (0.2 mmol), amidine hydrochloride **2a** (0.2 mmol),  $\text{Cu}(\text{OAc})_2$  (0.02 mmol), TBAI (0.2 mmol) and DMSO (2 mL) were introduced in a Schlenk tube, successively. Then the Schlenk tube was closed and the resulting mixture was stirred at 80 °C by heating the mantle for 4 h. The combined filtrate was concentrated and purified by a flash column chromatography (EtOAc/petroleumether) on silica gel to afford the products **5a**.

### 3. Characterization data for all compounds

(1)

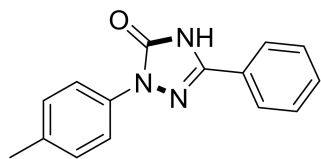

**5-Phenyl-2-(*p*-tolyl)-2,4-dihydro-3H-1,2,4-triazol-3-one (3aa):** yellow solid (43.7 mg, 86% yield); mp: 200.0-201.0 °C;  $R_f$  = 0.3 (petroleum ether: ethyl acetate = 3: 1);  $^1\text{H}$  NMR (500 MHz,  $\text{DMSO-}d_6$ )  $\delta$  12.65 (s, 1H), 7.92 (dd,  $J$  = 7.6, 2.1 Hz, 2H), 7.90 – 7.85 (m, 2H), 7.57 – 7.51 (m, 3H), 7.29 (d,  $J$  = 8.3 Hz, 2H), 2.33 (s, 3H).  $^{13}\text{C}$  NMR (126 MHz,  $\text{DMSO-}d_6$ )  $\delta$  153.3, 145.0, 135.9, 134.6, 131.0, 129.9, 129.5, 126.7, 125.7, 118.5, 21.0. HRMS (ESI)  $m/z$ : calcd for  $\text{C}_{15}\text{H}_{14}\text{N}_3$   $[\text{M}+\text{H}]^+$  252.1131; found 252.1131. HRMS (ESI)  $m/z$ : calcd for  $\text{C}_{15}\text{H}_{13}\text{N}_3\text{ONa}$   $[\text{M}+\text{Na}]^+$  274.0950; found 274.0945.

(2)

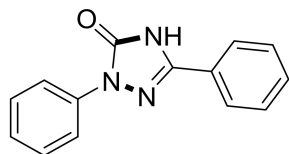

**2,5-Diphenyl-2,4-dihydro-3H-1,2,4-triazol-3-one (3ab):** yellow solid (41.7 mg, 88% yield); mp: 190.9-191.9 °C;  $R_f$  = 0.3 (petroleum ether: ethyl acetate = 3: 1);  $^1\text{H}$  NMR (500 MHz,  $\text{DMSO-}d_6$ )  $\delta$  12.69 (s, 1H), 8.00 (d,  $J$  = 8.0 Hz, 2H), 7.97 – 7.89 (m, 2H), 7.61 – 7.52 (m, 3H), 7.49 (t,  $J$  = 7.9 Hz, 2H), 7.25 (t,  $J$  = 7.4 Hz, 1H).  $^{13}\text{C}$  NMR (126 MHz,  $\text{DMSO-}d_6$ )  $\delta$  153.4, 145.3, 138.3, 131.1, 129.5, 129.5, 126.6, 125.8, 125.4, 118.5. HRMS (ESI)  $m/z$ : calcd for  $\text{C}_{14}\text{H}_{11}\text{N}_3\text{ONa}$   $[\text{M}+\text{Na}]^+$  260.0794; found 260.0790.

(3)

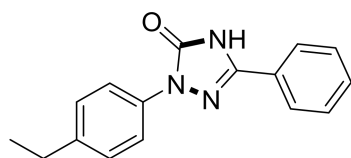

**2-(4-Ethylphenyl)-5-phenyl-2,4-dihydro-3H-1,2,4-triazol-3-one (3ac):** yellow solid (39.9 mg, 75% yield); mp: 230.8-231.8 °C;  $R_f$  = 0.3 (petroleum ether: ethyl acetate = 3:

1);  $^1\text{H}$  NMR (500 MHz,  $\text{DMSO-}d_6$ )  $\delta$  12.65 (s, 1H), 7.96 – 7.84 (m, 4H), 7.57 – 7.50 (m, 3H), 7.35 – 7.27 (m, 2H), 2.63 (m,  $J = 7.6$  Hz, 2H), 1.20 (t,  $J = 7.6$  Hz, 3H).  $^{13}\text{C}$  NMR (126 MHz,  $\text{DMSO-}d_6$ )  $\delta$  153.3, 145.0, 141.0, 136.1, 131.0, 129.5, 128.7, 126.7, 125.7, 118.7, 28.1, 16.1. HRMS (ESI)  $m/z$ : calcd for  $\text{C}_{16}\text{H}_{15}\text{N}_3\text{ONa}$   $[\text{M}+\text{Na}]^+$  288.1107; found 288.1102.

(4)

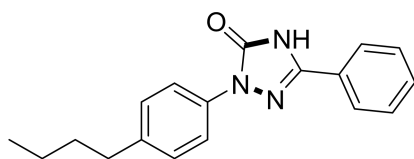

**2-(4-Butylphenyl)-5-phenyl-2,4-dihydro-3H-1,2,4-triazol-3-one (3ad)**: yellow solid (38.1 mg, 65% yield); mp: 150.0-151.0 °C;  $R_f = 0.3$  (petroleum ether: ethyl acetate = 3: 1);  $^1\text{H}$  NMR (500 MHz,  $\text{DMSO-}d_6$ )  $\delta$  12.65 (s, 1H), 7.93 – 7.90 (m, 2H), 7.90 – 7.86 (m, 2H), 7.57 – 7.51 (m, 3H), 7.30 – 7.25 (m, 2H), 2.59 (t,  $J = 7.7$  Hz, 2H), 1.59 – 1.52 (m, 2H), 1.35 – 1.26 (m, 2H), 0.90 (t,  $J = 7.4$  Hz, 3H).  $^{13}\text{C}$  NMR (126 MHz,  $\text{DMSO-}d_6$ )  $\delta$  153.3, 145.0, 139.5, 136.1, 131.0, 129.5, 129.2, 126.7, 125.7, 118.6, 34.7, 33.6, 22.2, 14.2. HRMS (ESI)  $m/z$ : calcd for  $\text{C}_{18}\text{H}_{19}\text{N}_3\text{ONa}$   $[\text{M}+\text{Na}]^+$  316.1420; found 316.1415.

(5)

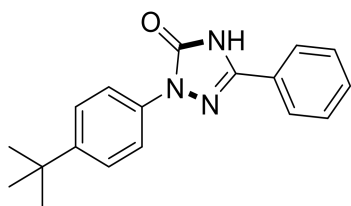

**2-(4-(tert-Butyl)phenyl)-5-phenyl-2,4-dihydro-3H-1,2,4-triazol-3-one (3ae)**: yellow solid (43.9 mg, 75% yield); mp: 236.4-237.4 °C;  $R_f = 0.3$  (petroleum ether: ethyl acetate = 3: 1);  $^1\text{H}$  NMR (500 MHz,  $\text{DMSO-}d_6$ )  $\delta$  12.64 (s, 1H), 7.93 – 7.87 (m, 4H), 7.57 – 7.52 (m, 3H), 7.51 – 7.47 (m, 2H), 1.31 (s, 9H).  $^{13}\text{C}$  NMR (126 MHz,  $\text{DMSO-}d_6$ )  $\delta$  153.3, 147.9, 145.1, 135.8, 131.0, 129.5, 126.7, 126.1, 125.7, 118.4, 34.7, 31.6. HRMS (ESI)  $m/z$ : calcd for  $\text{C}_{18}\text{H}_{19}\text{N}_3\text{ONa}$   $[\text{M}+\text{Na}]^+$  316.1420; found 316.1417.

(6)

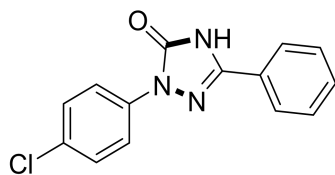

**2-(4-Chlorophenyl)-5-phenyl-2,4-dihydro-3H-1,2,4-triazol-3-one (3af):** yellow solid (45.0 mg, 83% yield); mp: 284.0-285.0 °C;  $R_f = 0.3$  (petroleum ether: ethyl acetate = 3: 1);  $^1\text{H NMR}$  (500 MHz,  $\text{DMSO-}d_6$ )  $\delta$  12.76 (s, 1H), 8.03 (d,  $J = 8.9$  Hz, 2H), 7.97 – 7.88 (m, 2H), 7.55 (dt,  $J = 6.4, 3.2$  Hz, 5H).  $^{13}\text{C NMR}$  (126 MHz,  $\text{DMSO-}d_6$ )  $\delta$  153.3, 145.6, 137.1, 131.2, 129.6, 129.5, 129.2, 126.5, 125.8, 119.9. HRMS (ESI)  $m/z$ : calcd for  $\text{C}_{14}\text{H}_{10}\text{ClN}_3\text{ONa}$   $[\text{M}+\text{Na}]^+$  294.0404; found 294.0400.

(7)

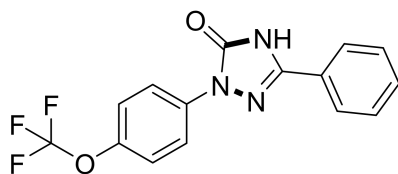

**5-Phenyl-2-(4-(trifluoromethoxy)phenyl)-2,4-dihydro-3H-1,2,4-triazol-3-one (3ag):** yellow solid (50.7 mg, 79% yield); mp: 210.0-211.0 °C;  $R_f = 0.3$  (petroleum ether: ethyl acetate = 3: 1);  $^1\text{H NMR}$  (500 MHz,  $\text{DMSO-}d_6$ )  $\delta$  12.78 (s, 1H), 8.17 – 8.08 (m, 2H), 7.97 – 7.89 (m, 2H), 7.56 (dd,  $J = 5.2, 2.0$  Hz, 3H), 7.50 (d,  $J = 8.5$  Hz, 2H).  $^{13}\text{C NMR}$  (126 MHz,  $\text{DMSO-}d_6$ )  $\delta$  153.4, 145.7, 145.3, 137.3, 131.3, 129.6, 126.5, 125.8, 122.4, 120.6 (q,  $J = 255.9$  Hz), 119.9.  $^{19}\text{F NMR}$  (471 MHz,  $\text{DMSO-}d_6$ )  $\delta$  -57.01. HRMS (ESI)  $m/z$ : calcd for  $\text{C}_{15}\text{H}_{10}\text{F}_3\text{N}_3\text{O}_2\text{Na}$   $[\text{M}+\text{Na}]^+$  344.0617; found 344.0613.

(8)

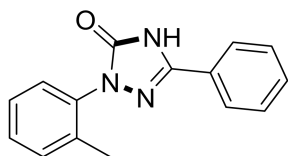

**5-Phenyl-2-(o-tolyl)-2,4-dihydro-3H-1,2,4-triazol-3-one (3ah):** yellow solid (23.1 mg, 46% yield);  $R_f = 0.3$  (petroleum ether: ethyl acetate = 3: 1);  $^1\text{H NMR}$  (500 MHz,

DMSO-*d*<sub>6</sub>)  $\delta$  12.50 (s, 1H), 7.89 – 7.83 (m, 2H), 7.56 – 7.49 (m, 3H), 7.42 – 7.30 (m, 4H), 2.27 (s, 3H). <sup>13</sup>C NMR (126 MHz, DMSO-*d*<sub>6</sub>)  $\delta$  192.1 – 188.7 (m), 153.9, 145.3, 136.1, 135.2, 131.3, 130.8, 129.5, 128.9, 127.6, 127.0, 125.5, 18.3. HRMS (ESI) *m/z*: calcd for C<sub>15</sub>H<sub>13</sub>N<sub>3</sub>ONa [M+Na]<sup>+</sup> 274.0950; found 274.0945.

(9)

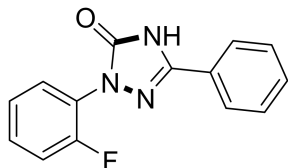

**2-(2-Fluorophenyl)-5-phenyl-2,4-dihydro-3H-1,2,4-triazol-3-one (3ai):** yellow solid (29.6 mg, 58% yield); *R<sub>f</sub>* = 0.3 (petroleum ether: ethyl acetate = 3: 1); <sup>1</sup>H NMR (500 MHz, DMSO-*d*<sub>6</sub>)  $\delta$  12.62 (s, 1H), 7.94 – 7.83 (m, 2H), 7.64 (m, *J* = 7.8, 1.7 Hz, 1H), 7.57 – 7.47 (m, 4H), 7.44 (m, *J* = 10.0, 8.3, 1.4 Hz, 1H), 7.36 (m, *J* = 7.6, 1.4 Hz, 1H). <sup>13</sup>C NMR (126 MHz, DMSO-*d*<sub>6</sub>)  $\delta$  156.6 (d, *J* = 251.4 Hz), 153.9, 146.1, 131.0, 130.6 (d, *J* = 7.7 Hz), 129.5, 128.6, 126.7, 125.6, 125.3 (d, *J* = 3.7 Hz), 124.8 (d, *J* = 11.8 Hz), 117.2 (d, *J* = 19.2 Hz). <sup>19</sup>F NMR (471 MHz, DMSO-*d*<sub>6</sub>)  $\delta$  -120.31. HRMS (ESI) *m/z*: calcd for C<sub>14</sub>H<sub>10</sub>FN<sub>3</sub>ONa [M+Na]<sup>+</sup> 278.0700; found 278.0696.

(10)

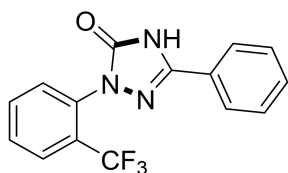

**5-Phenyl-2-(2-(trifluoromethyl)phenyl)-2,4-dihydro-3H-1,2,4-triazol-3-one (3aj):** yellow solid (26.2 mg, 43% yield); mp: 210.0-211.0 °C; *R<sub>f</sub>* = 0.3 (petroleum ether: ethyl acetate = 3: 1); <sup>1</sup>H NMR (500 MHz, DMSO-*d*<sub>6</sub>)  $\delta$  7.93 (dd, *J* = 7.8, 1.5 Hz, 1H), 7.85 (td, *J* = 8.1, 2.0 Hz, 3H), 7.72 (d, *J* = 8.1 Hz, 2H), 7.56 – 7.47 (m, 3H). <sup>13</sup>C NMR (126 MHz, DMSO-*d*<sub>6</sub>)  $\delta$  155.2, 146.3, 134.9, 134.0, 130.9, 130.8, 130.0, 129.5, 127.9 (q, *J* = 5.1 Hz), 127.3, 126.8 (q, *J* = 30.9 Hz), 125.5, 123.7 (q, *J* = 273.5 Hz). <sup>19</sup>F

NMR (471 MHz, DMSO-*d*<sub>6</sub>)  $\delta$  -58.83. HRMS (ESI) *m/z*: calcd for C<sub>15</sub>H<sub>10</sub>F<sub>3</sub>N<sub>3</sub>ONa [M+Na]<sup>+</sup> 328.0668; found 328.0662.

(11)

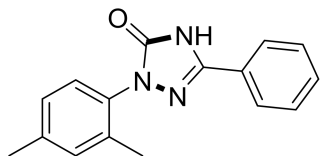

**2-(2,4-Dimethylphenyl)-5-phenyl-2,4-dihydro-3H-1,2,4-triazol-3-one (3ak):**

yellow solid (25.5 mg, 48% yield); mp: 259.8-260.8 °C; *R<sub>f</sub>* = 0.3 (petroleum ether: ethyl acetate = 3: 1); <sup>1</sup>H NMR (500 MHz, DMSO-*d*<sub>6</sub>)  $\delta$  7.89 – 7.80 (m, 2H), 7.55 – 7.47 (m, 3H), 7.26 (d, *J* = 8.0 Hz, 1H), 7.18 (d, *J* = 2.0 Hz, 1H), 7.12 (dd, *J* = 8.0, 2.0 Hz, 1H), 2.34 (s, 3H), 2.21 (s, 3H). <sup>13</sup>C NMR (126 MHz, DMSO-*d*<sub>6</sub>)  $\delta$  154.3, 145.4, 138.3, 135.0, 133.8, 131.7, 130.7, 129.5, 127.5, 127.4, 127.2, 125.4, 21.1, 18.2. HRMS (ESI) *m/z*: calcd for C<sub>16</sub>H<sub>15</sub>N<sub>3</sub>ONa [M+Na]<sup>+</sup> 288.1107; found 288.1100.

(12)

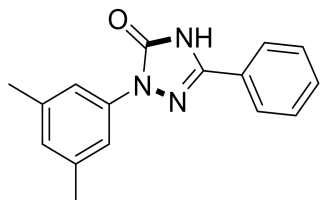

**2-(3,5-Dimethylphenyl)-5-phenyl-2,4-dihydro-3H-1,2,4-triazol-3-one (3al):**

yellow solid (41.3 mg, 78% yield); mp: 191.8-192.8 °C; *R<sub>f</sub>* = 0.3 (petroleum ether: ethyl acetate = 3: 1); <sup>1</sup>H NMR (500 MHz, DMSO-*d*<sub>6</sub>)  $\delta$  12.66 (s, 1H), 7.92 (dd, *J* = 7.6, 2.2 Hz, 2H), 7.64 (d, *J* = 1.6 Hz, 2H), 7.54 (dd, *J* = 5.7, 1.7 Hz, 3H), 6.88 (s, 1H), 2.33 (s, 6H). <sup>13</sup>C NMR (126 MHz, DMSO-*d*<sub>6</sub>)  $\delta$  153.5, 145.2, 138.6, 138.3, 131.0, 129.5, 126.8, 126.8, 125.7, 116.2, 21.6. HRMS (ESI) *m/z*: calcd for C<sub>16</sub>H<sub>15</sub>N<sub>3</sub>ONa [M+Na]<sup>+</sup> 288.1107; found 288.1103.

(13)

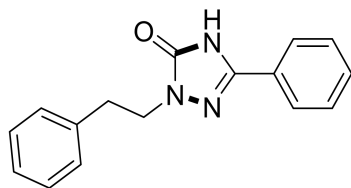

**2-Phenethyl-5-phenyl-2,4-dihydro-3H-1,2,4-triazol-3-one (3am):** yellow solid (43.5 mg, 82% yield); mp: 168.1-169.1 °C;  $R_f$  = 0.3 (petroleum ether: ethyl acetate = 3: 1);  $^1\text{H}$  NMR (500 MHz,  $\text{DMSO-}d_6$ )  $\delta$  12.19 (s, 1H), 7.84 – 7.76 (m, 2H), 7.53 – 7.44 (m, 3H), 7.28 (dd,  $J$  = 8.0, 6.8 Hz, 2H), 7.24 – 7.18 (m, 3H), 3.95 (dd,  $J$  = 8.0, 6.7 Hz, 2H), 3.02 (t,  $J$  = 7.3 Hz, 2H).  $^{13}\text{C}$  NMR (126 MHz,  $\text{DMSO-}d_6$ )  $\delta$  154.7, 143.9, 138.8, 130.5, 129.4, 129.1, 128.8, 127.2, 126.8, 125.3, 45.7, 34.7. HRMS (ESI)  $m/z$ : calcd for  $\text{C}_{16}\text{H}_{15}\text{N}_3\text{O}$   $[M+\text{Na}]^+$  288.1107; found 288.1099.

(14)

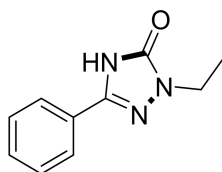

**2-Ethyl-5-phenyl-2,4-dihydro-3H-1,2,4-triazol-3-one (3an):** yellow solid (32.1 mg, 83% yield); mp: 180.0-181.0 °C;  $R_f$  = 0.3 (petroleum ether: ethyl acetate = 3: 1);  $^1\text{H}$  NMR (500 MHz,  $\text{DMSO-}d_6$ )  $\delta$  12.21 (s, 1H), 7.85 - 7.74 (m, 2H), 7.54 - 7.39 (m, 3H), 3.75 (m,  $J$  = 7.2 Hz, 2H), 1.25 (t,  $J$  = 7.2 Hz, 3H).  $^{13}\text{C}$  NMR (126 MHz,  $\text{DMSO-}d_6$ )  $\delta$  154.4, 143.8, 130.4, 129.4, 127.2, 125.2, 39.5, 14.5. HRMS (ESI)  $m/z$ : calcd for  $\text{C}_{10}\text{H}_{12}\text{N}_3\text{O}$   $[M+\text{Na}]^+$  212.0794; found 212.0791.

(15)

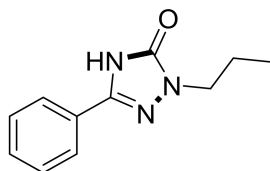

**5-Phenyl-2-propyl-2,4-dihydro-3H-1,2,4-triazol-3-one (3ao):** yellow solid (34.5 mg, 85% yield); mp: 175.1-176.1 °C;  $R_f$  = 0.3 (petroleum ether: ethyl acetate = 3: 1);  $^1\text{H}$  NMR (500 MHz,  $\text{DMSO-}d_6$ )  $\delta$  12.20 (s, 1H), 7.85 – 7.73 (m, 2H), 7.56 – 7.39 (m, 3H),



3.67 (t,  $J = 7.0$  Hz, 2H), 1.70 (m,  $J = 7.2$  Hz, 2H), 0.88 (t,  $J = 7.4$  Hz, 3H).  $^{13}\text{C}$  NMR (126 MHz,  $\text{DMSO-}d_6$ )  $\delta$  154.8, 143.8, 130.4, 129.4, 127.2, 125.2, 46.1, 22.2, 11.4. HRMS (ESI)  $m/z$ : calcd for  $\text{C}_{11}\text{H}_{13}\text{N}_3\text{ONa}$   $[\text{M}+\text{Na}]^+$  226.0950; found 226.0946.

(16)

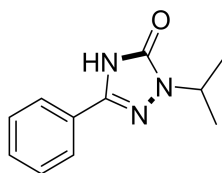

**2-Isopropyl-5-phenyl-2,4-dihydro-3H-1,2,4-triazol-3-one (3ap)**: yellow solid (32.9 mg, 81% yield); mp: 209.5-210.5 °C;  $R_f = 0.3$  (petroleum ether: ethyl acetate = 3: 1);  $^1\text{H}$  NMR (500 MHz,  $\text{DMSO-}d_6$ )  $\delta$  12.17 (s, 1H), 7.83 – 7.77 (m, 2H), 7.51 – 7.43 (m, 3H), 4.35 (p,  $J = 6.7$  Hz, 1H), 1.31 (d,  $J = 6.7$  Hz, 6H).  $^{13}\text{C}$  NMR (126 MHz,  $\text{DMSO-}d_6$ )  $\delta$  154.0, 143.8, 130.3, 129.4, 127.3, 125.2, 45.9, 21.6. HRMS (ESI)  $m/z$ : calcd for  $\text{C}_{11}\text{H}_{13}\text{N}_3\text{ONa}$   $[\text{M}+\text{Na}]^+$  226.0950; found 226.0947.

(17)

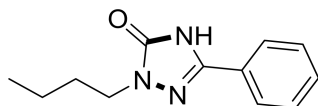

**2-Butyl-5-phenyl-2,4-dihydro-3H-1,2,4-triazol-3-one (3aq)**: yellow solid (33.4 mg, 77% yield); mp 212.6-213.6 °C;  $R_f = 0.3$  (petroleum ether: ethyl acetate = 3: 1);  $^1\text{H}$  NMR (500 MHz,  $\text{Chloroform-}d$ )  $\delta$  10.98 (s, 1H), 7.92 – 7.83 (m, 2H), 7.44 (dd,  $J = 9.2, 7.1$  Hz, 3H), 3.90 (t,  $J = 7.2$  Hz, 2H), 1.83 (m,  $J = 7.3$  Hz, 2H), 1.43 (m,  $J = 7.5$  Hz, 2H), 0.98 (t,  $J = 7.4$  Hz, 3H).  $^{13}\text{C}$  NMR (126 MHz,  $\text{Chloroform-}d$ )  $\delta$  156.3, 145.0, 130.0, 128.9, 126.8, 125.2, 44.9, 30.9, 19.8, 13.7. HRMS (ESI)  $m/z$ : calcd for  $\text{C}_{12}\text{H}_{15}\text{N}_3\text{ONa}$   $[\text{M}+\text{Na}]^+$  240.1107; found 240.1102.

(18)

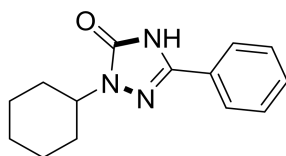

**2-Cyclohexyl-5-phenyl-2,4-dihydro-3H-1,2,4-triazol-3-one (3ar):** yellow solid (39.9 mg, 82% yield); mp: 237.6-238.6 °C;  $R_f = 0.3$  (petroleum ether: ethyl acetate = 3: 1);  $^1\text{H}$  NMR (500 MHz,  $\text{DMSO-}d_6$ )  $\delta$  12.18 (s, 1H), 7.79 (dd,  $J = 7.9, 1.8$  Hz, 2H), 7.57 – 7.29 (m, 3H), 3.95 (m,  $J = 11.7, 3.8$  Hz, 1H), 1.81 (m,  $J = 12.3, 4.3, 3.8$  Hz, 4H), 1.68 (m,  $J = 27.6, 14.0, 10.4$  Hz, 3H), 1.36 (m,  $J = 13.8, 3.7$  Hz, 2H), 1.20 m,  $J = 16.3, 13.0, 2.8$  Hz, 1H).  $^{13}\text{C}$  NMR (126 MHz,  $\text{DMSO-}d_6$ )  $\delta$  154.1, 143.7, 130.3, 129.4, 127.3, 125.2, 53.2, 31.7, 25.4, 25.4. HRMS (ESI)  $m/z$ : calcd for  $\text{C}_{14}\text{H}_{17}\text{N}_3\text{ONa}$   $[\text{M}+\text{Na}]^+$  266.1263; found 266.1266.

(19)

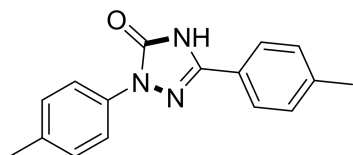

**2,5-Di-*p*-tolyl-2,4-dihydro-3H-1,2,4-triazol-3-one (3ba):** yellow solid (42.9 mg, 81% yield); mp: 160.4-161.4 °C;  $R_f = 0.3$  (petroleum ether: ethyl acetate = 3: 1);  $^1\text{H}$  NMR (500 MHz,  $\text{DMSO-}d_6$ )  $\delta$  12.56 (s, 1H), 7.89 – 7.83 (m, 2H), 7.83 – 7.78 (m, 2H), 7.34 (d,  $J = 8.0$  Hz, 2H), 7.29 – 7.25 (m, 2H), 2.37 (s, 3H), 2.32 (s, 3H).  $^{13}\text{C}$  NMR (126 MHz,  $\text{DMSO-}d_6$ )  $\delta$  153.3, 145.1, 140.9, 136.0, 134.4, 130.1, 129.8, 125.7, 123.9, 118.5, 21.5, 21.0. HRMS (ESI)  $m/z$ : calcd for  $\text{C}_{16}\text{H}_{15}\text{N}_3\text{ONa}$   $[\text{M}+\text{Na}]^+$  288.1107; found 288.1100.

(20)

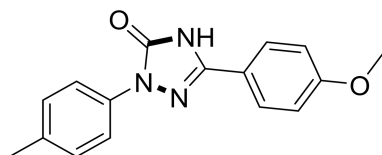

**5-(4-Methoxyphenyl)-2-(*p*-tolyl)-2,4-dihydro-3H-1,2,4-triazol-3-one (3bb):** yellow solid (42.7 mg, 76% yield); mp: 230.8-231.8 °C;  $R_f = 0.3$  (petroleum ether: ethyl acetate = 3: 1);  $^1\text{H}$  NMR (500 MHz,  $\text{DMSO-}d_6$ )  $\delta$  12.49 (s, 1H), 7.90 – 7.81 (m, 4H), 7.29 – 7.23 (m, 2H), 7.12 – 7.06 (m, 2H), 3.83 (s, 3H), 2.32 (s, 3H).  $^{13}\text{C}$  NMR (126 MHz,  $\text{DMSO-}d_6$ )  $\delta$  161.4, 153.4, 145.1, 136.1, 134.3, 129.8, 127.4, 119.2, 118.4,

114.9, 55.9, 21.0. HRMS (ESI)  $m/z$ : calcd for  $C_{16}H_{15}N_3O_2Na$   $[M+Na]^+$  304.1056; found 304.1046.

(21)

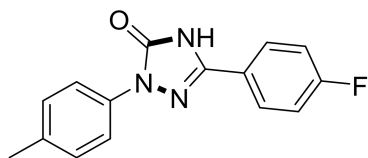

**5-(4-Fluorophenyl)-2-(*p*-tolyl)-2,4-dihydro-3H-1,2,4-triazol-3-one (3bc)**: yellow solid (42.0 mg, 78% yield); mp: 282.0-283.0 °C;  $R_f$  = 0.3 (petroleum ether: ethyl acetate = 3: 1);  $^1H$  NMR (500 MHz,  $DMSO-d_6$ )  $\delta$  12.66 (s, 1H), 7.99 – 7.94 (m, 2H), 7.89 – 7.83 (m, 2H), 7.41 (t,  $J$  = 8.8 Hz, 2H), 7.30 – 7.26 (m, 2H), 2.33 (s, 3H).  $^{13}C$  NMR (126 MHz,  $DMSO-d_6$ )  $\delta$  163.77 (d,  $J$  = 248.4 Hz), 153.25, 144.28, 135.88, 134.60, 129.88, 128.17 (d,  $J$  = 8.8 Hz), 123.31 (d,  $J$  = 3.1 Hz), 118.52, 116.71 (d,  $J$  = 22.3 Hz), 20.96.  $^{19}F$  NMR (471 MHz,  $DMSO-d_6$ )  $\delta$  -109.73. HRMS (ESI)  $m/z$ : calcd for  $C_{15}H_{12}FN_3ONa$   $[M+Na]^+$  292.0856; found 292.0850.

(22)

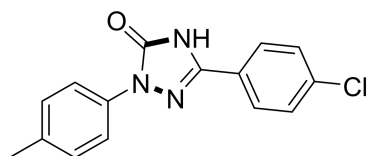

**5-(4-Chlorophenyl)-2-(*p*-tolyl)-2,4-dihydro-3H-1,2,4-triazol-3-one (3bd)**: yellow solid (45.6 mg, 80% yield); mp: 175.5-176.5 °C;  $R_f$  = 0.3 (petroleum ether: ethyl acetate = 3: 1);  $^1H$  NMR (500 MHz,  $DMSO-d_6$ )  $\delta$  12.70 (s, 1H), 7.94 – 7.90 (m, 2H), 7.88 – 7.84 (m, 2H), 7.65 – 7.61 (m, 2H), 7.30 – 7.26 (m, 2H), 2.33 (s, 3H).  $^{13}C$  NMR (126 MHz,  $DMSO-d_6$ )  $\delta$  153.2, 144.2, 135.8, 135.6, 134.7, 129.9, 129.7, 127.5, 125.6, 118.6, 21.0. HRMS (ESI)  $m/z$ : calcd for  $C_{15}H_{12}ClONa$   $[M+Na]^+$  308.0561; found 308.0554.

(23)

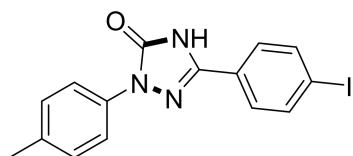

**5-(4-Iodophenyl)-2-(*p*-tolyl)-2,4-dihydro-3H-1,2,4-triazol-3-one (3be):** yellow solid (53.5 mg, 71% yield); mp: 287.3-288.3 °C;  $R_f = 0.3$  (petroleum ether: ethyl acetate = 3: 1);  $^1\text{H}$  NMR (500 MHz,  $\text{DMSO-}d_6$ )  $\delta$  7.93 (d,  $J = 8.4$  Hz, 1H), 7.85 (d,  $J = 8.6$  Hz, 1H), 7.69 (d,  $J = 8.5$  Hz, 1H), 7.28 (d,  $J = 8.3$  Hz, 1H), 2.33 (s, 1H).  $^{13}\text{C}$  NMR (126 MHz,  $\text{DMSO-}d_6$ )  $\delta$  153.2, 144.4, 138.4, 135.8, 134.7, 129.9, 127.5, 126.2, 118.6, 98.0, 21.0. HRMS (ESI)  $m/z$ : calcd for  $\text{C}_{15}\text{H}_{12}\text{IN}_3\text{ONa}$   $[\text{M}+\text{Na}]^+$  399.9917; found 399.9908.

(24)

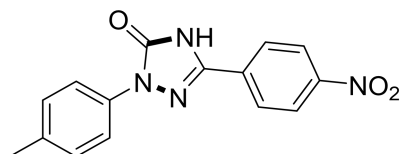

**5-(4-Nitrophenyl)-2-(*p*-tolyl)-2,4-dihydro-3H-1,2,4-triazol-3-one (3bf):** yellow solid (36.7 mg, 62% yield); mp: 324.0-325.0 °C;  $R_f = 0.3$  (petroleum ether: ethyl acetate = 2: 1);  $^1\text{H}$  NMR (500 MHz,  $\text{DMSO-}d_6$ )  $\delta$  12.94 (s, 1H), 8.38 (d,  $J = 9.0$  Hz, 2H), 8.16 (d,  $J = 8.9$  Hz, 2H), 7.88 (d,  $J = 8.5$  Hz, 2H), 7.29 (d,  $J = 8.6$  Hz, 2H), 2.33 (s, 3H).  $^{13}\text{C}$  NMR (126 MHz,  $\text{DMSO-}d_6$ )  $\delta$  153.8, 148.5, 144.0, 135.8, 134.9, 132.9, 129.9, 126.8, 124.8, 118.7, 21.0. HRMS (ESI)  $m/z$ : calcd for  $\text{C}_{15}\text{H}_{12}\text{N}_4\text{O}_3\text{Na}$   $[\text{M}+\text{Na}]^+$  319.0801.

(25)

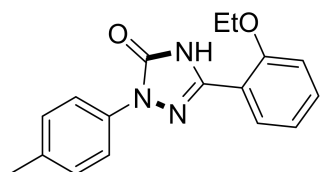

**5-(2-Ethoxyphenyl)-2-(*p*-tolyl)-2,4-dihydro-3H-1,2,4-triazol-3-one (3bg):** yellow solid (46.6 mg, 79% yield); mp: 191.8-192.8 °C;  $R_f = 0.3$  (petroleum ether: ethyl acetate = 3: 1);  $^1\text{H}$  NMR (500 MHz,  $\text{DMSO-}d_6$ )  $\delta$  7.92 – 7.83 (m, 2H), 7.75 (dd,  $J = 7.7, 1.8$  Hz, 1H), 7.48 (ddd,  $J = 8.8, 7.4, 1.8$  Hz, 1H), 7.26 (d,  $J = 8.2$  Hz, 2H), 7.16 (d,

$J = 8.4$  Hz, 1H), 7.06 (t,  $J = 7.5$  Hz, 1H), 4.16 (m,  $J = 6.9$  Hz, 2H), 2.31 (s, 3H), 1.38 (t,  $J = 6.9$  Hz, 3H).  $^{13}\text{C}$  NMR (126 MHz, DMSO- $d_6$ )  $\delta$  156.6, 153.1, 144.0, 136.0, 134.4, 132.5, 129.8, 129.5, 121.0, 118.5, 115.9, 113.2, 64.3, 20.9, 14.7. HRMS (ESI)  $m/z$ : calcd for  $\text{C}_{17}\text{H}_{17}\text{N}_3\text{O}_2\text{Na}$   $[\text{M}+\text{Na}]^+$  318.1212; found 318.1207.

(26)

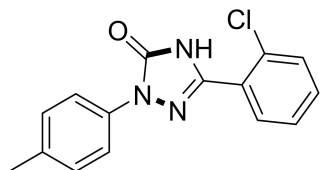

**5-(2-Chlorophenyl)-2-(*p*-tolyl)-2,4-dihydro-3H-1,2,4-triazol-3-one (3bh):** yellow solid (35.3 mg, 62% yield); mp: 206.2-207.2 °C;  $R_f = 0.3$  (petroleum ether: ethyl acetate = 3: 1);  $^1\text{H}$  NMR (500 MHz, DMSO- $d_6$ )  $\delta$  12.47 (s, 1H), 7.87 – 7.81 (m, 2H), 7.75 (dd,  $J = 7.6, 1.8$  Hz, 1H), 7.66 (dd,  $J = 7.9, 1.3$  Hz, 1H), 7.58 (m,  $J = 7.7, 1.8$  Hz, 1H), 7.52 (m,  $J = 7.5, 1.3$  Hz, 1H), 7.30 – 7.25 (m, 2H), 2.32 (s, 3H).  $^{13}\text{C}$  NMR (126 MHz, DMSO- $d_6$ )  $\delta$  152.9, 143.8, 135.8, 134.7, 132.5, 132.3, 131.6, 131.0, 129.9, 128.1, 126.3, 118.6, 21.0. HRMS (ESI)  $m/z$ : calcd for  $\text{C}_{15}\text{H}_{12}\text{ClN}_3\text{ONa}$   $[\text{M}+\text{Na}]^+$  308.0561; found 308.0554.

(27)

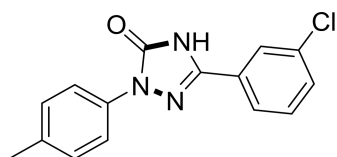

**5-(3-Chlorophenyl)-2-phenyl-2,4-dihydro-3H-1,2,4-triazol-3-one (3bi):** yellow solid (39.9 mg, 70% yield);  $R_f = 0.3$  (petroleum ether: ethyl acetate = 3: 1);  $^1\text{H}$  NMR (500 MHz, DMSO- $d_6$ )  $\delta$  12.80 (s, 1H), 8.10 (t,  $J = 2.1$  Hz, 1H), 7.98 (dd,  $J = 8.0, 2.0$  Hz, 1H), 7.97 – 7.91 (m, 2H), 7.56 (p,  $J = 3.5$  Hz, 3H), 7.52 (t,  $J = 8.1$  Hz, 1H), 7.31 (dd,  $J = 8.0, 2.1$  Hz, 1H).  $^{13}\text{C}$  NMR (126 MHz, DMSO- $d_6$ )  $\delta$  167.9, 153.4, 145.8, 139.5, 133.9, 131.4, 131.3, 129.6, 126.4, 125.9, 125.0, 117.7, 116.6. HRMS (ESI)  $m/z$ : calcd for  $\text{C}_{15}\text{H}_{12}\text{ClN}_3\text{ONa}$   $[\text{M}+\text{Na}]^+$  308.0561; found 308.0555.

(28)

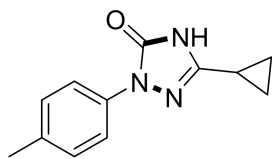

**5-Cyclopropyl-2-(p-tolyl)-2,4-dihydro-3H-1,2,4-triazol-3-one (3bj):** yellow solid (26.2 mg, 61% yield); mp: 214.2-215.2 °C;  $R_f$  = 0.3 (petroleum ether: ethyl acetate = 3: 1);  $^1\text{H}$  NMR (500 MHz, DMSO- $d_6$ )  $\delta$  11.73 (s, 1H), 7.77 – 7.70 (m, 2H), 7.24 – 7.18 (m, 2H), 2.29 (s, 3H), 1.85 (m,  $J$  = 8.4, 5.1 Hz, 1H), 1.01 – 0.94 (m, 2H), 0.93 – 0.86 (m, 2H).  $^{13}\text{C}$  NMR (126 MHz, DMSO- $d_6$ )  $\delta$  152.9, 149.5, 136.0, 133.9, 129.7, 118.1, 20.9, 7.8, 6.9. HRMS (ESI)  $m/z$ : calcd for  $\text{C}_{12}\text{H}_{14}\text{N}_3\text{O}$   $[\text{M}+\text{H}]^+$  216.1131; found 216.1130.

(29)

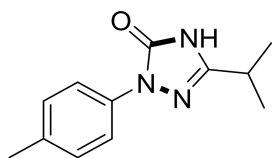

**5-Isopropyl-2-(p-tolyl)-2,4-dihydro-3H-1,2,4-triazol-3-one (3bk):** yellow solid (26.0 mg, 60% yield); mp: 167.7-168.7 °C;  $R_f$  = 0.3 (petroleum ether: ethyl acetate = 3: 1);  $^1\text{H}$  NMR (500 MHz, DMSO- $d_6$ )  $\delta$  11.86 (s, 1H), 7.78 – 7.73 (m, 2H), 7.22 (d,  $J$  = 8.3 Hz, 2H), 2.83 (m,  $J$  = 6.9 Hz, 1H), 2.30 (s, 3H), 1.23 (d,  $J$  = 6.9 Hz, 6H).  $^{13}\text{C}$  NMR (126 MHz, DMSO- $d_6$ )  $\delta$  153.2, 152.3, 136.1, 133.9, 129.8, 118.1, 26.9, 20.9, 20.1. HRMS (ESI)  $m/z$ : calcd for  $\text{C}_{11}\text{H}_{13}\text{N}_3\text{O}$   $[\text{M}+\text{H}]^+$  226.0950; found 226.0943.

(30)

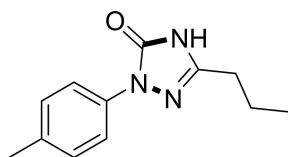

**5-Propyl-2-(p-tolyl)-2,4-dihydro-3H-1,2,4-triazol-3-one (3bl):** yellow solid (29.5 mg, 68% yield); mp: 149.0-150.0 °C;  $R_f$  = 0.3 (petroleum ether: ethyl acetate = 3: 1);  $^1\text{H}$  NMR (500 MHz, DMSO- $d_6$ )  $\delta$  11.81 (s, 1H), 7.78 – 7.72 (m, 2H), 7.24 – 7.20 (m, 2H), 2.47 (t,  $J$  = 7.5 Hz, 2H), 2.30 (s, 3H), 1.66 (m,  $J$  = 7.5 Hz, 2H), 0.94 (t,  $J$  = 7.4

Hz, 3H).  $^{13}\text{C}$  NMR (126 MHz,  $\text{DMSO-}d_6$ )  $\delta$  153.1, 147.9, 136.1, 133.9, 129.8, 118.1, 28.5, 20.9, 19.9, 13.8. HRMS (ESI)  $m/z$ : calcd for  $\text{C}_{12}\text{H}_{15}\text{N}_3\text{ONa}$   $[\text{M}+\text{Na}]^+$  240.1107; found 240.1099.

(31)

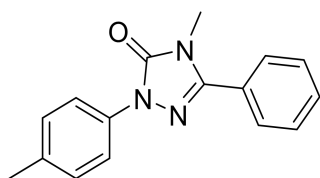

**4-Methyl-5-phenyl-2-(*p*-tolyl)-2,4-dihydro-3H-1,2,4-triazol-3-one (4a)** yellow oily (37.6 mg, 71% yield);  $R_f = 0.3$  (petroleum ether: ethyl acetate = 3: 1);  $^1\text{H}$  NMR (500 MHz, Chloroform-*d*)  $\delta$  7.98 – 7.91 (m, 2H), 7.73 – 7.66 (m, 2H), 7.57 – 7.50 (m, 3H), 7.25 (d,  $J = 8.1$  Hz, 2H), 3.45 (s, 3H), 2.38 (s, 3H).  $^{13}\text{C}$  NMR (126 MHz, Chloroform-*d*)  $\delta$  152.7, 146.4, 135.5, 135.1, 130.6, 129.5, 129.0, 128.1, 126.8, 118.8, 29.4, 21.0. HRMS (ESI)  $m/z$ : calcd for  $\text{C}_{16}\text{H}_{15}\text{N}_2\text{O}$   $[\text{M}+\text{Na}]^+$  288.1107; found 288.1100.

(32)

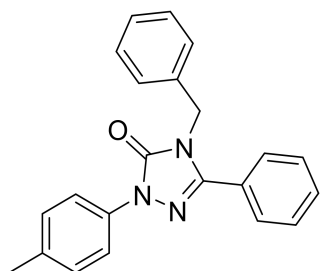

**4-Benzyl-5-phenyl-2-(*p*-tolyl)-2,4-dihydro-3H-1,2,4-triazol-3-one (4b)**: yellow oily (56.6 mg, 83% yield);  $R_f = 0.3$  (petroleum ether: ethyl acetate = 3: 1);  $^1\text{H}$  NMR (500 MHz, Chloroform-*d*)  $\delta$  8.06 – 7.97 (m, 2H), 7.57 – 7.54 (m, 2H), 7.53 – 7.50 (m, 1H), 7.46 (dd,  $J = 8.2, 6.7$  Hz, 2H), 7.36 – 7.27 (m, 5H), 7.25 – 7.20 (m, 2H), 5.04 (s, 2H), 2.40 (s, 3H).  $^{13}\text{C}$  NMR (126 MHz, Chloroform-*d*)  $\delta$  152.7, 146.7, 136.1, 135.5, 135.2, 130.7, 129.5, 129.0, 128.9, 128.4, 127.9, 127.1, 126.7, 118.8, 45.8, 21.0. HRMS (ESI)  $m/z$ : calcd for  $\text{C}_{16}\text{H}_{15}\text{N}_3\text{O}$   $[\text{M}+\text{Na}]^+$  364.1420; found 364.1413.

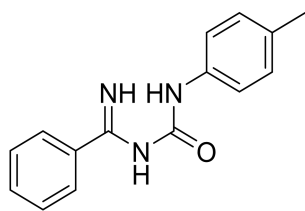

***N*-(*p*-tolylcarbonyl)benzimidamide (5a):**  $^1\text{H}$  NMR (500 MHz, Chloroform-*d*)  $\delta$  9.92 (s, 1H), 7.95 – 7.82 (m, 2H), 7.80 (d,  $J$  = 8.4 Hz, 1H), 7.57 – 7.51 (m, 1H), 7.47 (td,  $J$  = 7.7, 7.2, 1.8 Hz, 2H), 7.44 – 7.35 (m, 2H), 7.12 (d,  $J$  = 8.0 Hz, 2H), 6.27 (s, 1H), 2.33 (s, 3H).  $^{13}\text{C}$  NMR (126 MHz, Chloroform-*d*)  $\delta$  165.7, 163.5, 136.3, 135.5, 132.7, 131.8, 129.4, 128.8, 127.0, 119.2, 20.8. HRMS (ESI)  $m/z$ : calcd for  $\text{C}_{15}\text{H}_{15}\text{N}_3\text{ONa}$   $[\text{M}+\text{Na}]^+$  276.1107; found 276.1101.

#### 4. Gram-scale reaction and further transformations of 3aa

(a)

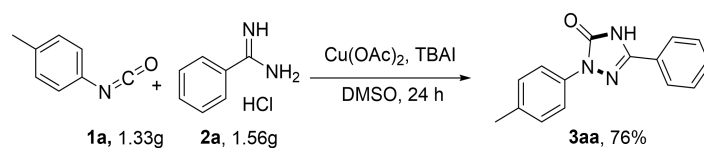

1-isocyanato-4-methylbenzene **1a** (10 mmol), benzimidine hydrochloride **2a** (10 mmol),  $\text{Cu}(\text{OAc})_2$  (20 mmol), TBAI (10 mmol) and DMSO (50 mL) were introduced in a 100mL roundbottomed, successively. Then the roundbottomed was closed and the resulting mixture was stirred at 80 °C by heating the mantle for 24 h. The combined filtrate was concentrated and purified by a flash column chromatography (EtOAc/petroleumether) on silica gel to afford the products **3aa**.

(b)

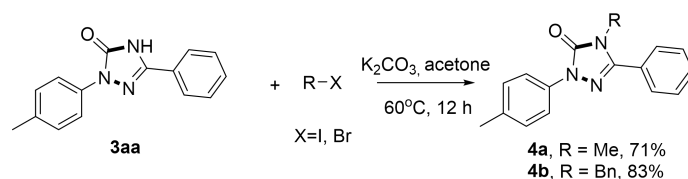

Stir a mixture of 1 equiv. of **3aa** (0.2 mmol), halide (0.6 mmol) and  $\text{K}_2\text{CO}_3$  (0.4 mmol) in acetone (2 mL) at 60°C for 12 hours in a Schlenk tube. Cool the mixture. Evaporate



the solvent under vacuum. Add 5 ml of water to the reaction mixture. Extract the reaction mixture with ethyl acetate (2 mL x 2). Dry the combined organic fractions over anhydrous sodium sulfate. Concentrate the organic fractions under vacuum. Purify the crude product by column chromatography using a mixture of dichloromethane/ethano(98:2) as eluent to obtain **4**.

## 5. NMR spectra of the obtained compounds

$^1\text{H}$  and  $^{13}\text{C}$  NMR spectra of 5-Phenyl-2-(p-tolyl)-2,4-dihydro-3H-1,2,4-triazol-3-one (3aa) (500 MHz,  $\text{DMSO-}d_6$ )

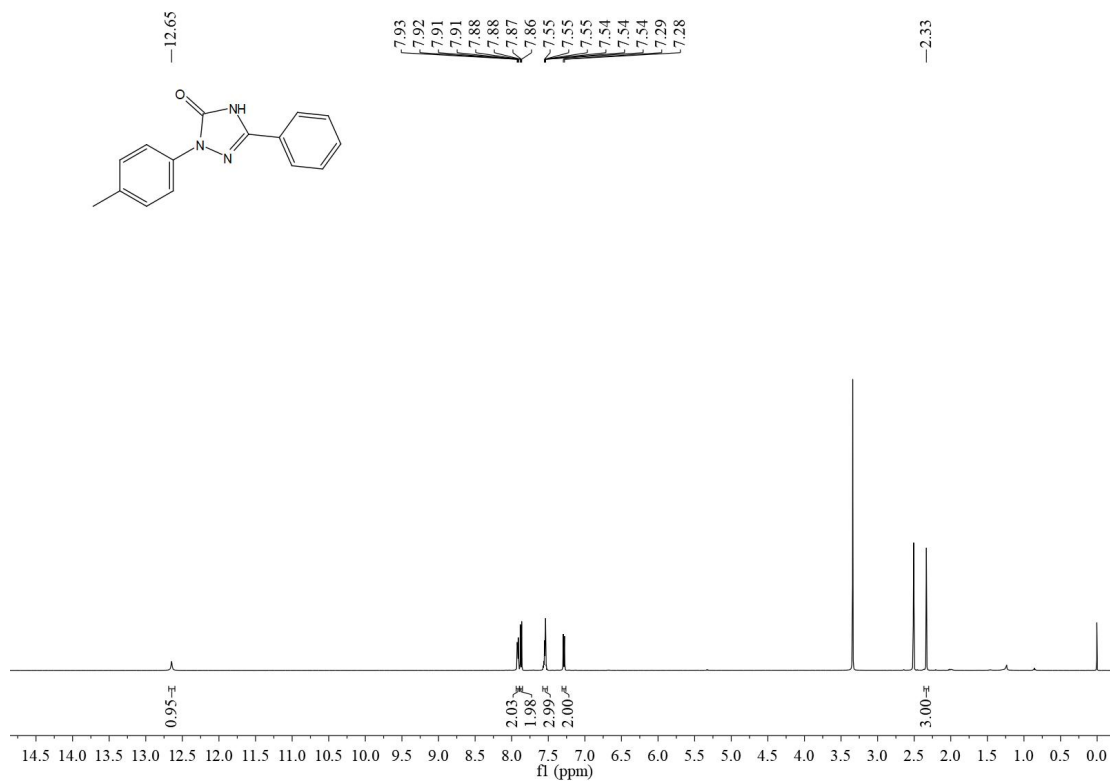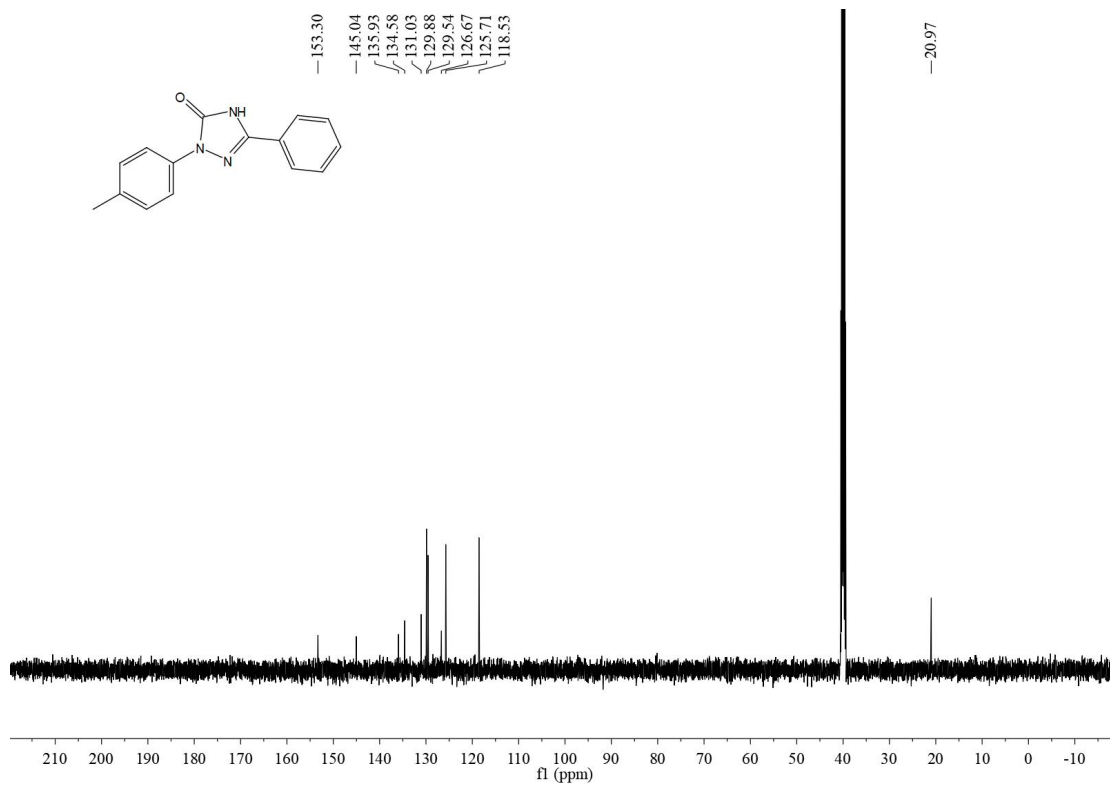

**<sup>1</sup>H and <sup>13</sup>C NMR spectra of 2,5-Diphenyl-2,4-dihydro-3H-1,2,4-triazol-3-one (3ab)**  
**(500 MHz, DMSO-*d*<sub>6</sub>)**

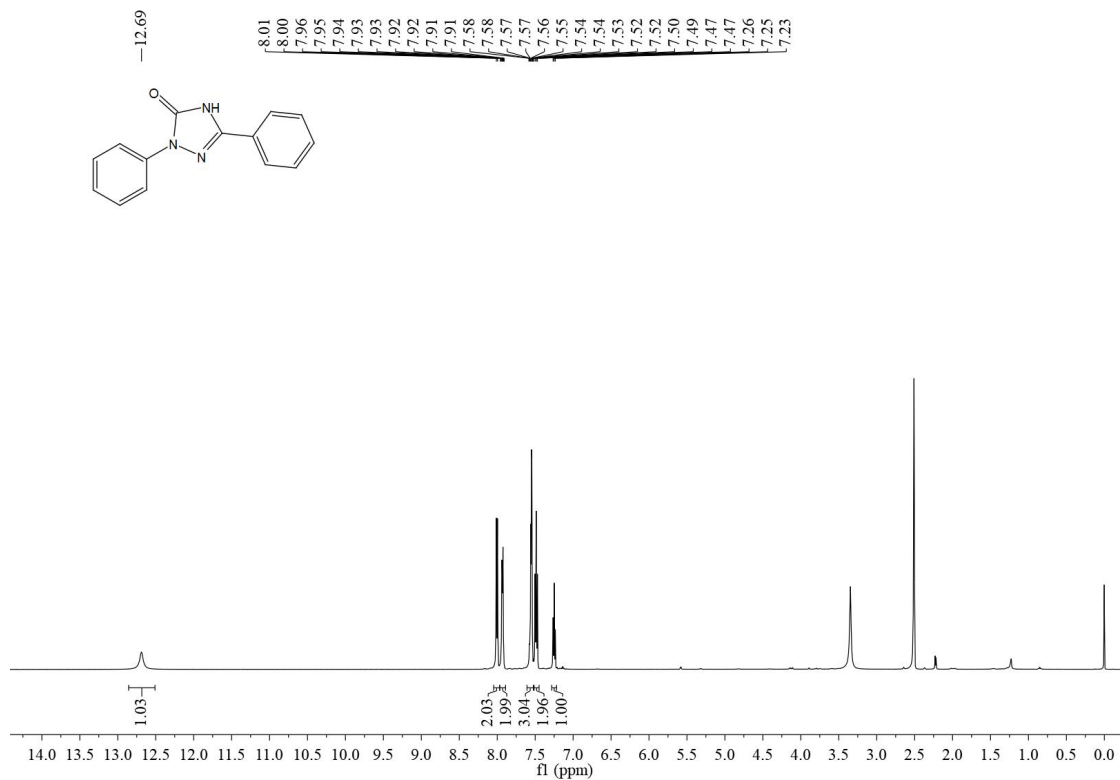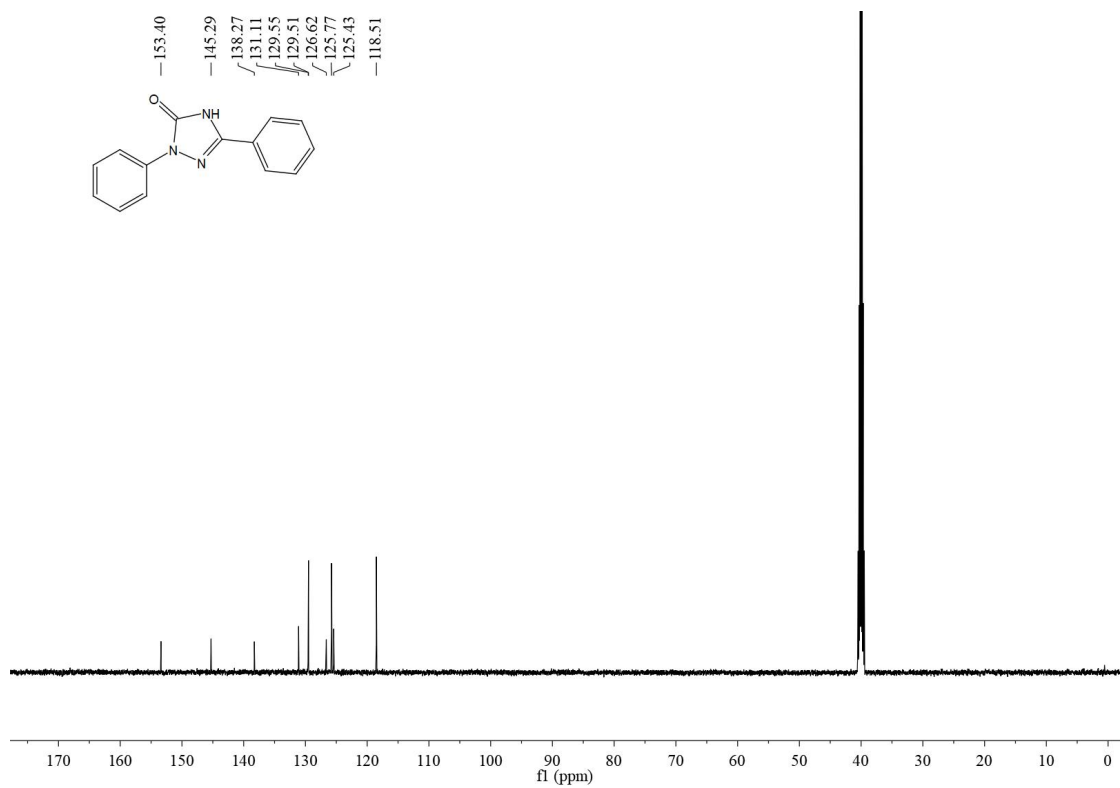

**$^1\text{H}$  and  $^{13}\text{C}$  NMR spectra of  
2-(4-Ethylphenyl)-5-phenyl-2,4-dihydro-3H-1,2,4-triazol-3-one (3ac) (500 MHz,  
DMSO- $d_6$ )**

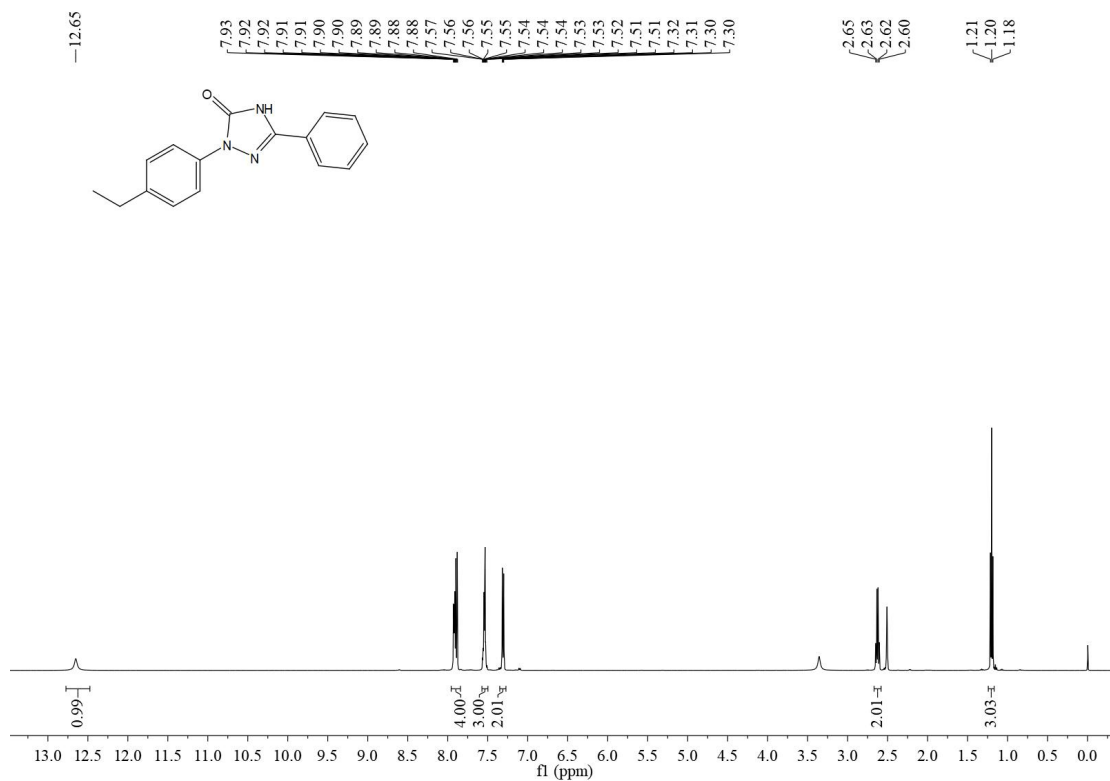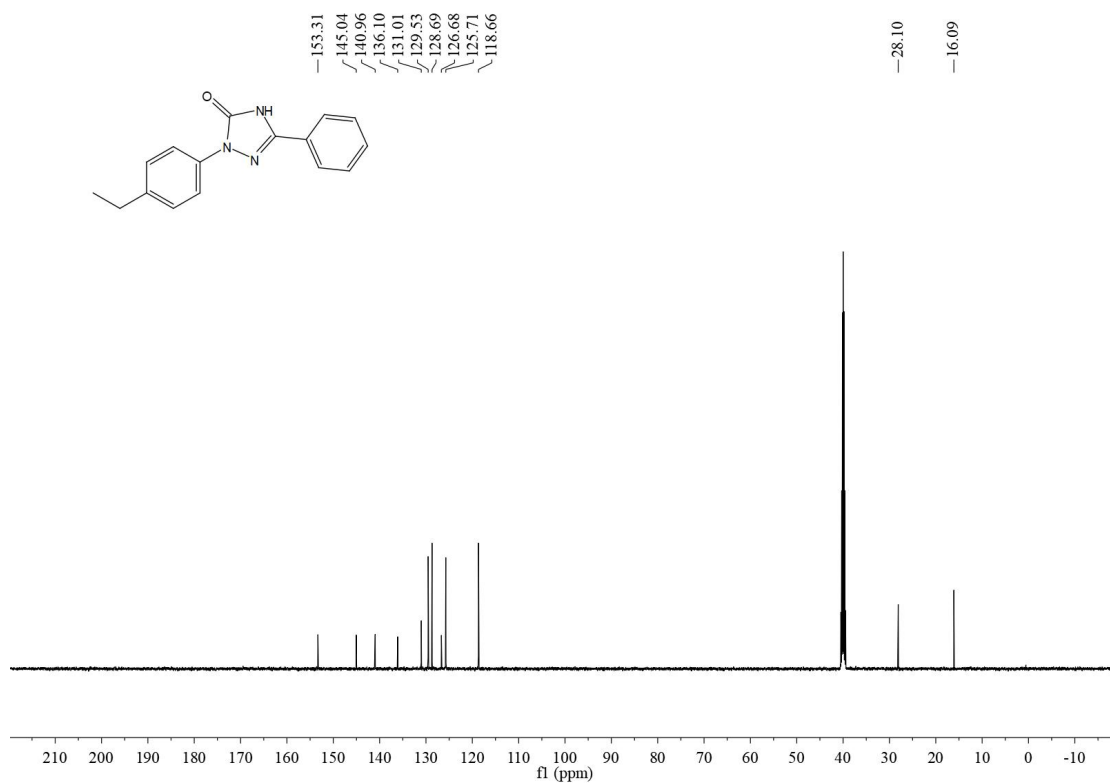

**$^1\text{H}$  and  $^{13}\text{C}$  NMR spectra of  
2-(4-Butylphenyl)-5-phenyl-2,4-dihydro-3H-1,2,4-triazol-3-one (3ad) (500 MHz,  
DMSO- $d_6$ )**

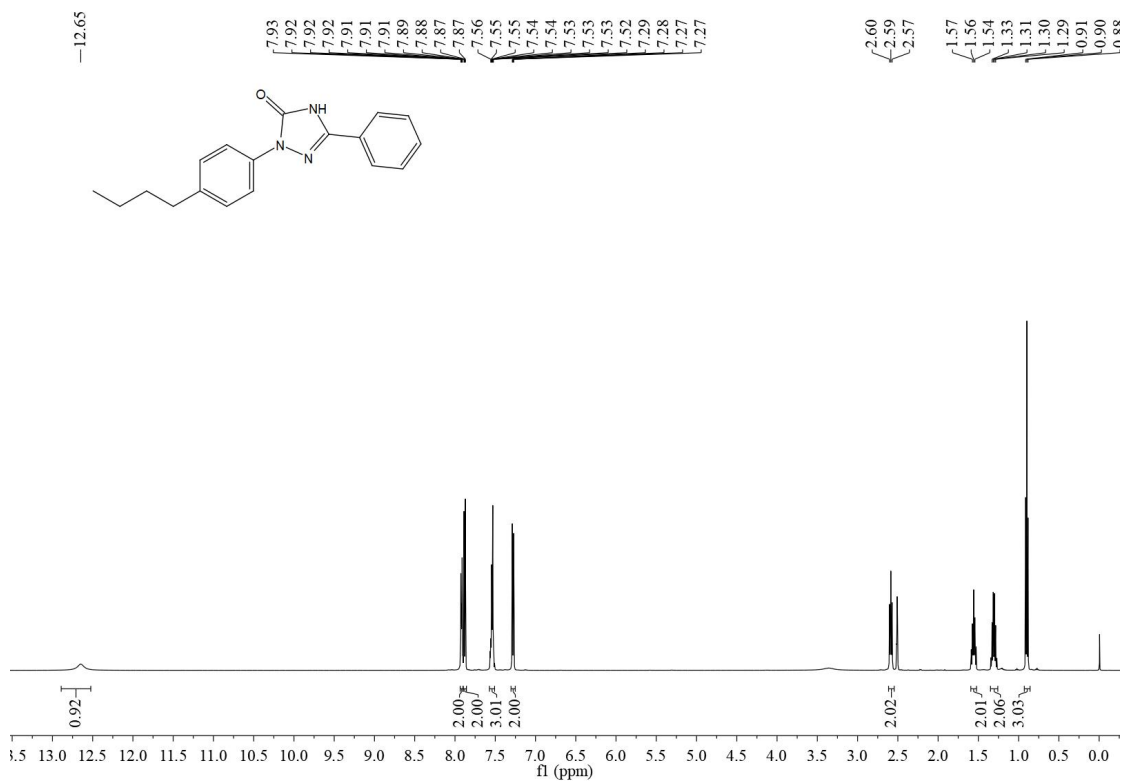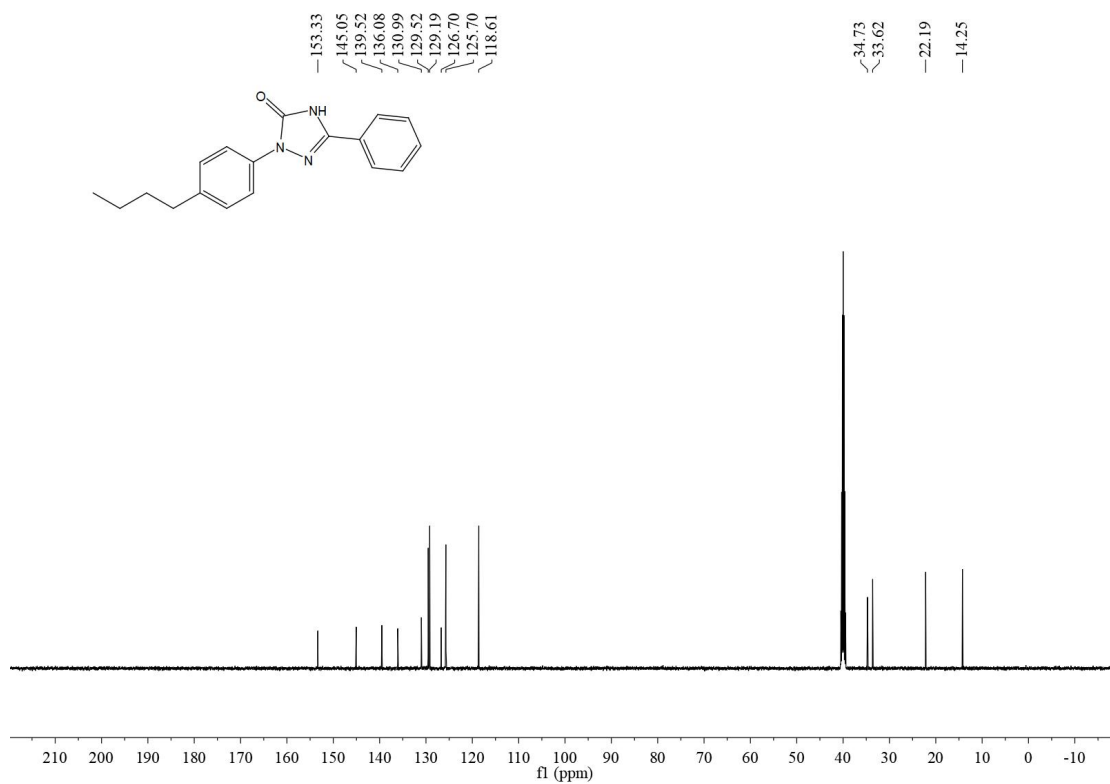

**<sup>1</sup>H and <sup>13</sup>C NMR spectra of 2-(4-(Tert-butyl)phenyl)-5-phenyl-2,4-dihydro-3H-1,2,4-triazol-3-one (3ae) (500 MHz, DMSO-d<sub>6</sub>)**

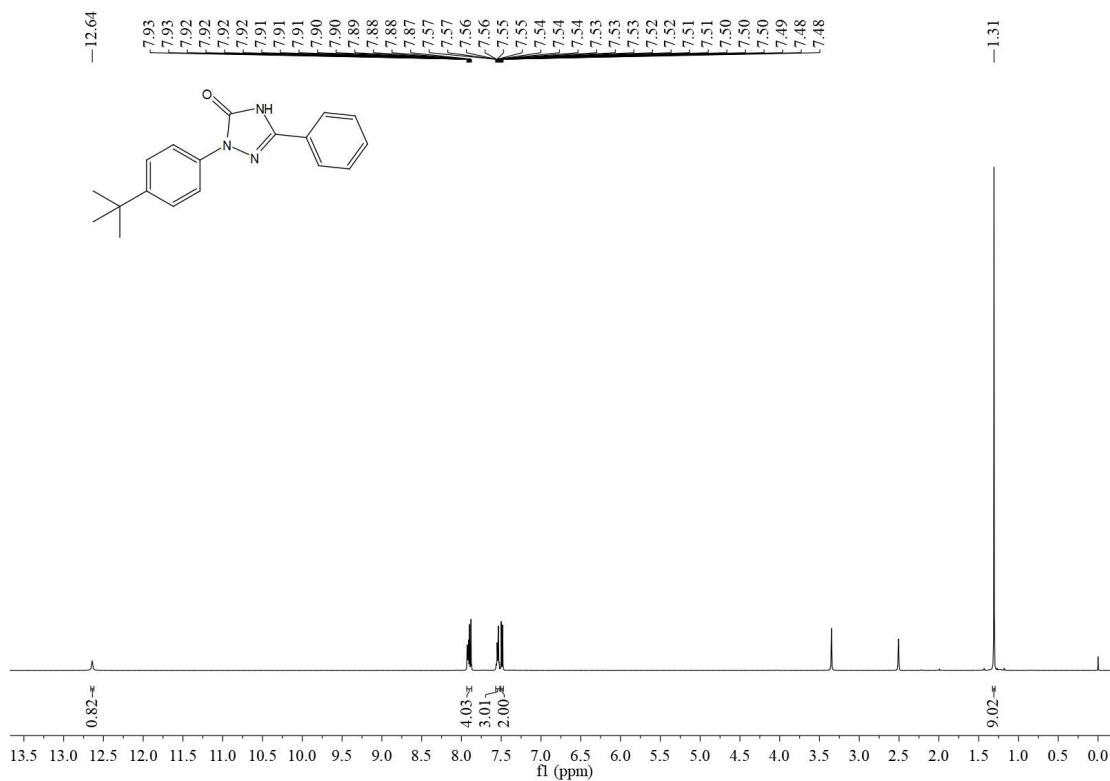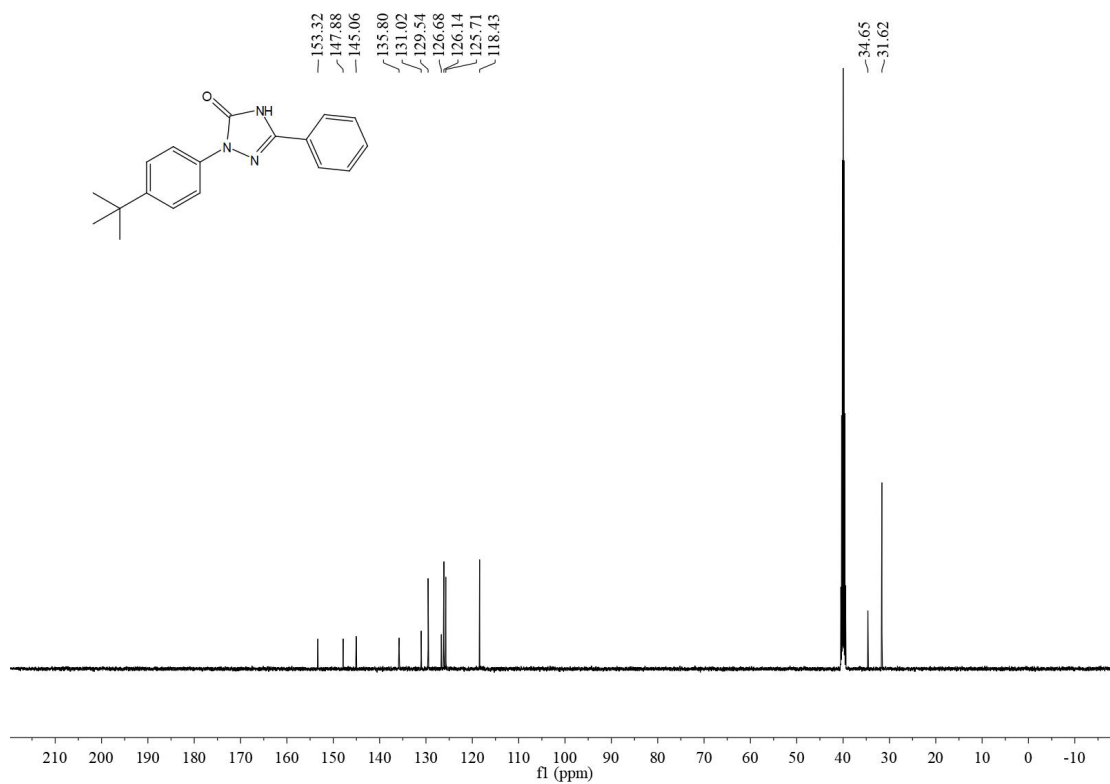

**$^1\text{H}$  and  $^{13}\text{C}$  NMR spectra of  
2-(4-Chlorophenyl)-5-phenyl-2,4-dihydro-3H-1,2,4-triazol-3-one (3af) (500 MHz,  
DMSO- $d_6$ )**

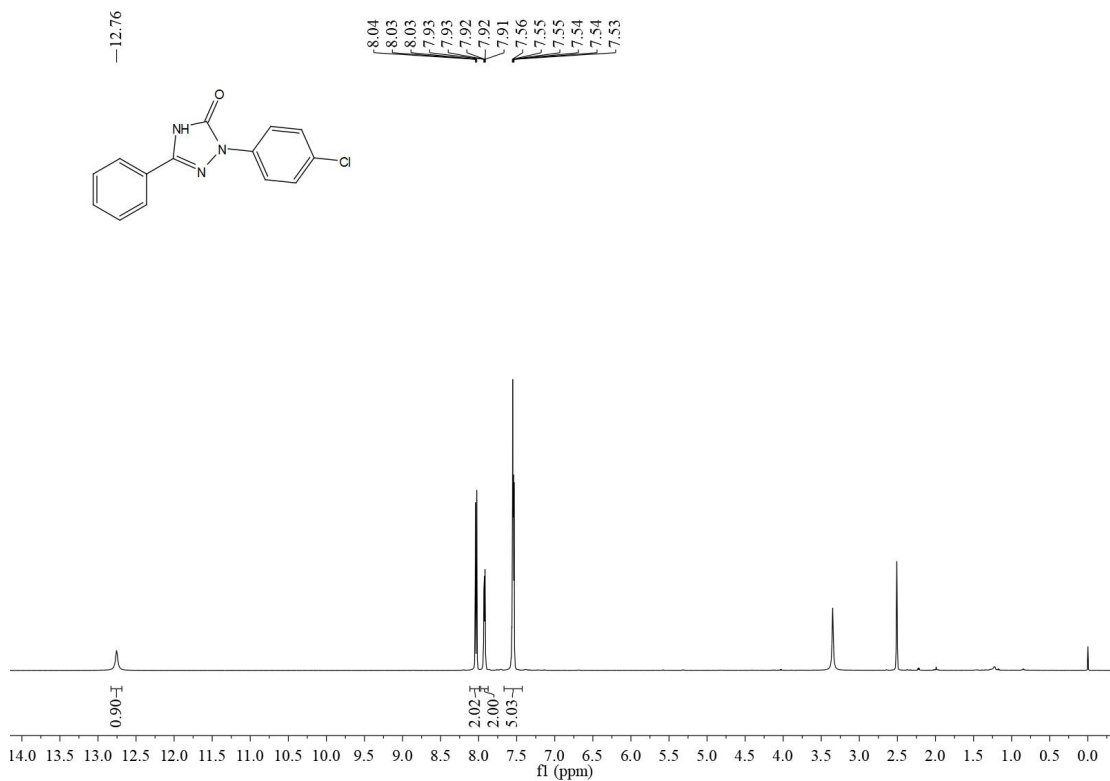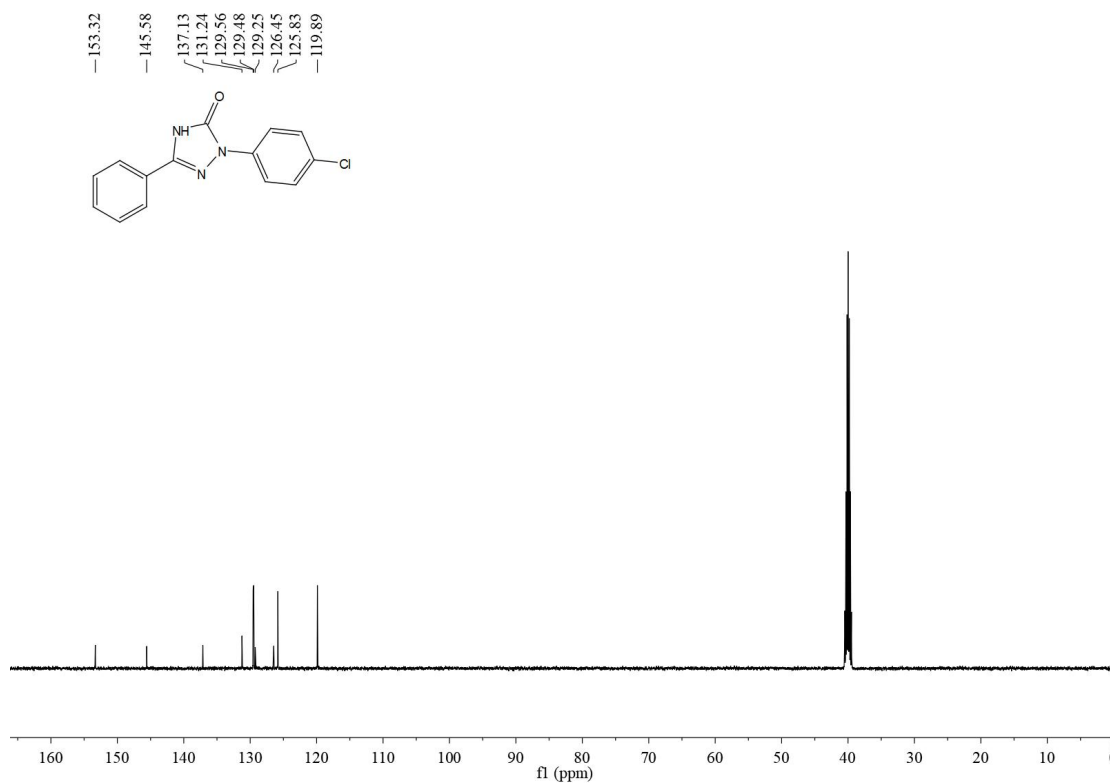

**$^1\text{H}$  and  $^{13}\text{C}$  NMR spectra of  
5-Phenyl-2-(4-(trifluoromethoxy)phenyl)-2,4-dihydro-3H-1,2,4-triazol-3-one (3ag)  
(500 MHz,  $\text{DMSO-}d_6$ )**

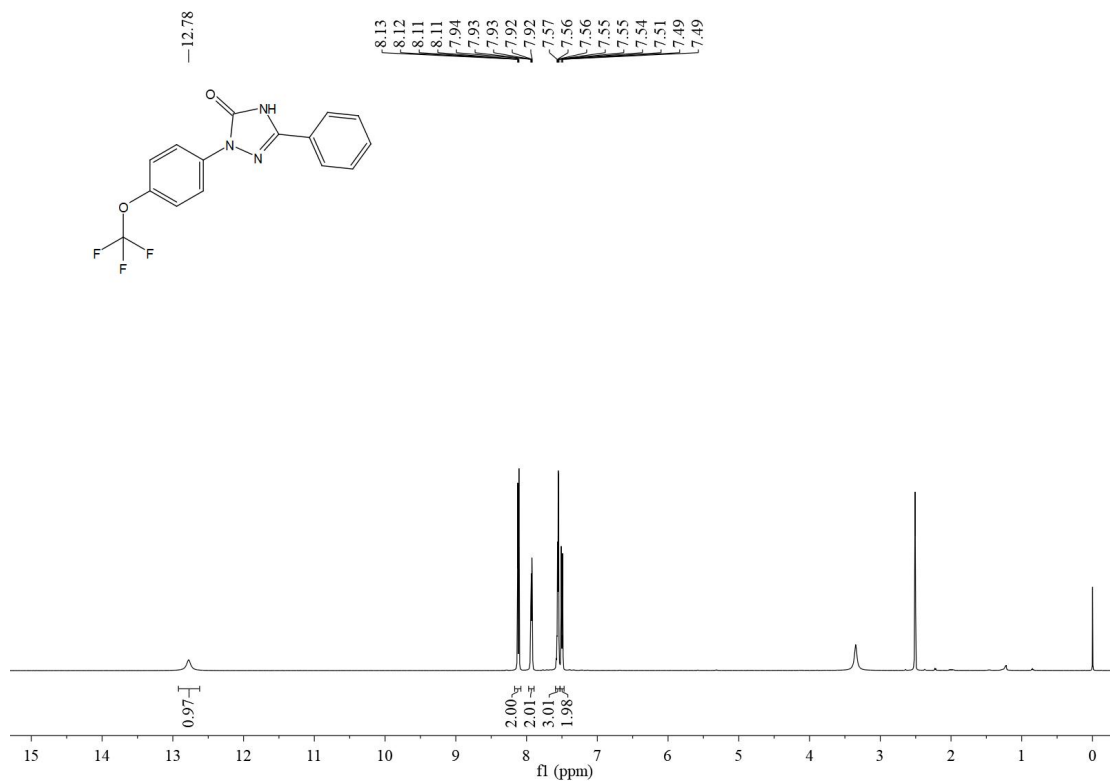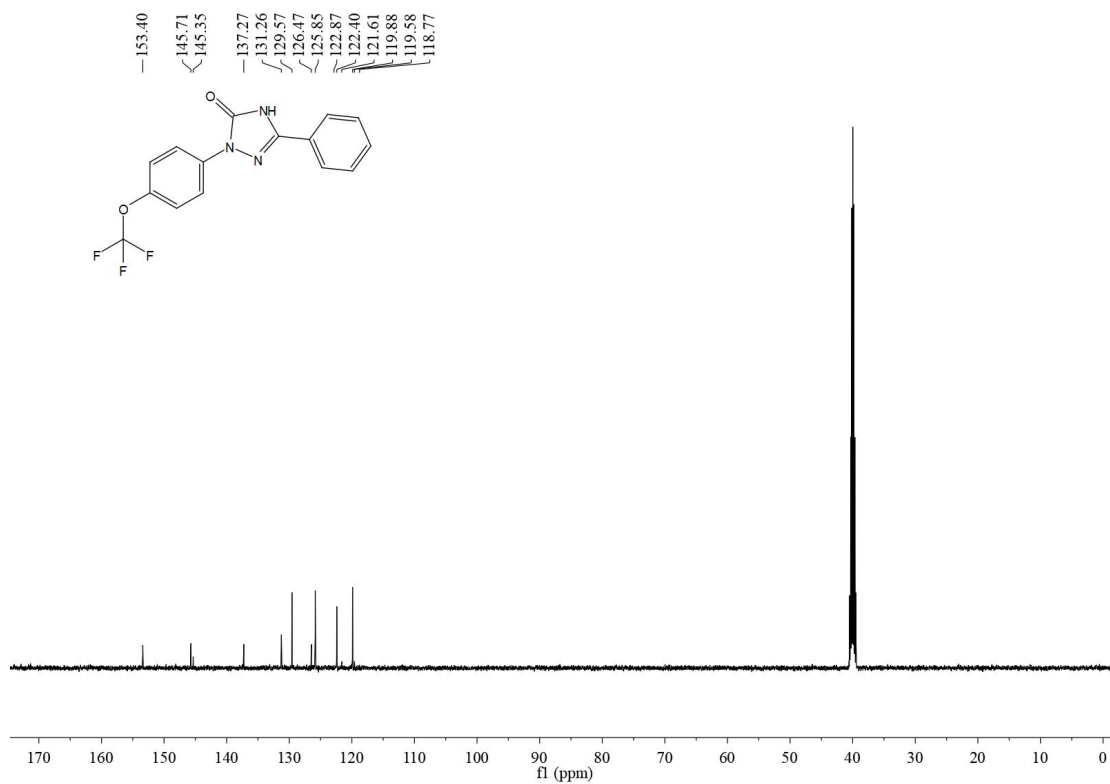



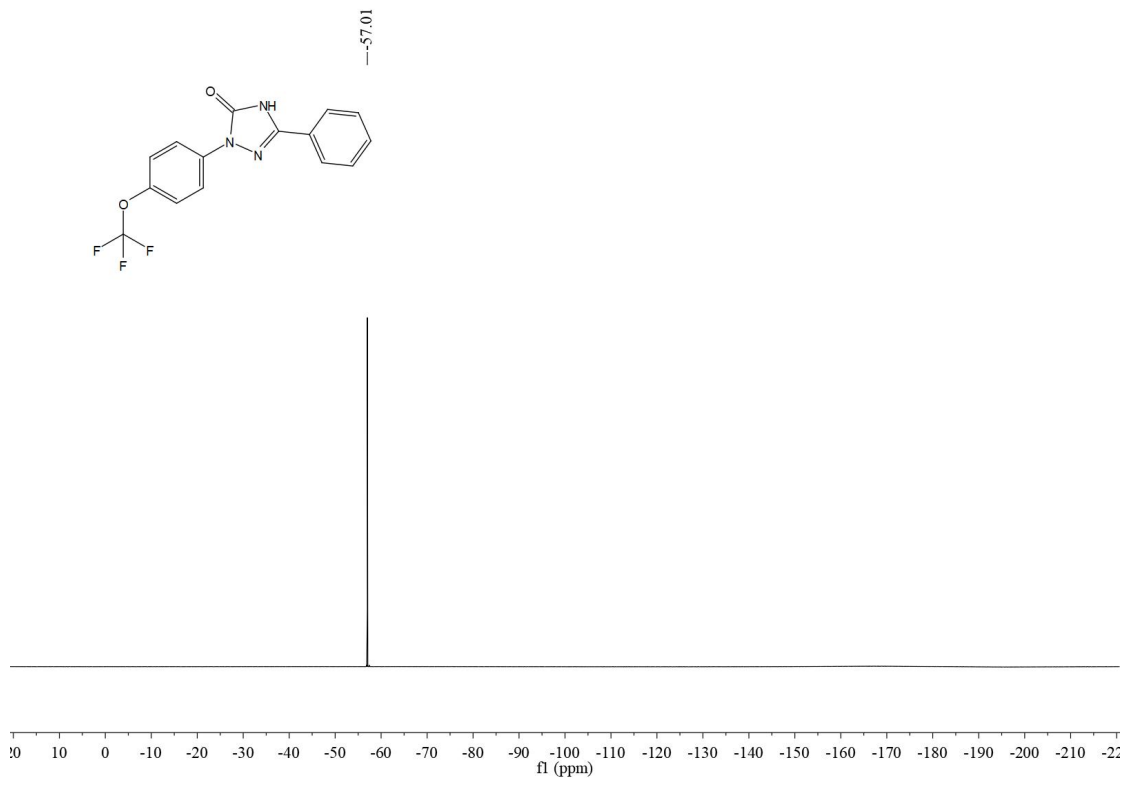

**<sup>1</sup>H and <sup>13</sup>C NMR spectra of  
5-Phenyl-2-(o-tolyl)-2,4-dihydro-3H-1,2,4-triazol-3-one (3ah) (500 MHz,  
DMSO-*d*<sub>6</sub>)**

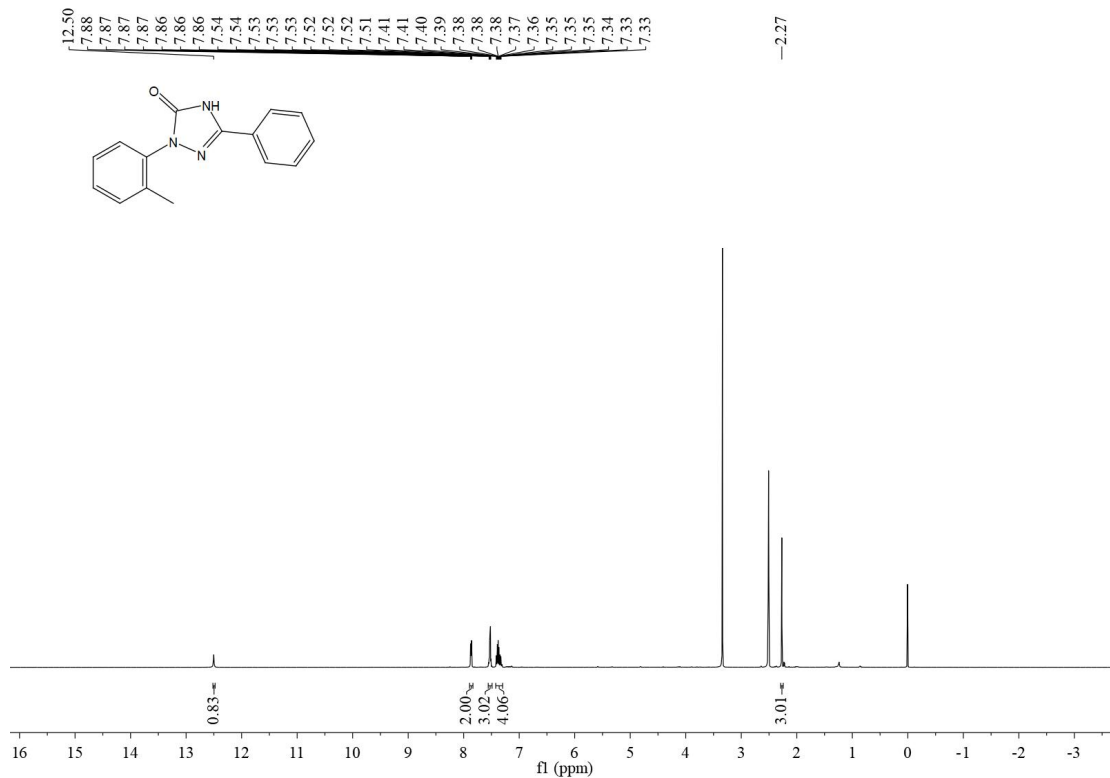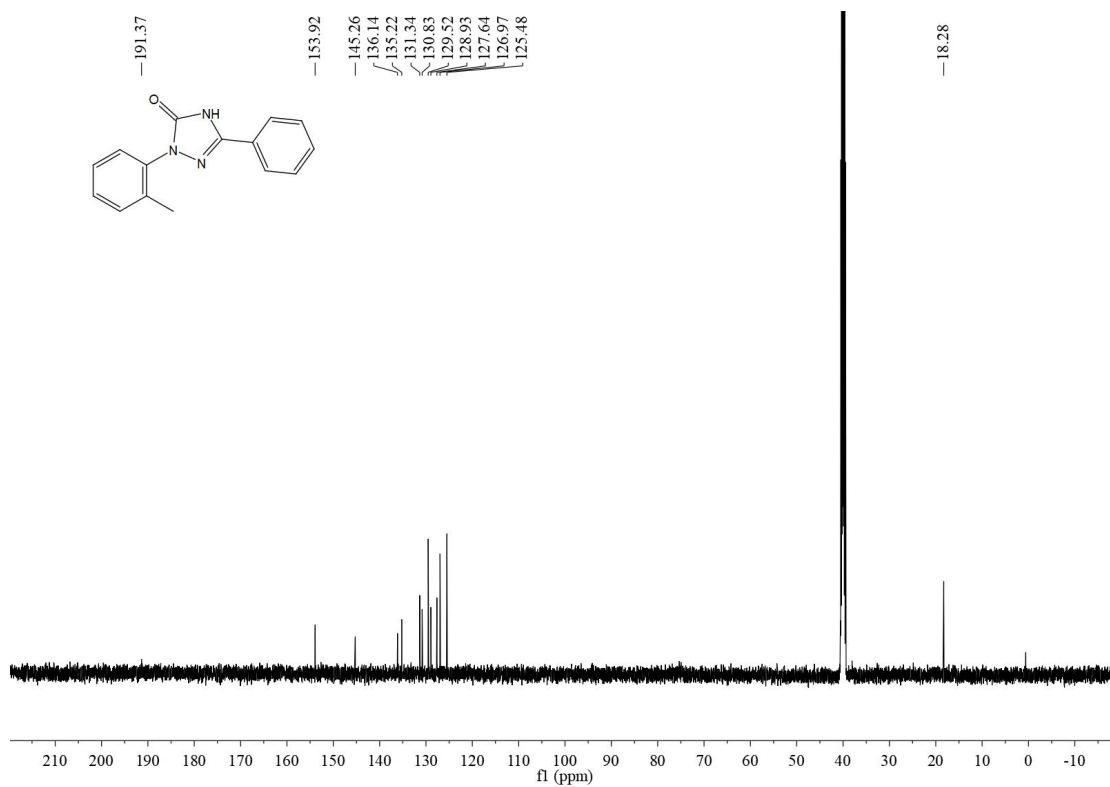

**<sup>1</sup>H and <sup>13</sup>C NMR spectra of  
2-(2-Fluorophenyl)-5-phenyl-2,4-dihydro-3H-1,2,4-triazol-3-one (3ai) (500 MHz,  
DMSO-*d*<sub>6</sub>)**

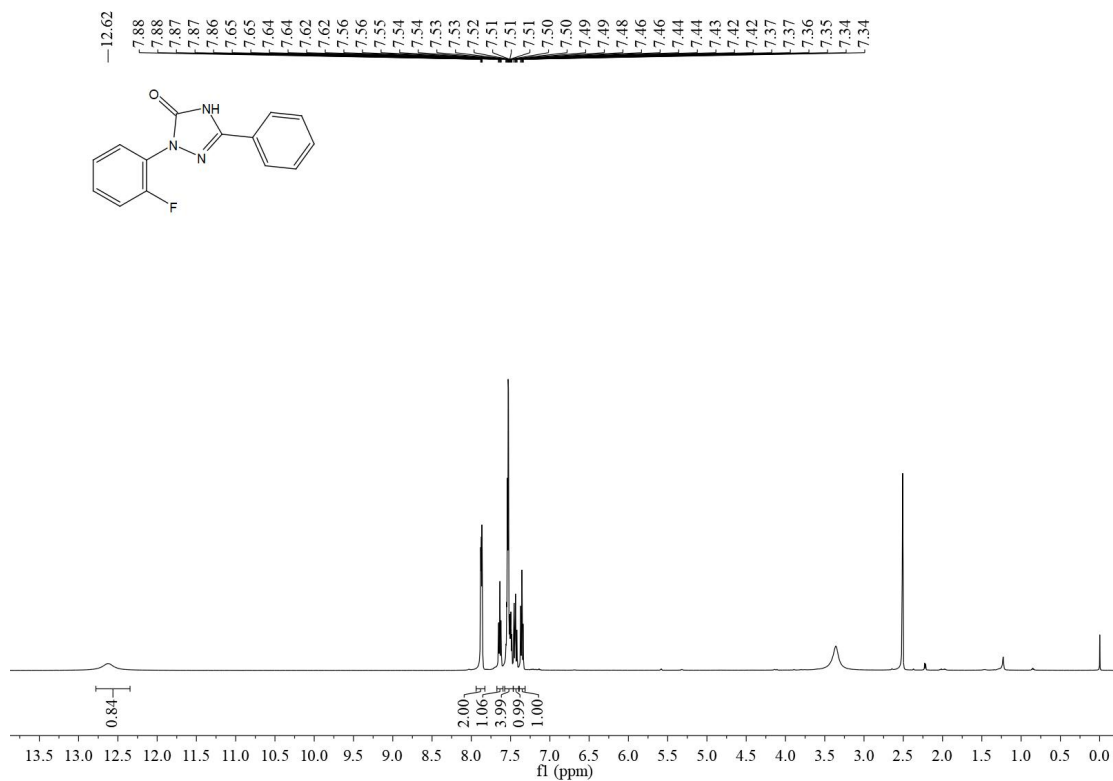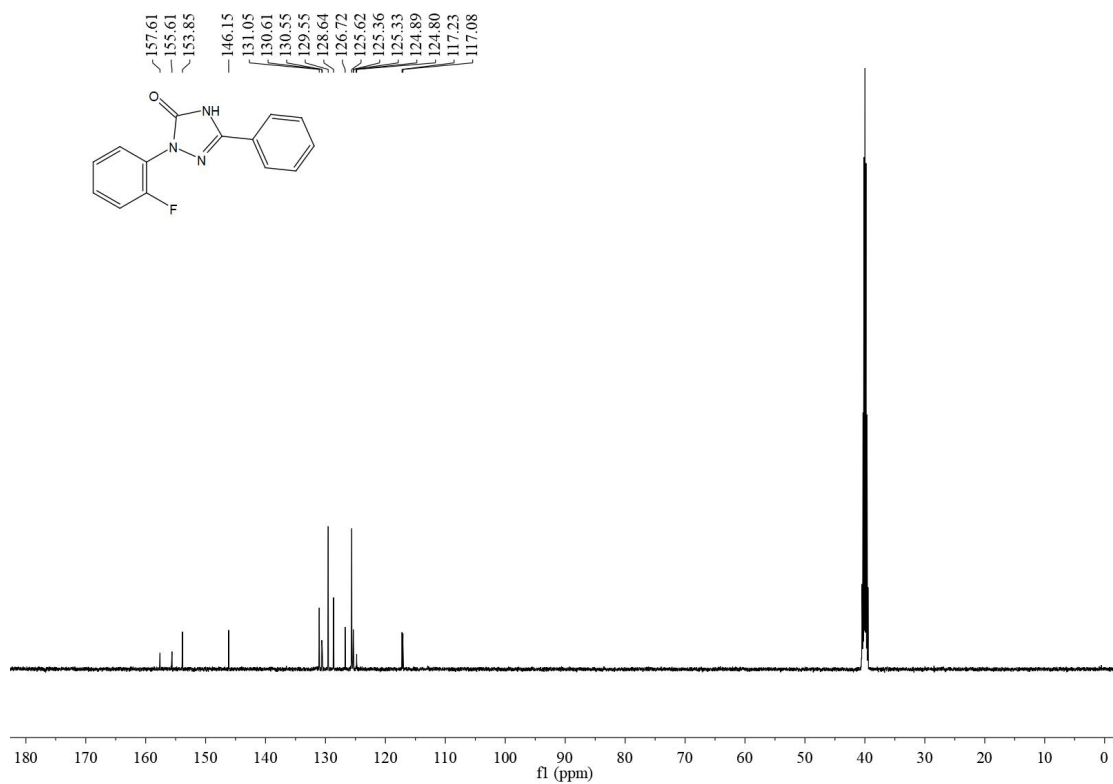

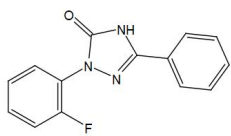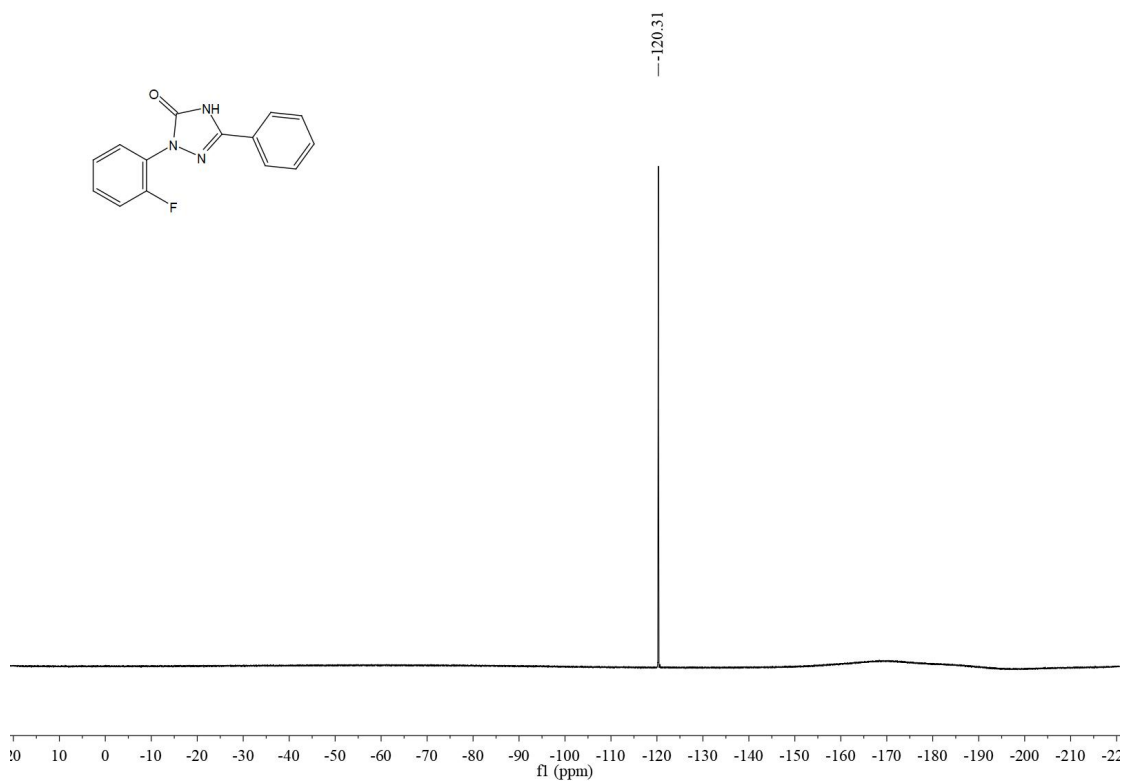

**<sup>1</sup>H and <sup>13</sup>C NMR spectra of  
5-Phenyl-2-(2-(trifluoromethyl)phenyl)-2,4-dihydro-3H-1,2,4-triazol-3-one (3aj)  
(500 MHz, DMSO-*d*<sub>6</sub>)**

7.94  
7.94  
7.92  
7.92  
7.87  
7.86  
7.86  
7.85  
7.85  
7.85  
7.83  
7.83  
7.73  
7.72  
7.70  
7.53  
7.53  
7.52  
7.52  
7.51  
7.51  
7.51  
7.50

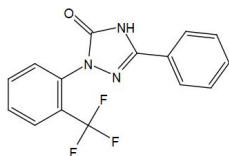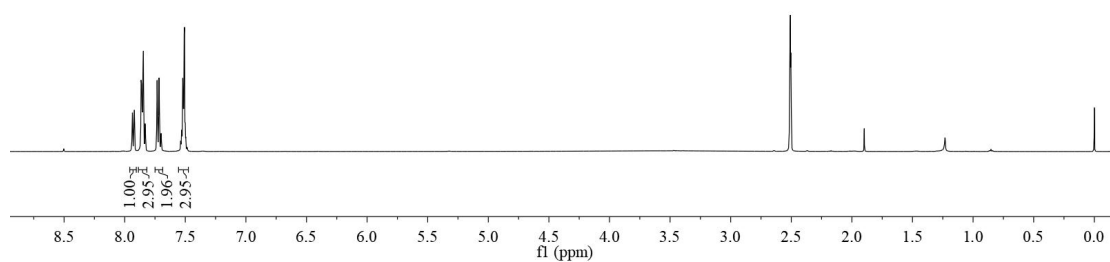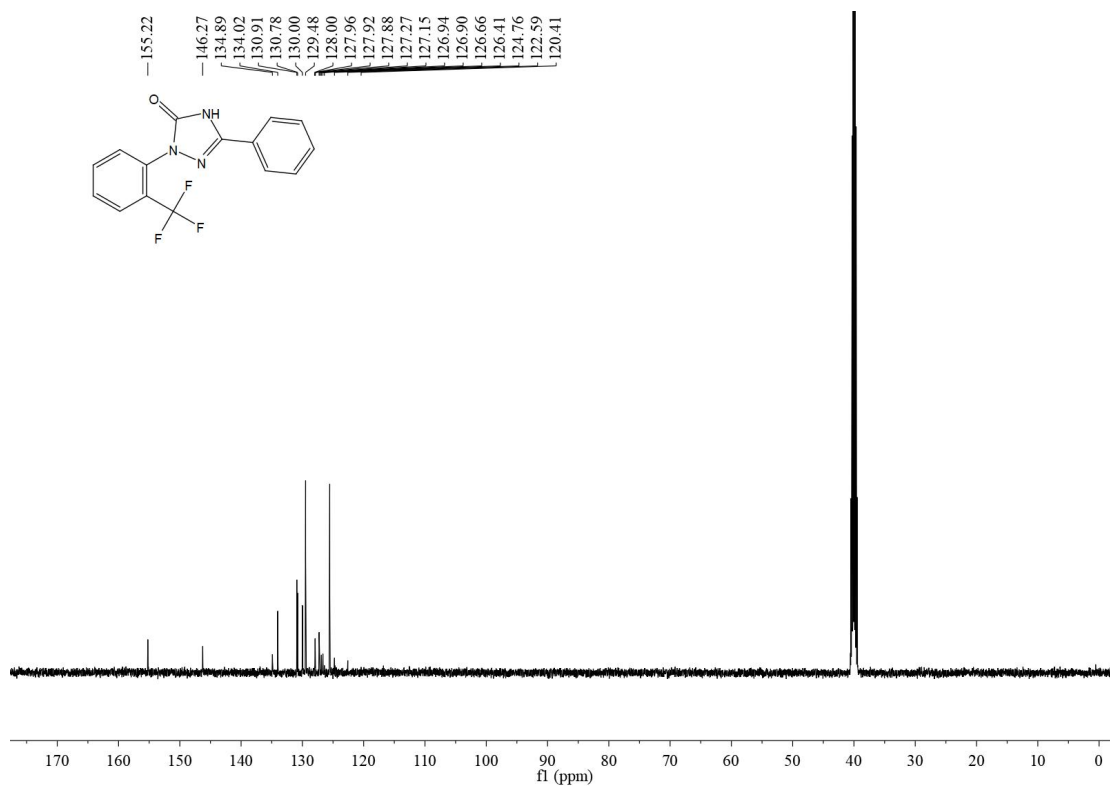

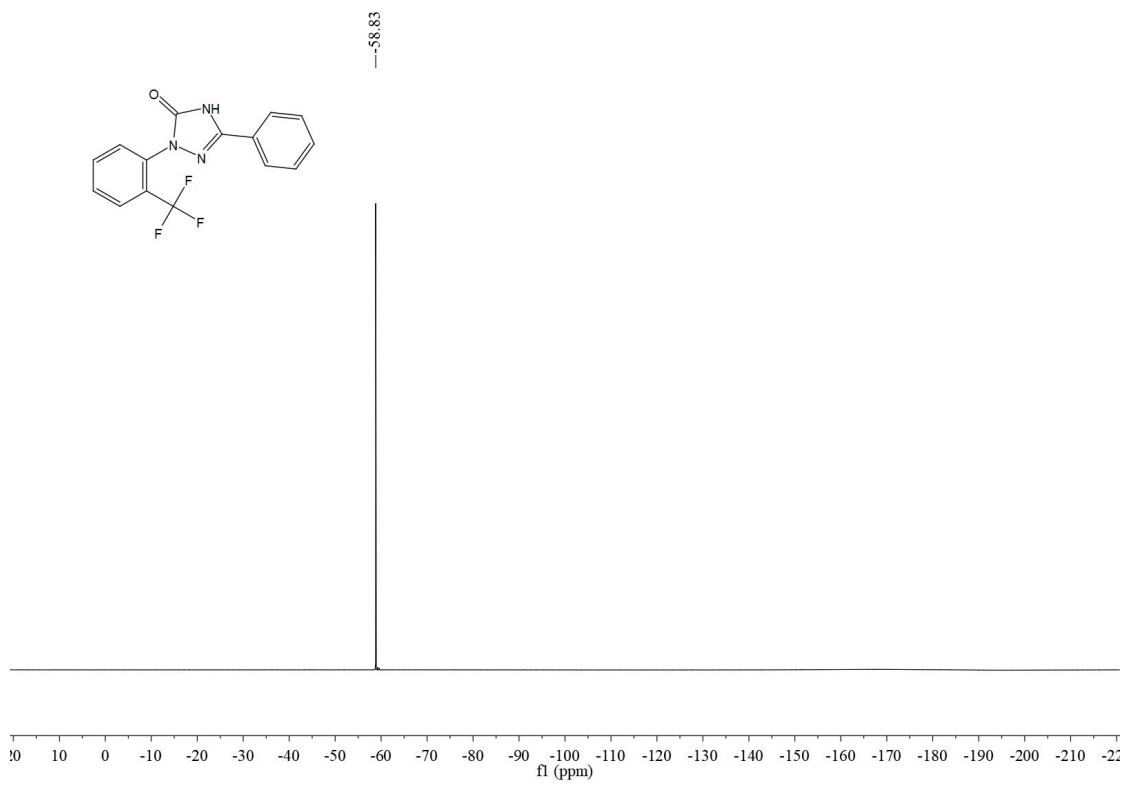

**<sup>1</sup>H and <sup>13</sup>C NMR spectra of  
2-(2,4-Dimethylphenyl)-5-phenyl-2,4-dihydro-3H-1,2,4-triazol-3-one (3ak) (500  
MHz, DMSO-*d*<sub>6</sub>)**

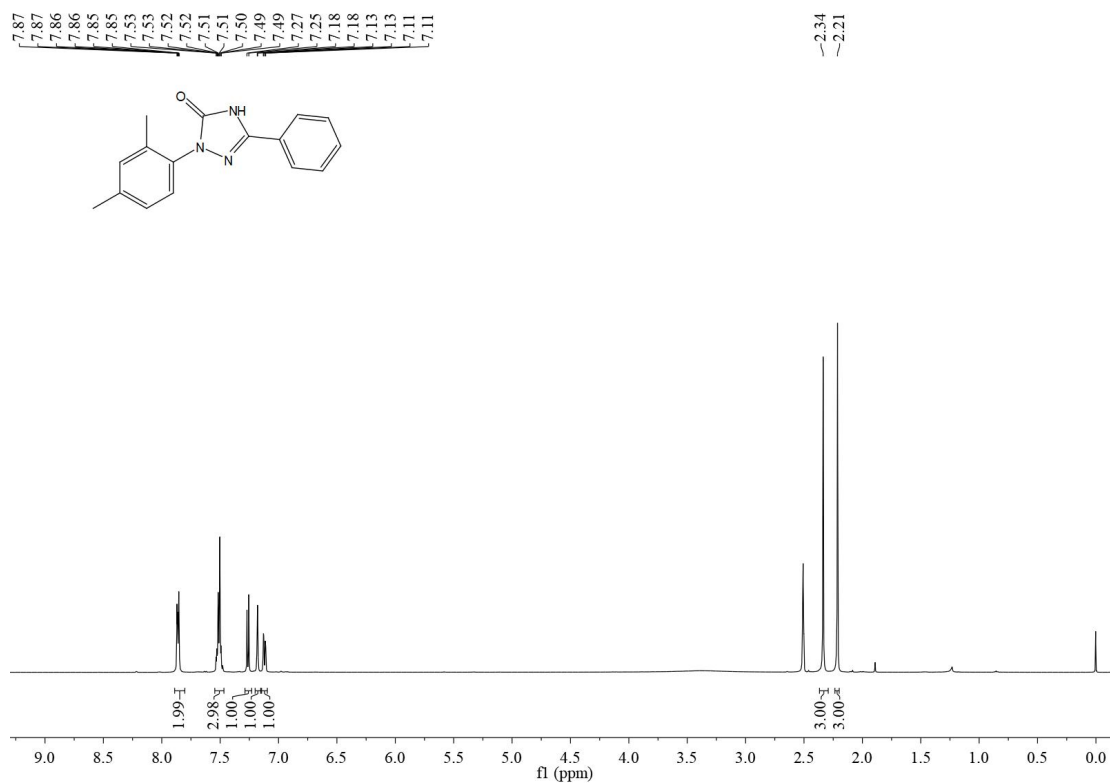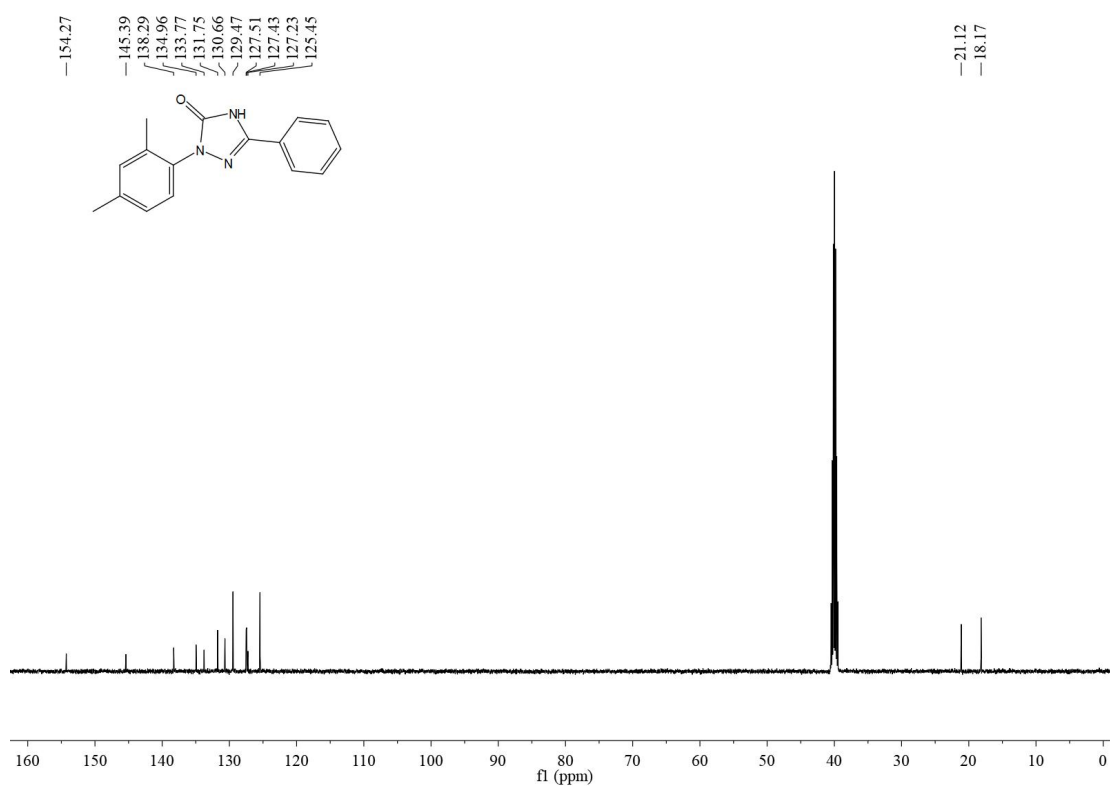

**$^1\text{H}$  and  $^{13}\text{C}$  NMR spectra of 2-(3,5-Dimethylphenyl)-5-phenyl-2,4-dihydro-3H-1,2,4-triazol-3-one (3a) (500 MHz, DMSO- $d_6$ )**

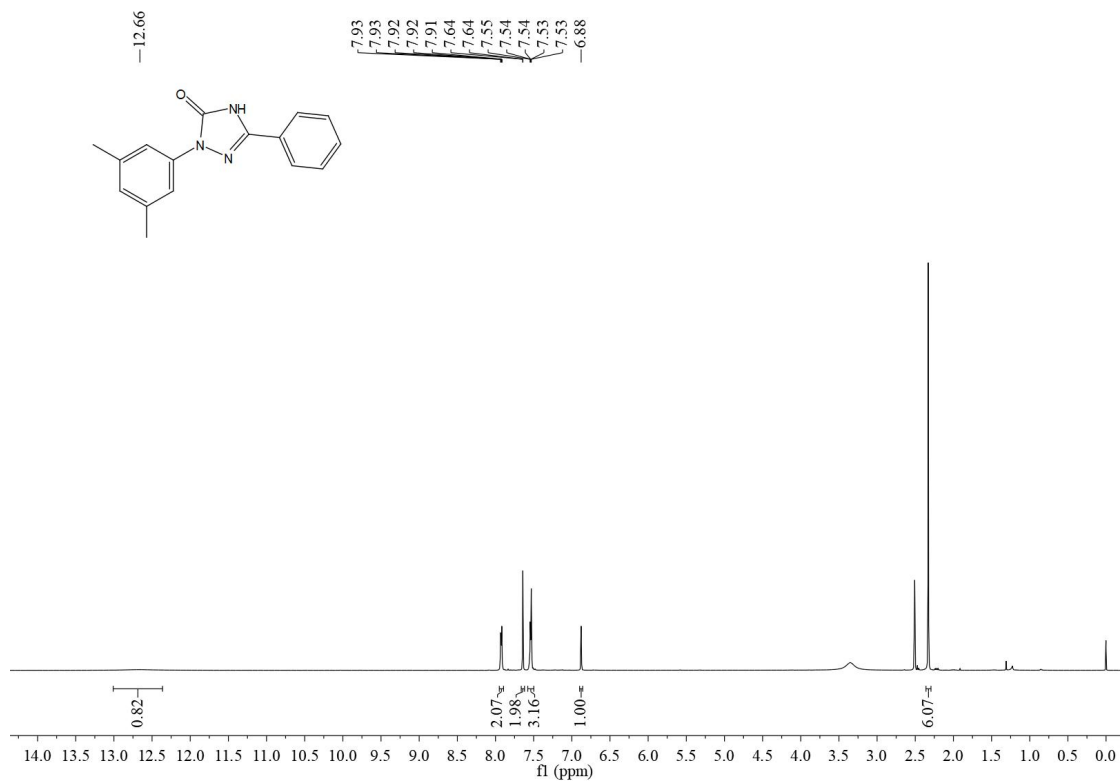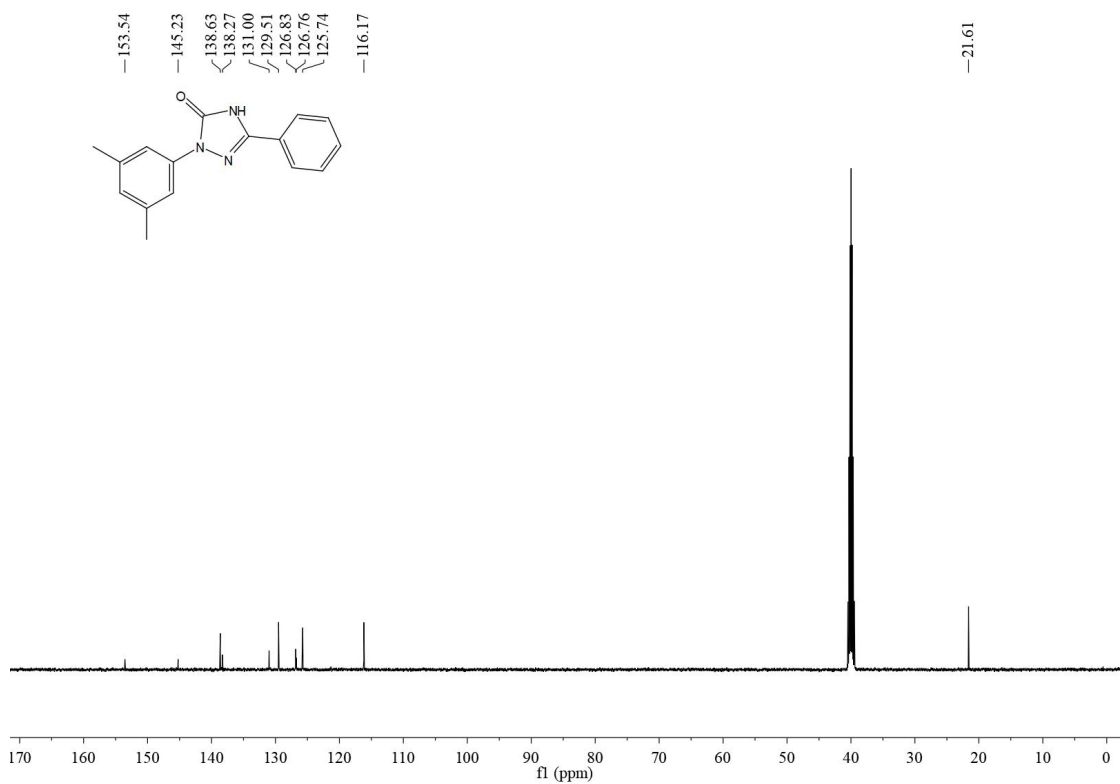



**$^1\text{H}$  and  $^{13}\text{C}$  NMR spectra of  
2-Phenethyl-5-phenyl-2,4-dihydro-3H-1,2,4-triazol-3-one (3am) (500 MHz,  
DMSO- $d_6$ )**

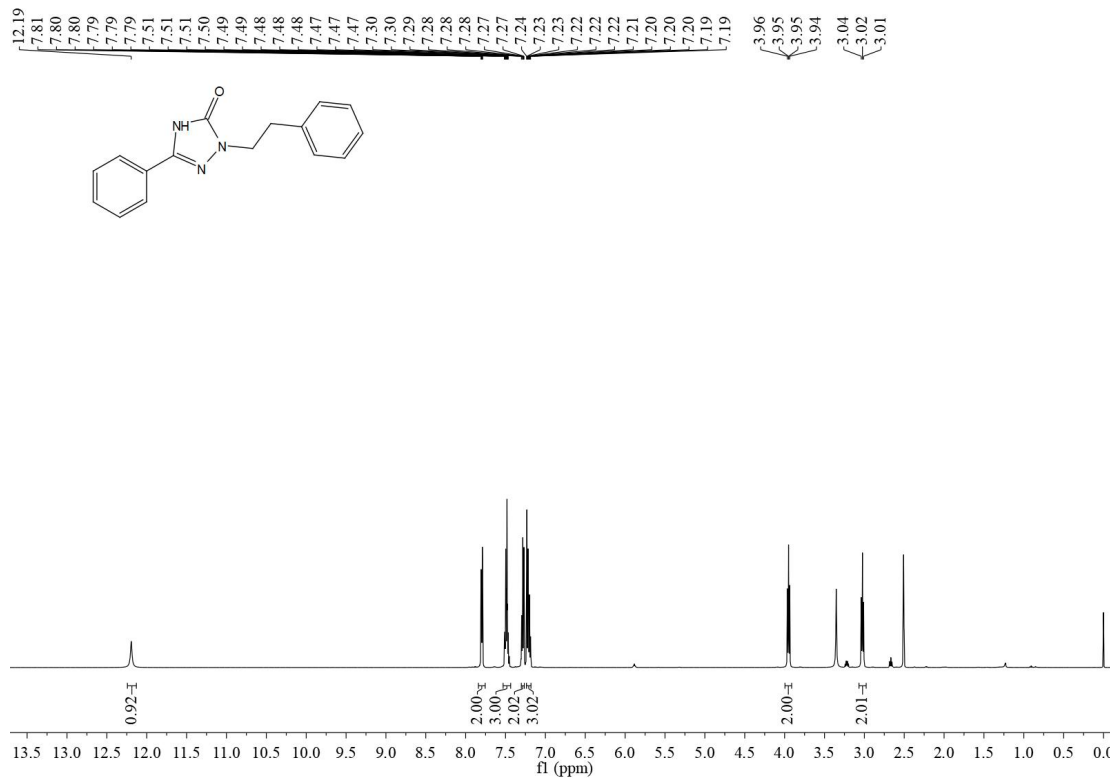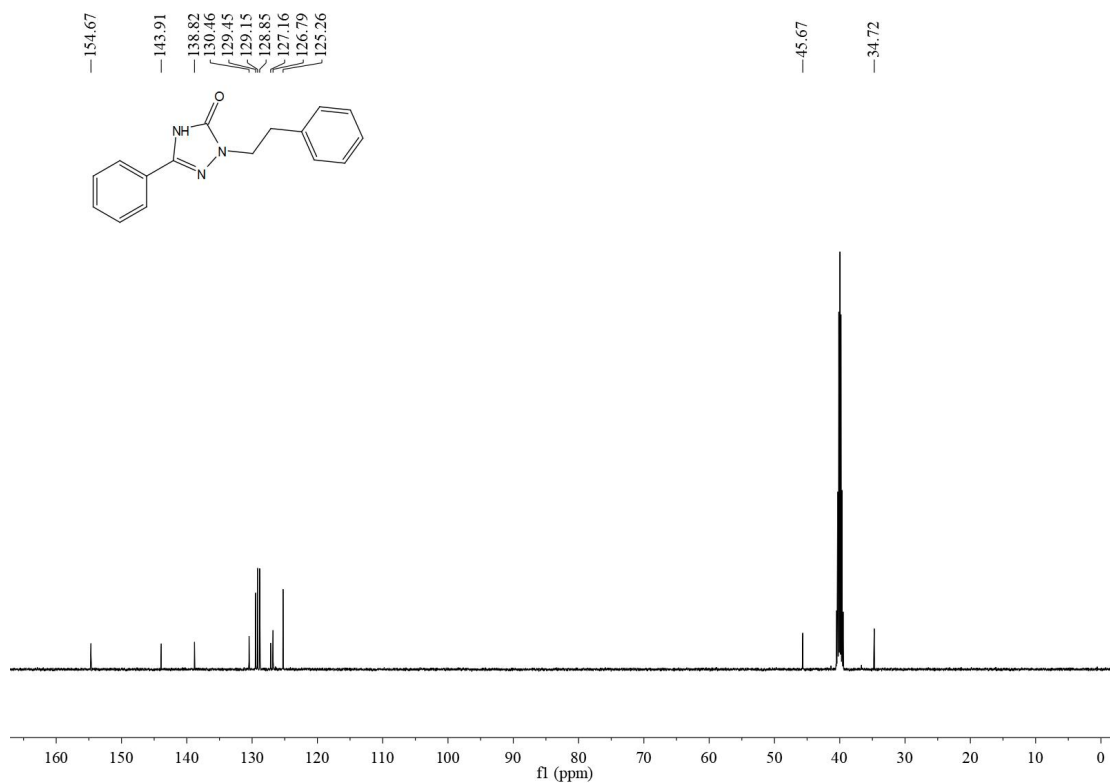

**<sup>1</sup>H and <sup>13</sup>C NMR spectra of 2-Ethyl-5-phenyl-2,4-dihydro-3H-1,2,4-triazol-3-one (3an) (500 MHz, DMSO-*d*<sub>6</sub>)**

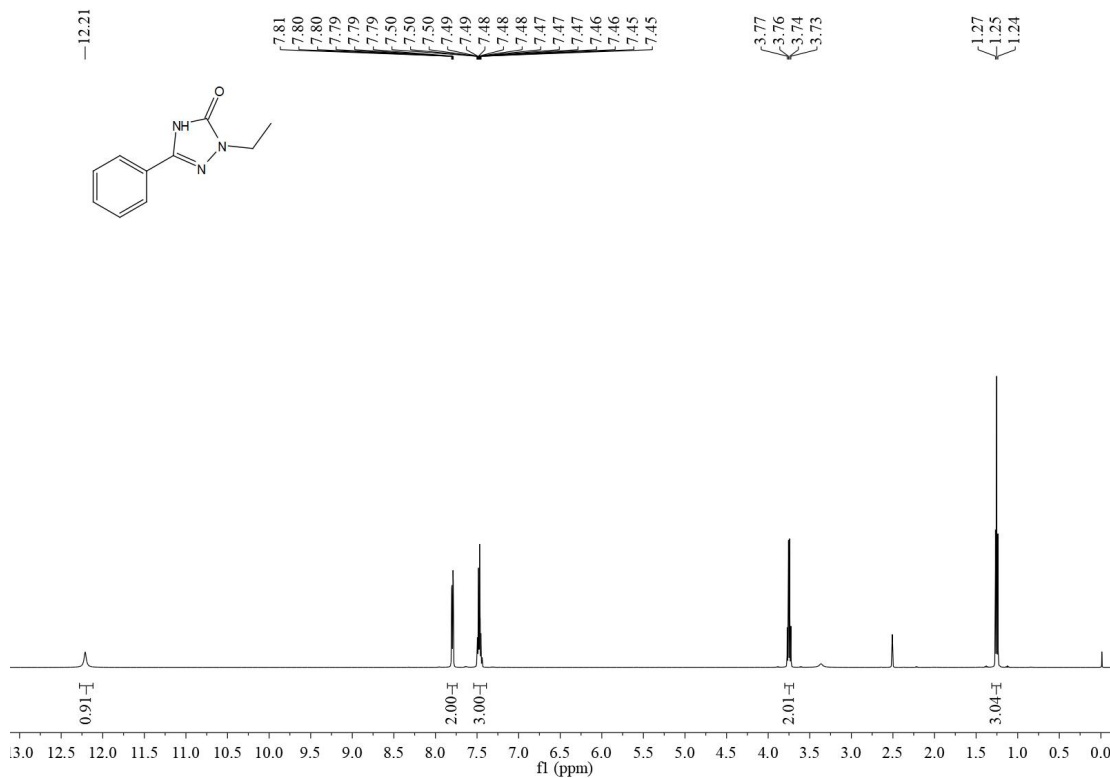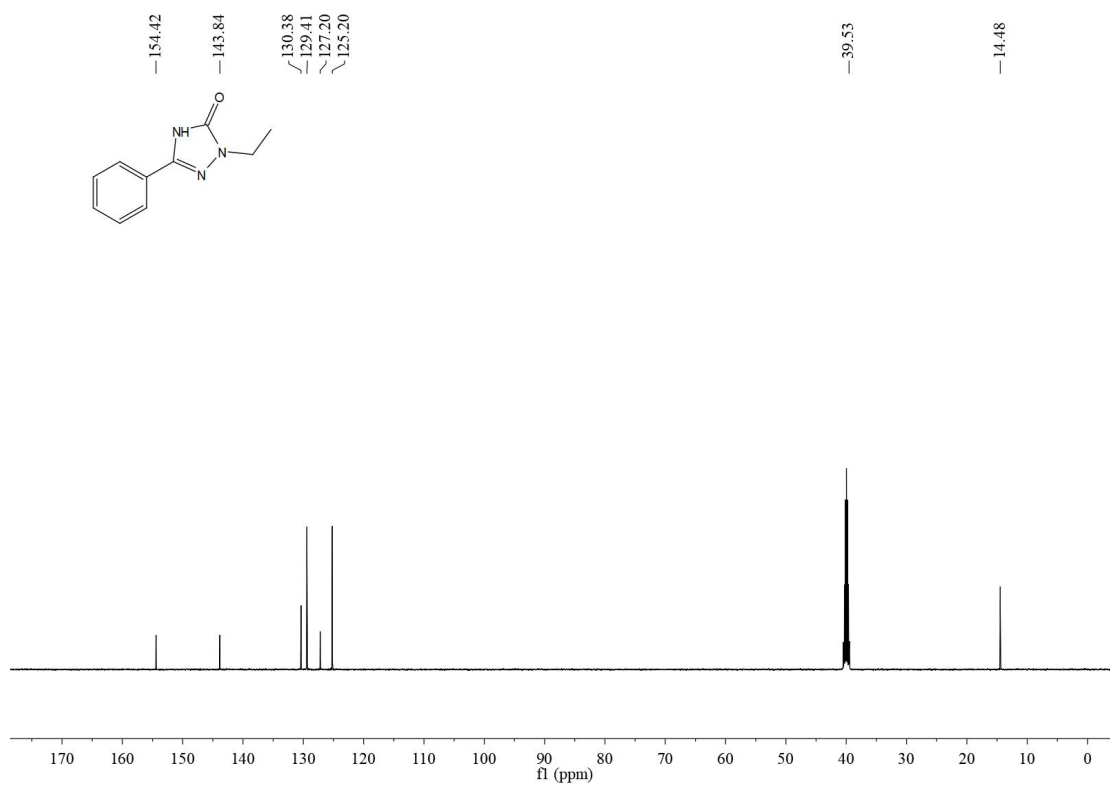

**<sup>1</sup>H and <sup>13</sup>C NMR spectra of  
5-Phenyl-2-propyl-2,4-dihydro-3H-1,2,4-triazol-3-one (3ao) (500 MHz,  
DMSO-*d*<sub>6</sub>)**

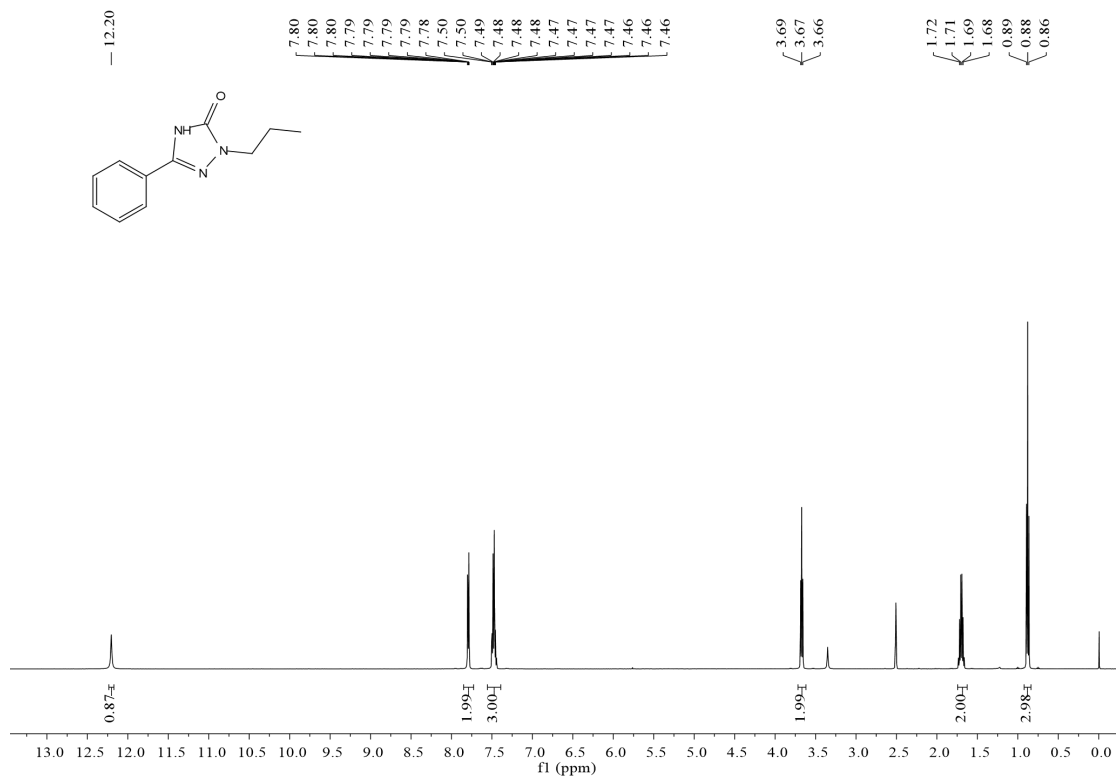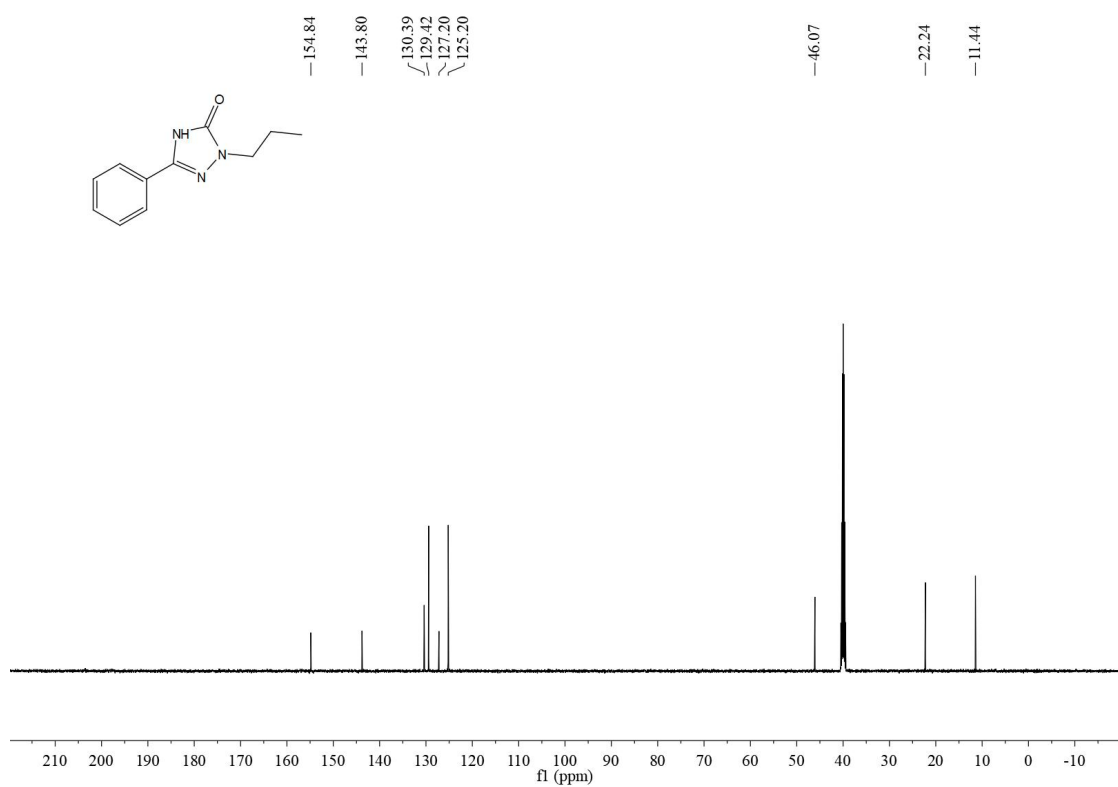

**<sup>1</sup>H and <sup>13</sup>C NMR spectra of  
2-Isopropyl-5-phenyl-2,4-dihydro-3H-1,2,4-triazol-3-one (3ap) (500 MHz,  
DMSO-*d*<sub>6</sub>)**

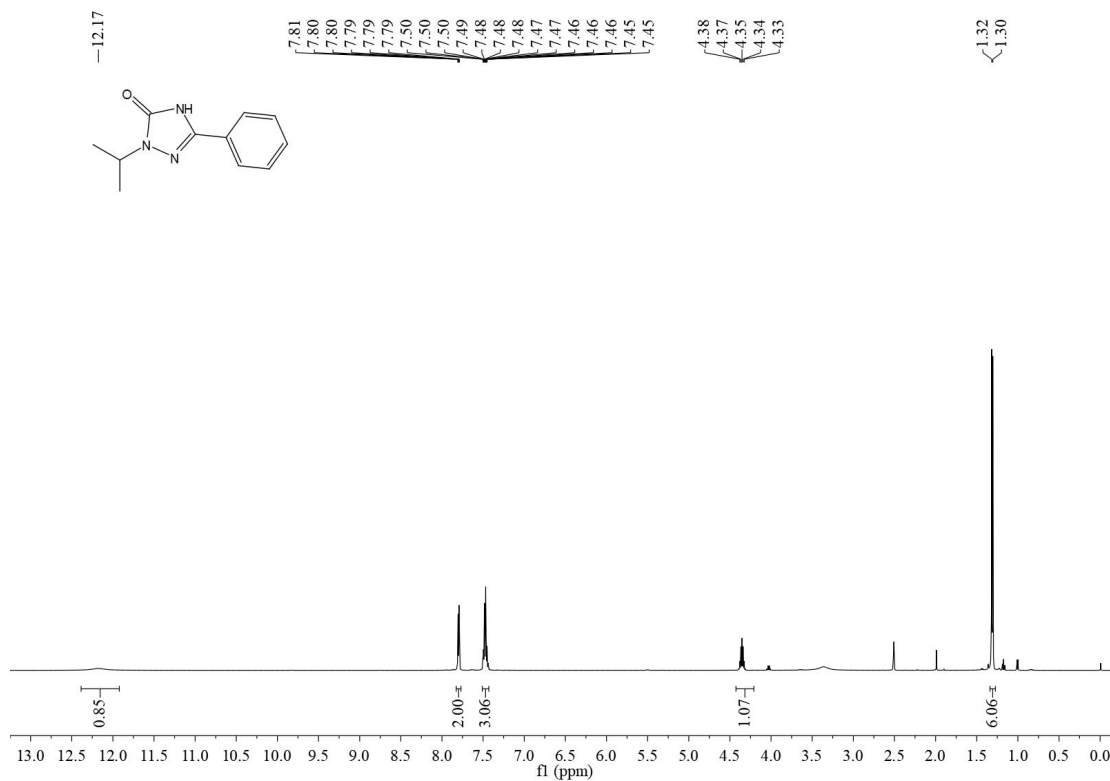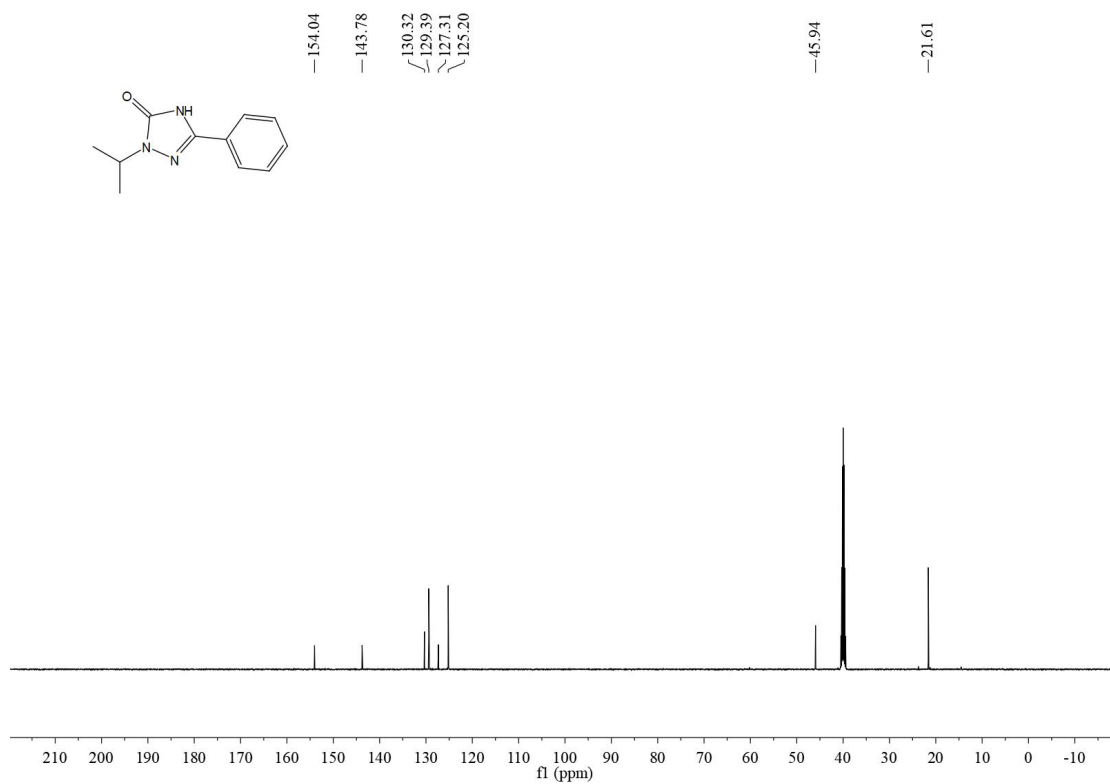

**<sup>1</sup>H and <sup>13</sup>C NMR spectra of 2-Butyl-5-phenyl-2,4-dihydro-3H-1,2,4-triazol-3-one  
(3aq) (500 MHz, CDCl<sub>3</sub>)**

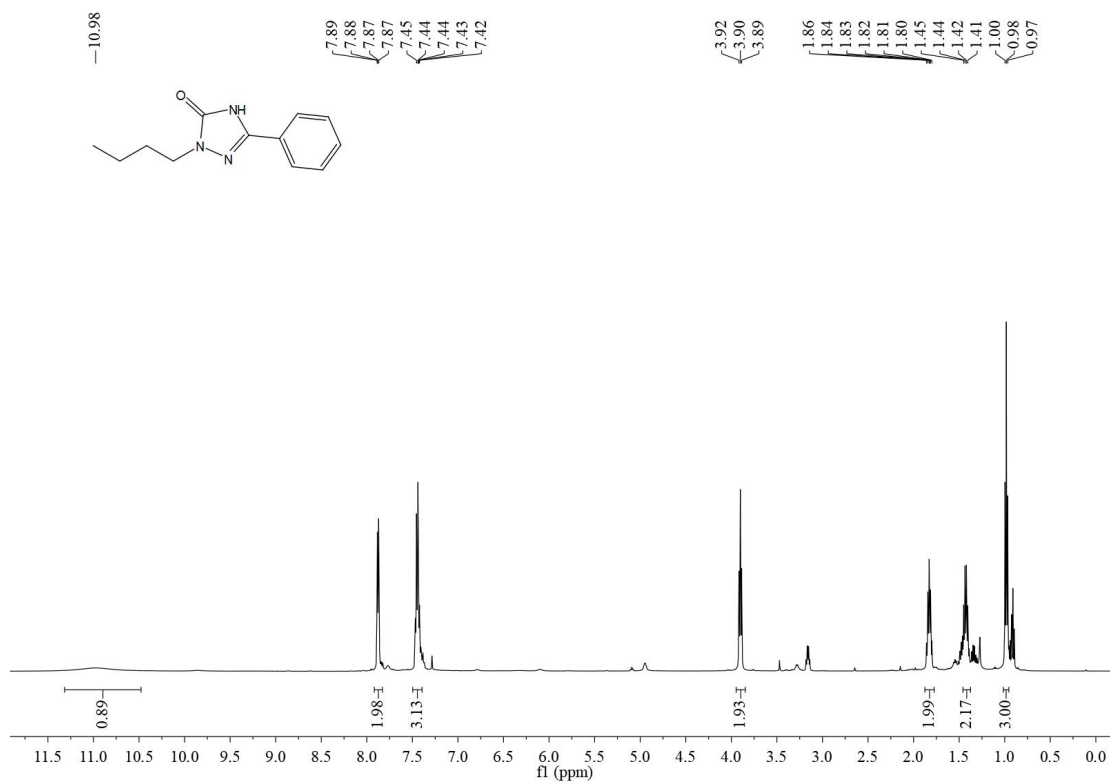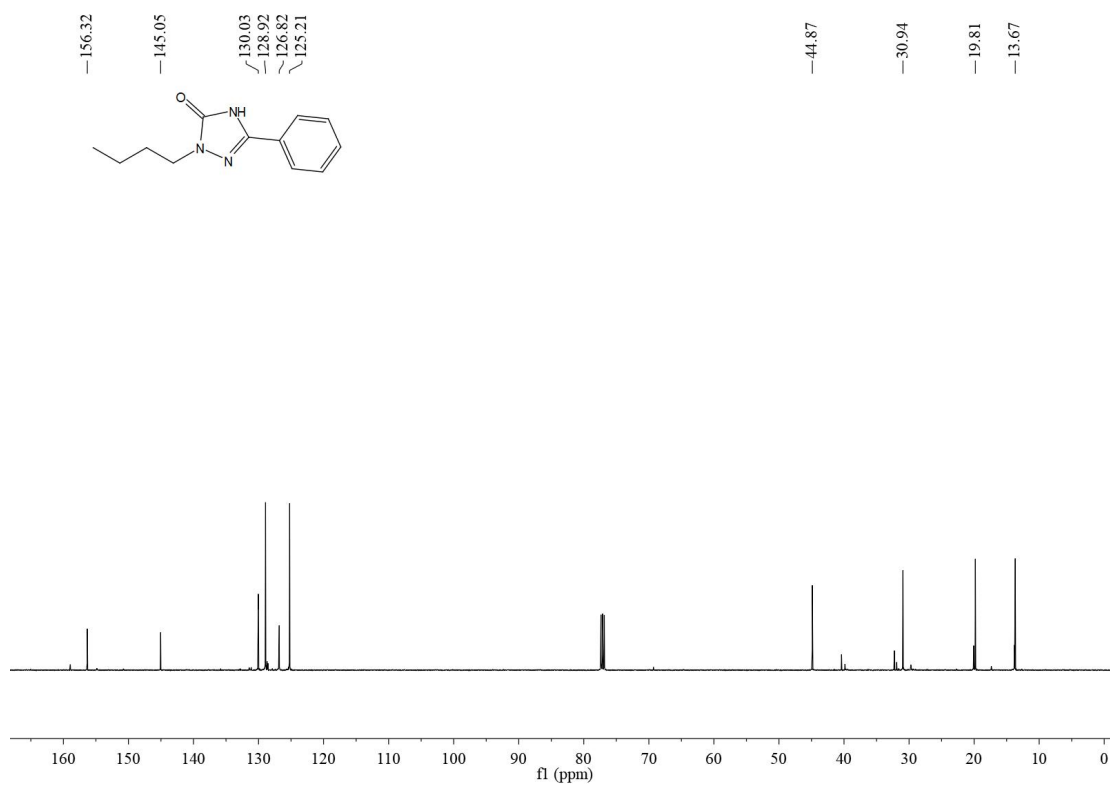

**$^1\text{H}$  and  $^{13}\text{C}$  NMR spectra of  
2-Cyclohexyl-5-phenyl-2,4-dihydro-3H-1,2,4-triazol-3-one (3ar) (500 MHz,  
DMSO- $d_6$ )**

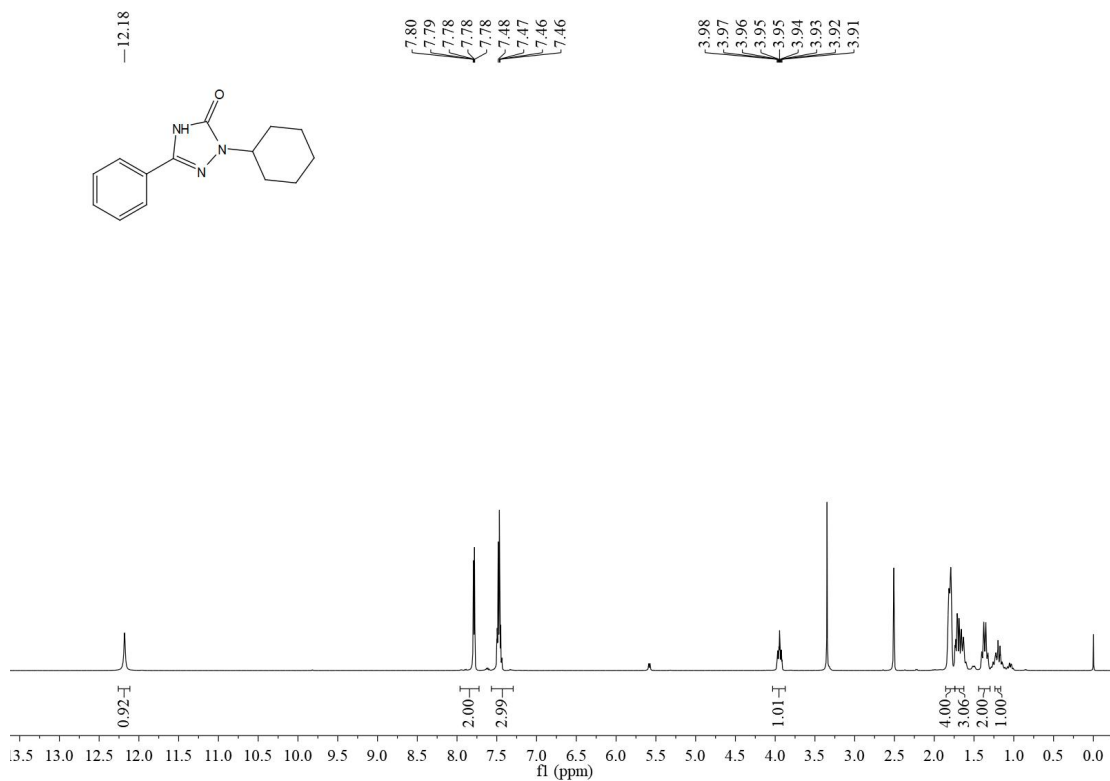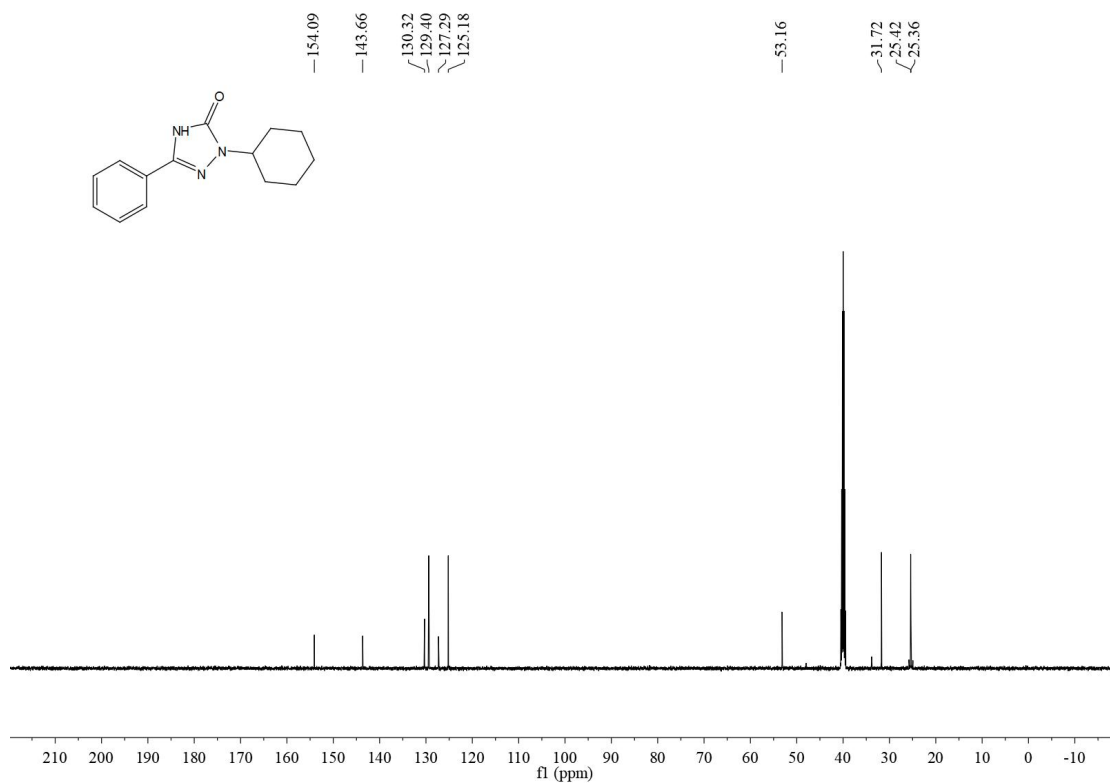

**<sup>1</sup>H and <sup>13</sup>C NMR spectra of 2,5-Di-p-tolyl-2,4-dihydro-3H-1,2,4-triazol-3-one (3ba) (500 MHz, DMSO-*d*<sub>6</sub>)**

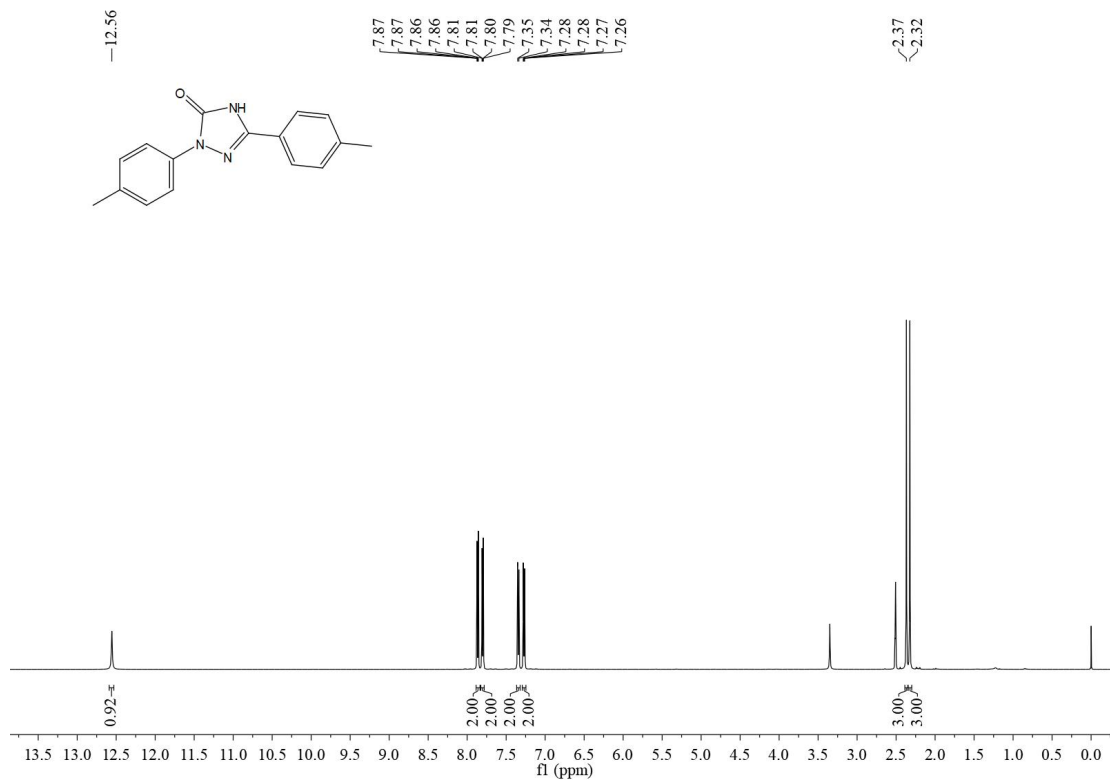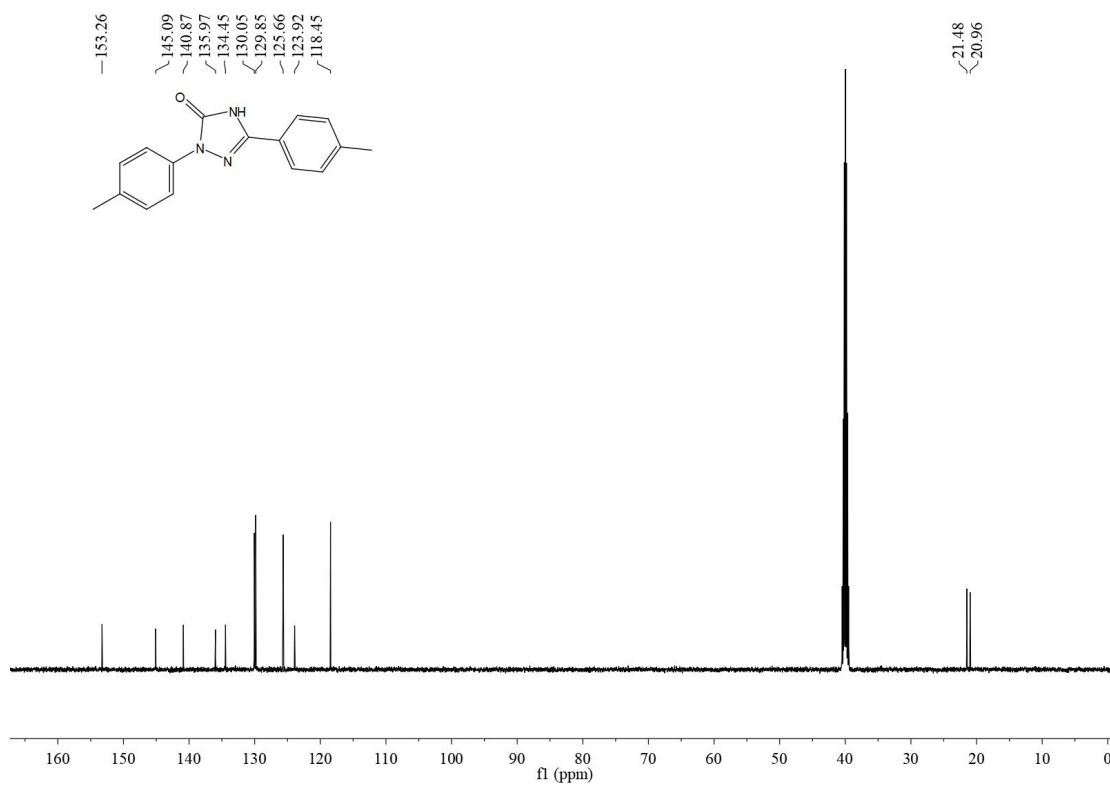

**<sup>1</sup>H and <sup>13</sup>C NMR spectra of  
5-(4-Methoxyphenyl)-2-(p-tolyl)-2,4-dihydro-3H-1,2,4-triazol-3-one (3bb) (500  
MHz, DMSO-*d*<sub>6</sub>)**

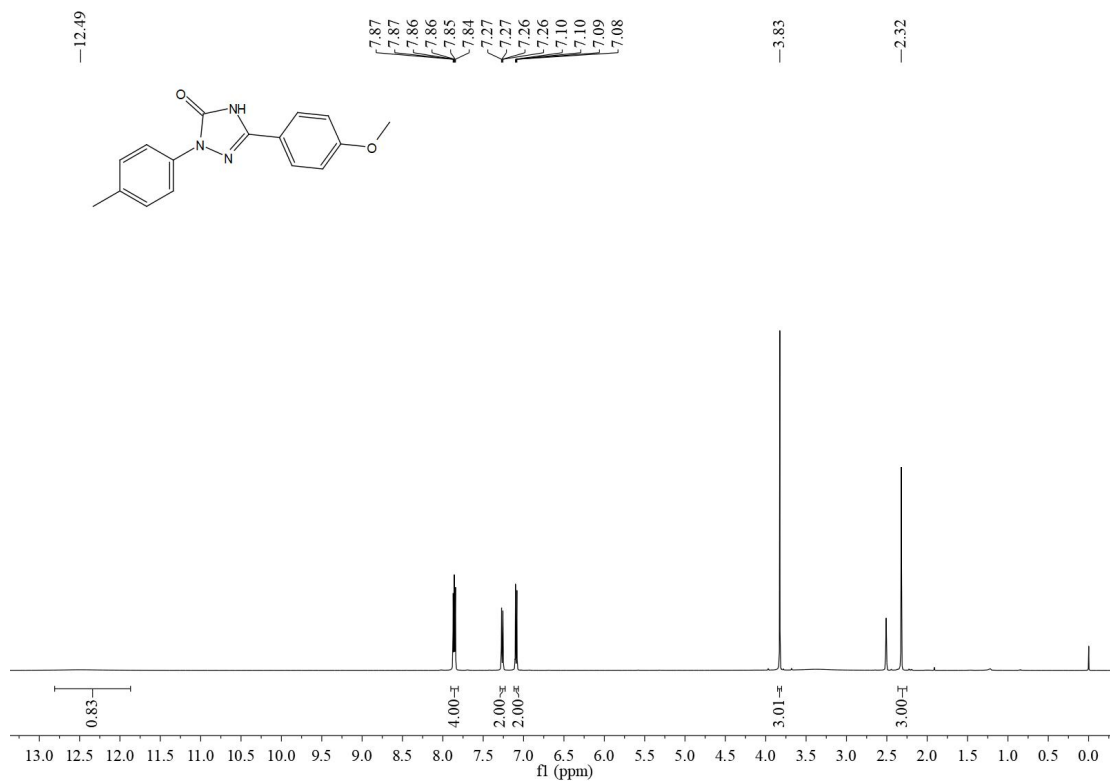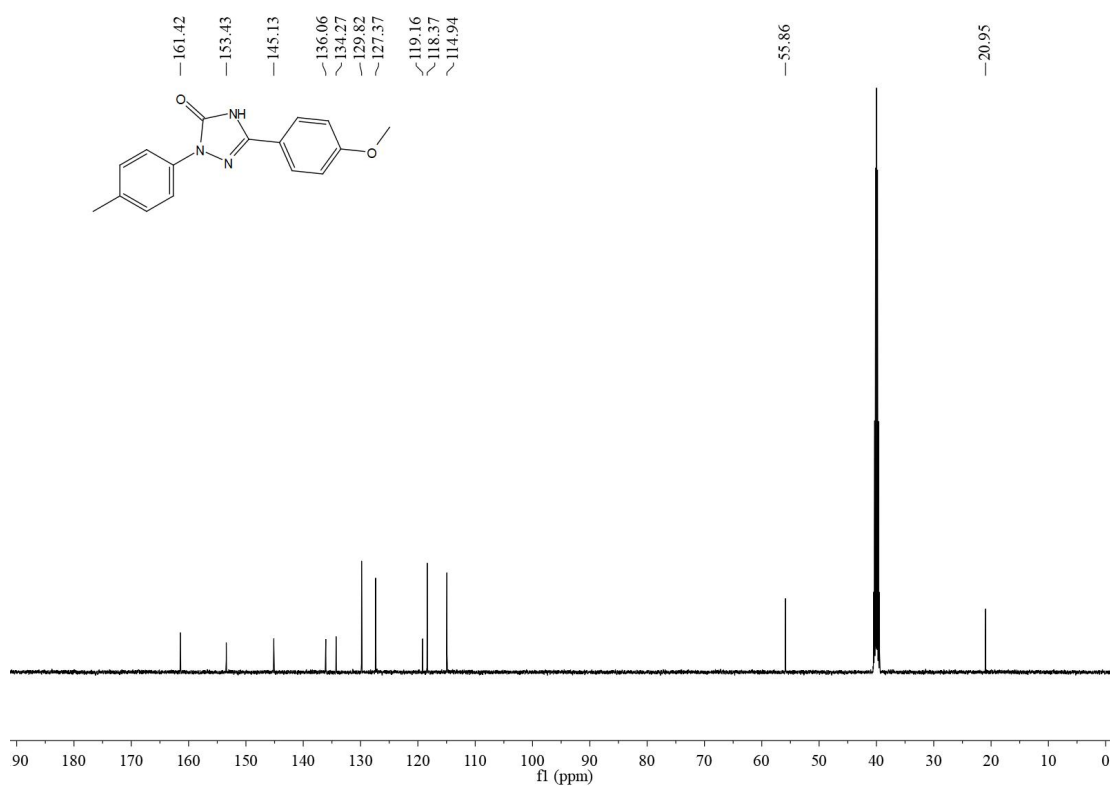



**$^1\text{H}$  and  $^{13}\text{C}$  NMR spectra of  
5-(4-Fluorophenyl)-2-(p-tolyl)-2,4-dihydro-3H-1,2,4-triazol-3-one (3bc) (500 MHz,  
DMSO- $d_6$ )**

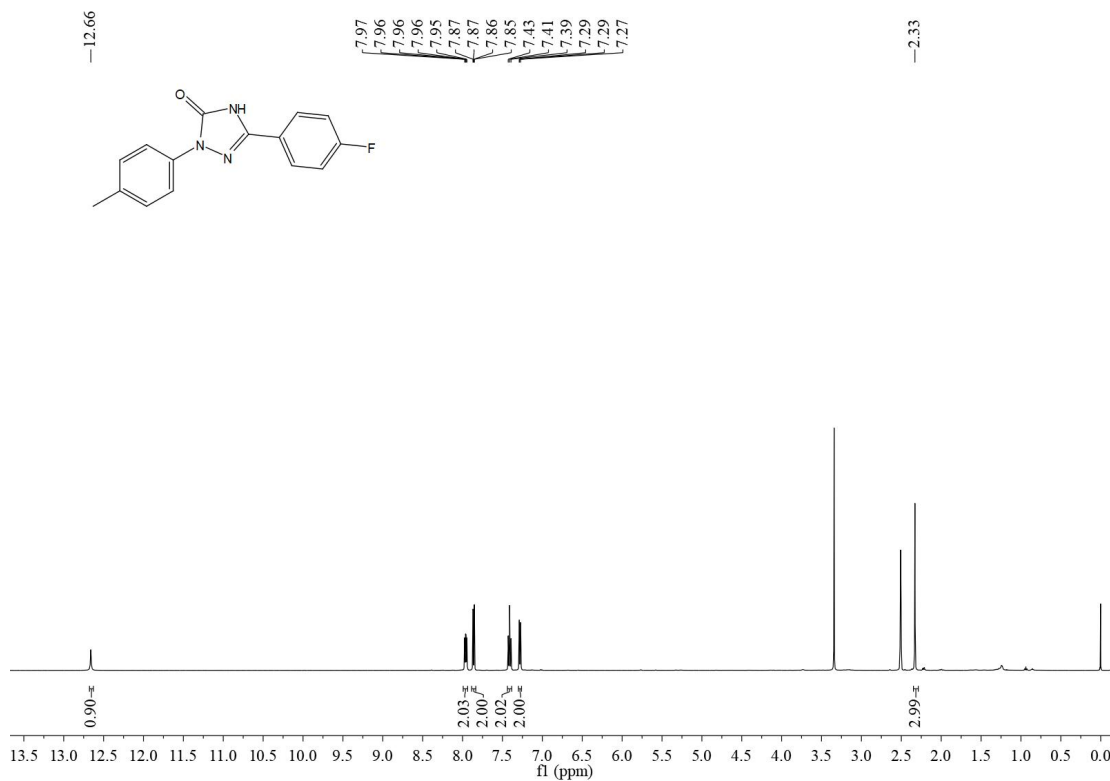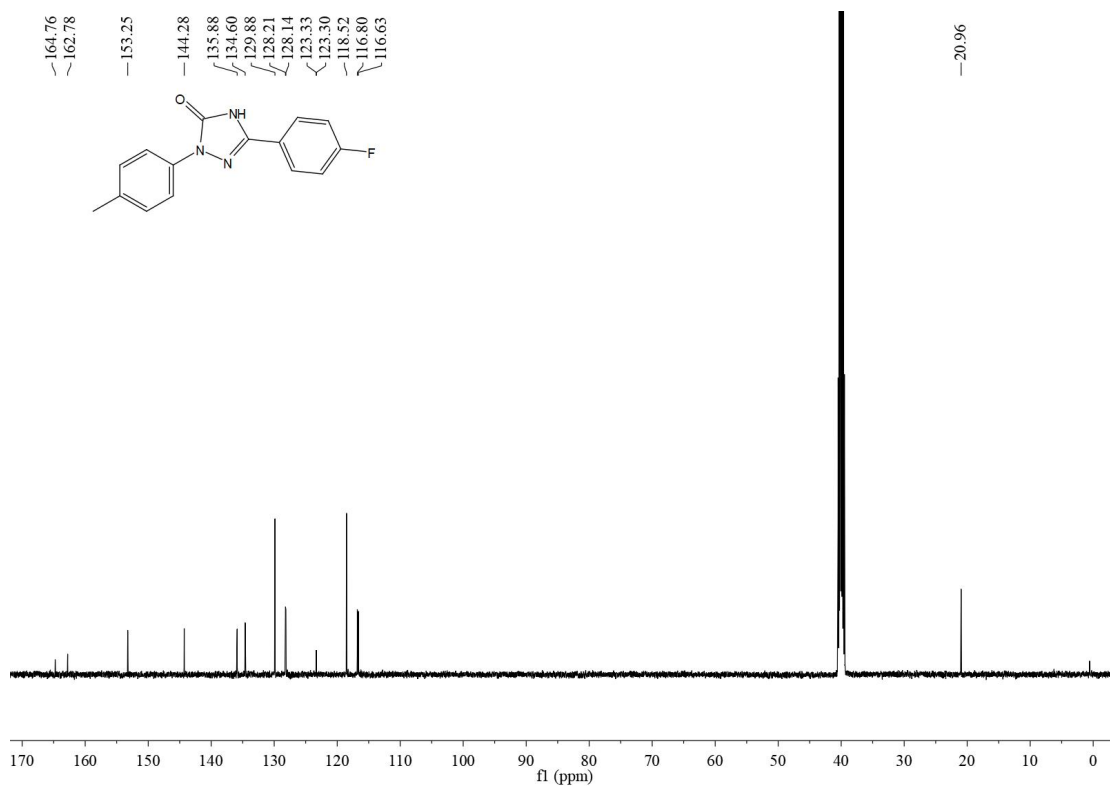

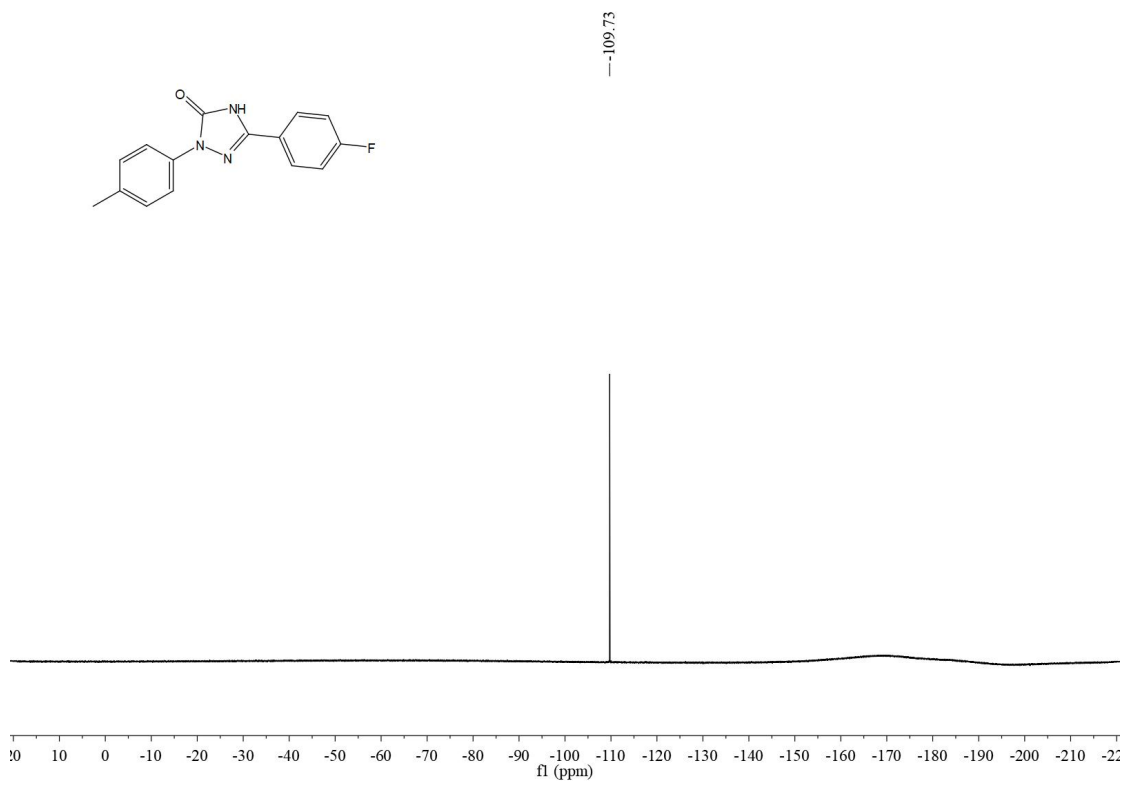

**<sup>1</sup>H and <sup>13</sup>C NMR spectra of  
5-(4-Chlorophenyl)-2-(p-tolyl)-2,4-dihydro-3H-1,2,4-triazol-3-one (3bd) (500  
MHz, DMSO-*d*<sub>6</sub>)**

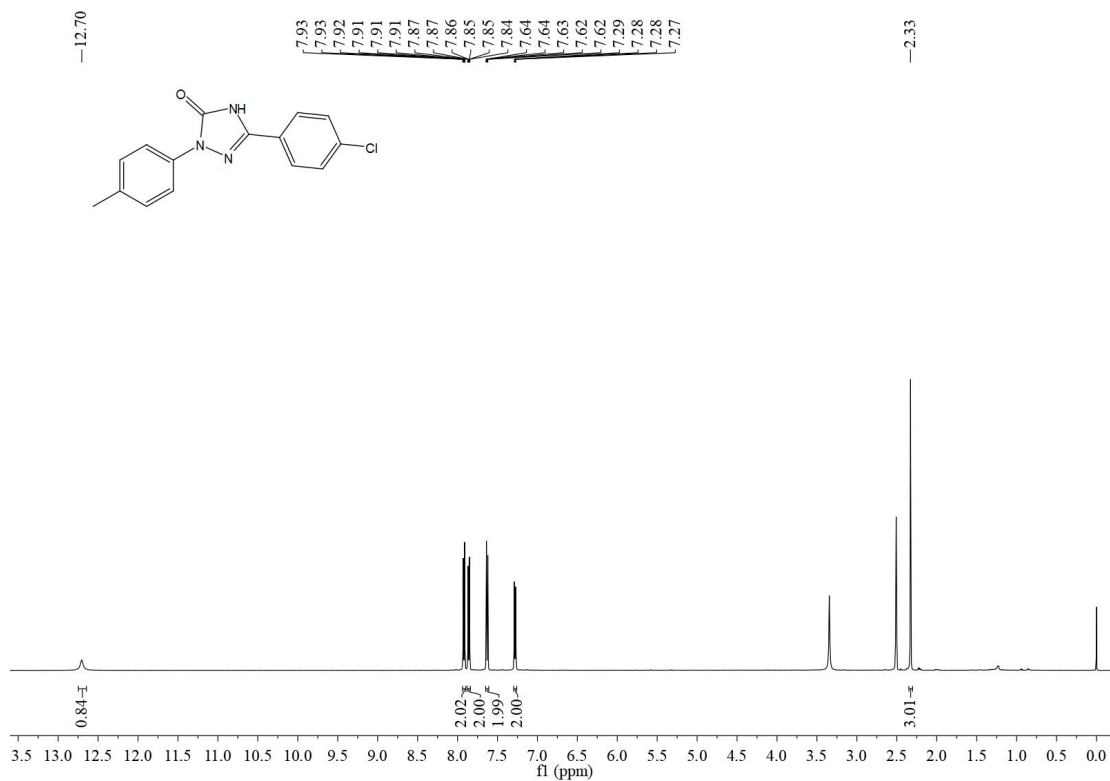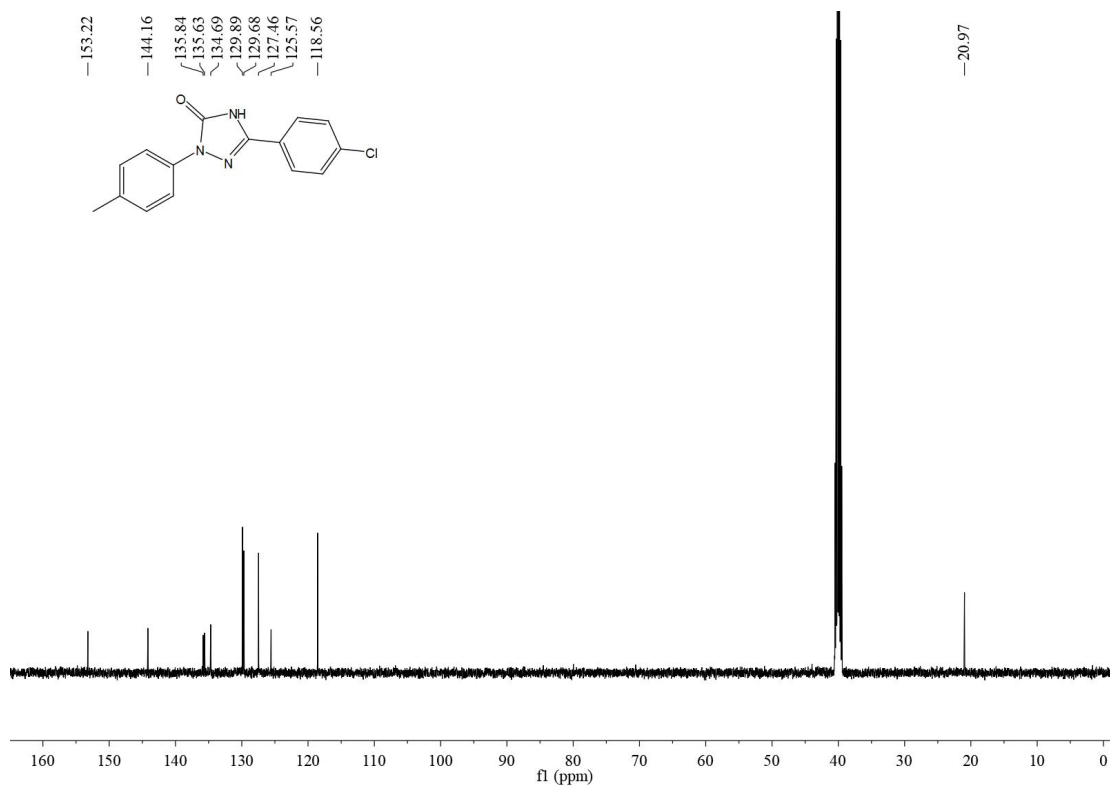

**$^1\text{H}$  and  $^{13}\text{C}$  NMR spectra of 5-(4-Iodophenyl)-2-(p-tolyl)-2,4-dihydro-3H-1,2,4-triazol-3-one (3be) (500 MHz,  $\text{DMSO-}d_6$ )**

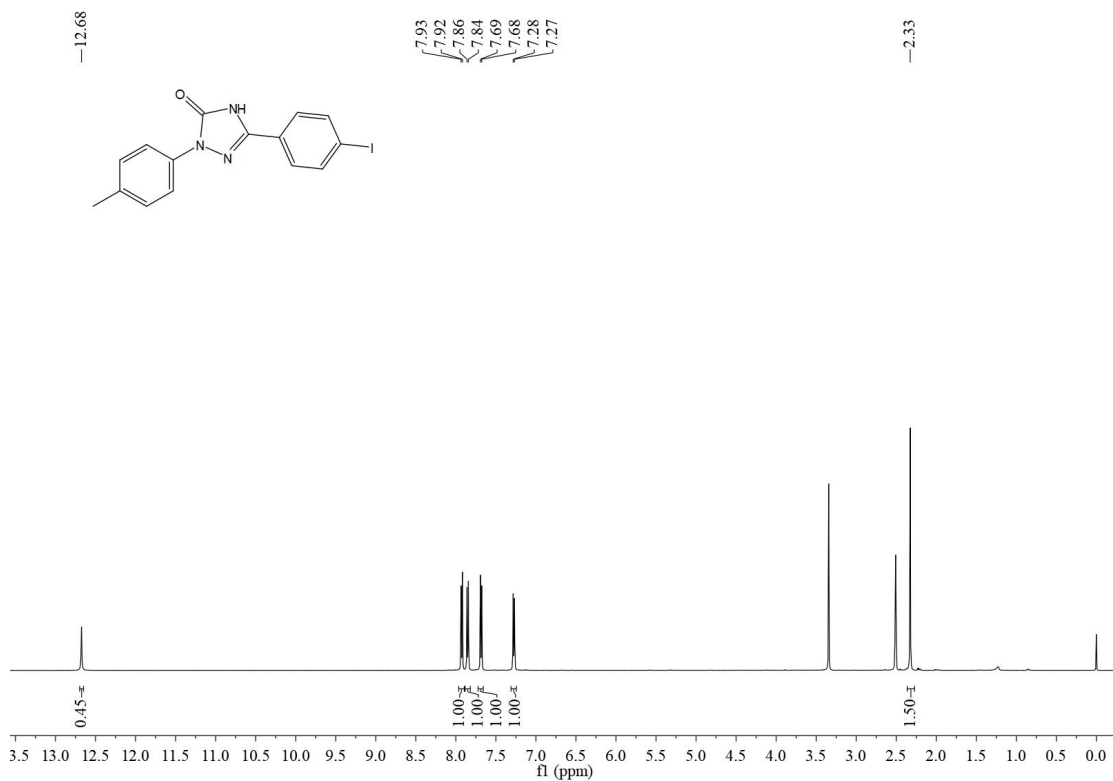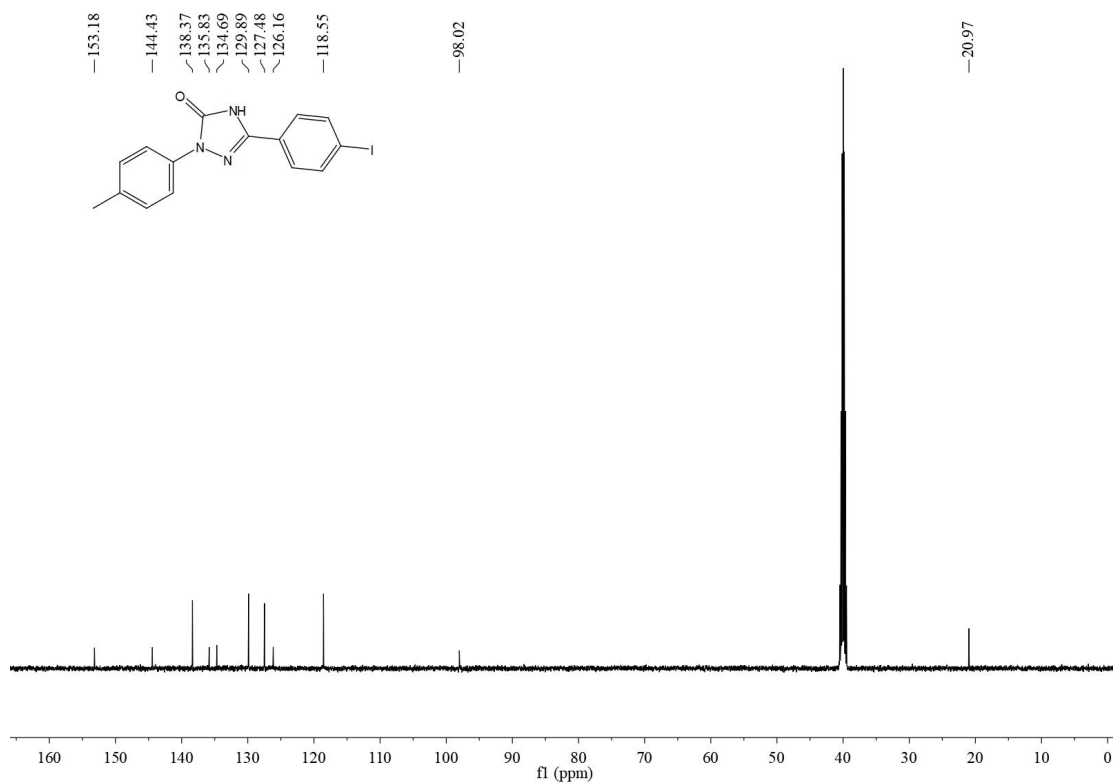

**$^1\text{H}$  and  $^{13}\text{C}$  NMR spectra of  
5-(4-Nitrophenyl)-2-(p-tolyl)-2,4-dihydro-3H-1,2,4-triazol-3-one (3bf) (500 MHz,  
DMSO- $d_6$ )**

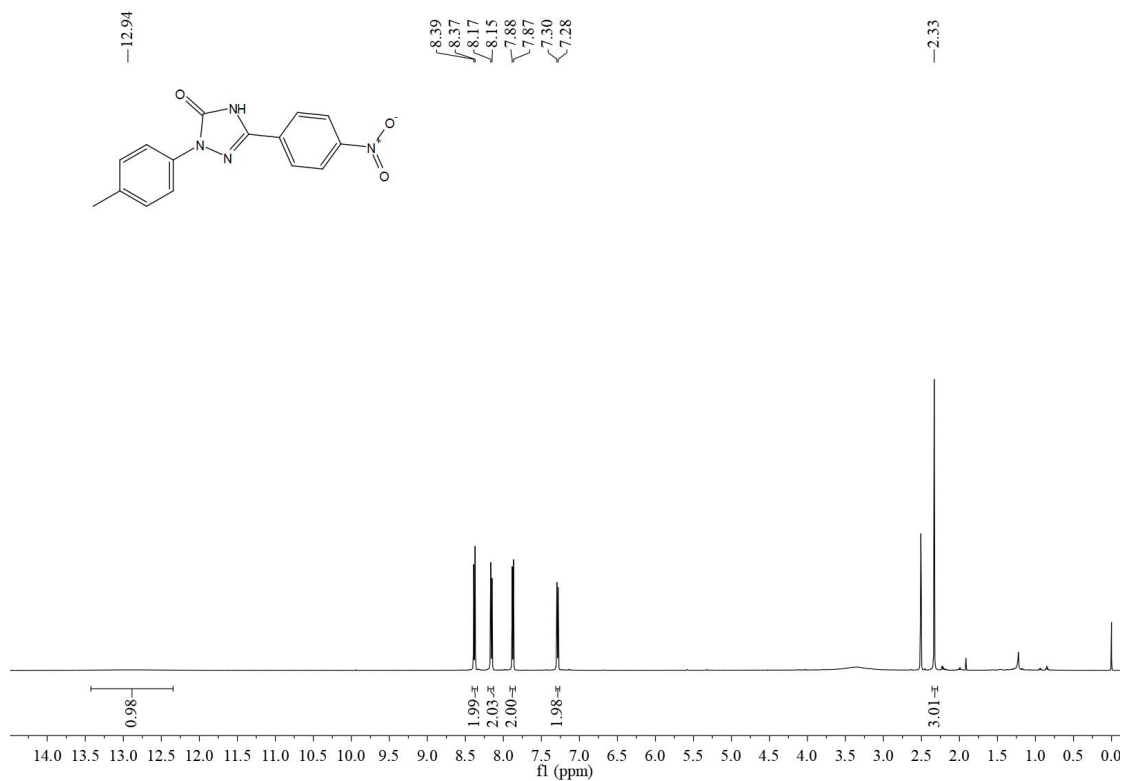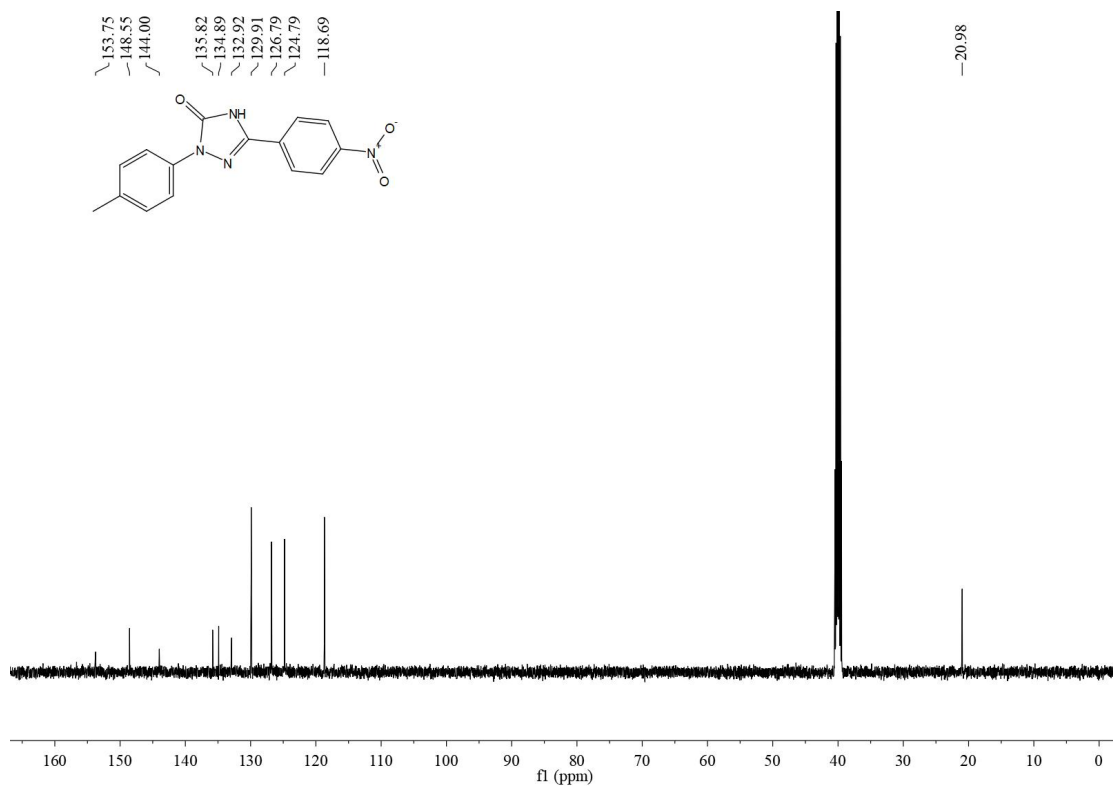

**$^1\text{H}$  and  $^{13}\text{C}$  NMR spectra of 5-(2-Ethoxyphenyl)-2-(p-tolyl)-2,4-dihydro-3H-1,2,4-triazol-3-one (3bg) (500 MHz, DMSO- $d_6$ )**

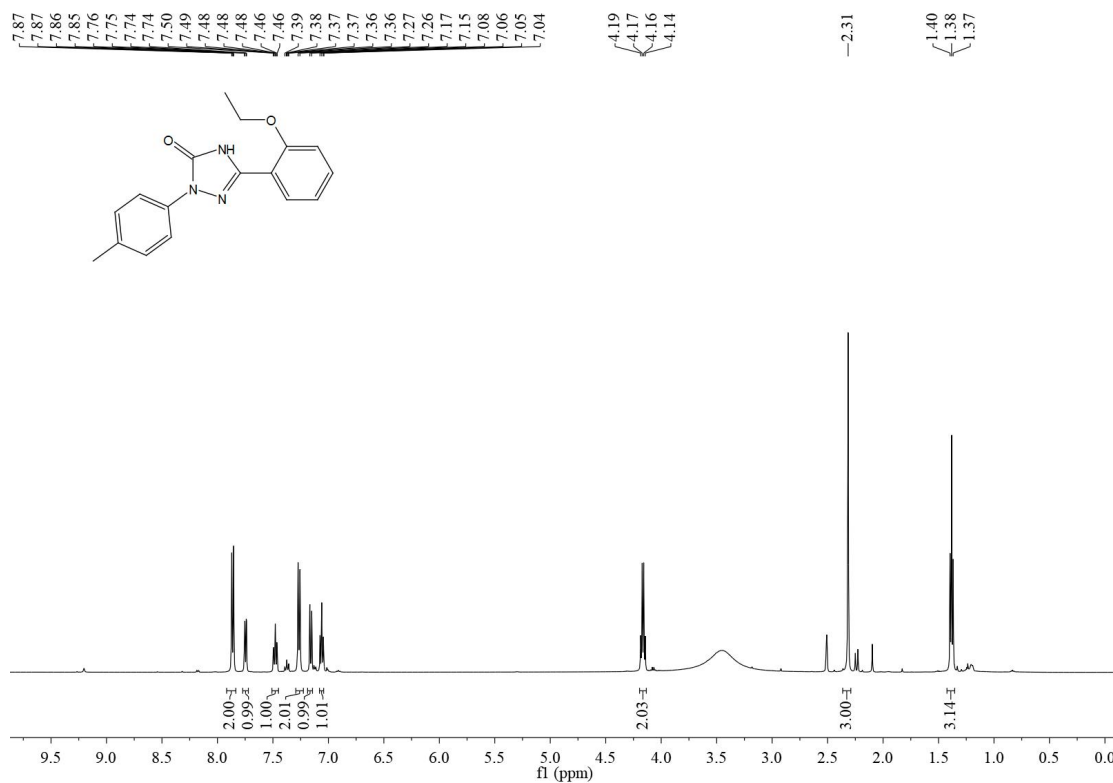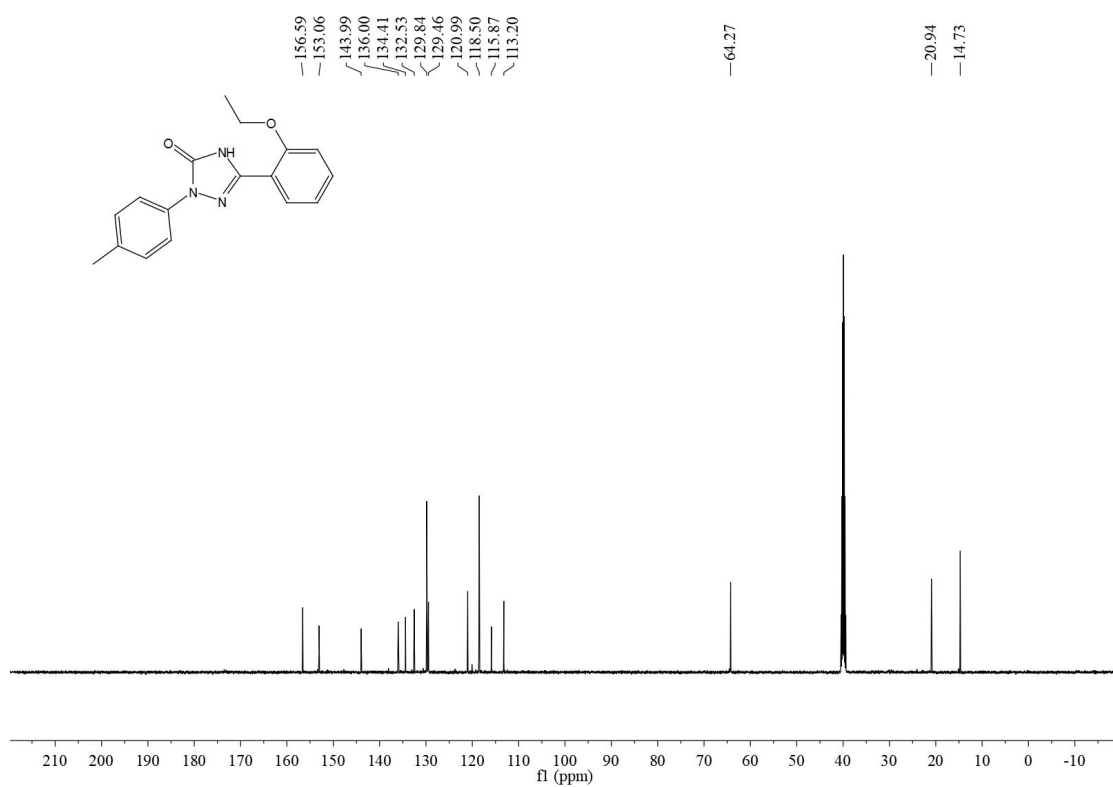

**$^1\text{H}$  and  $^{13}\text{C}$  NMR spectra of  
5-(2-Chlorophenyl)-2-(p-tolyl)-2,4-dihydro-3H-1,2,4-triazol-3-one (3bh) (500  
MHz, DMSO- $d_6$ )**

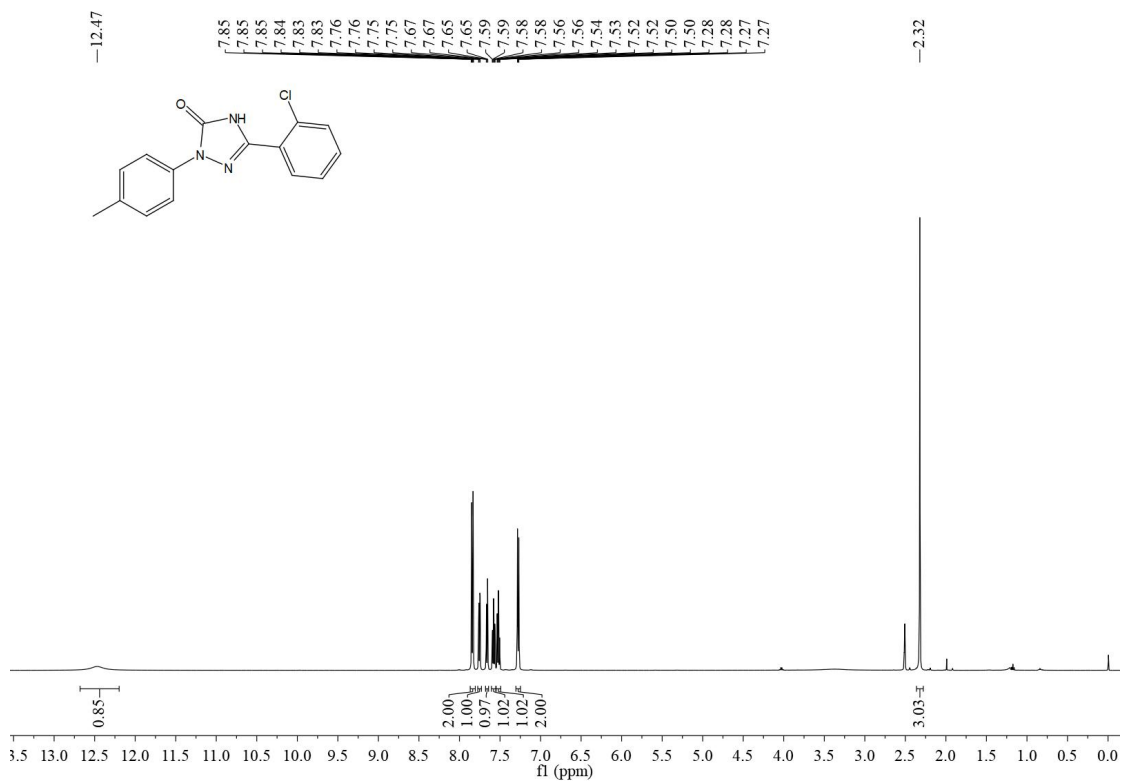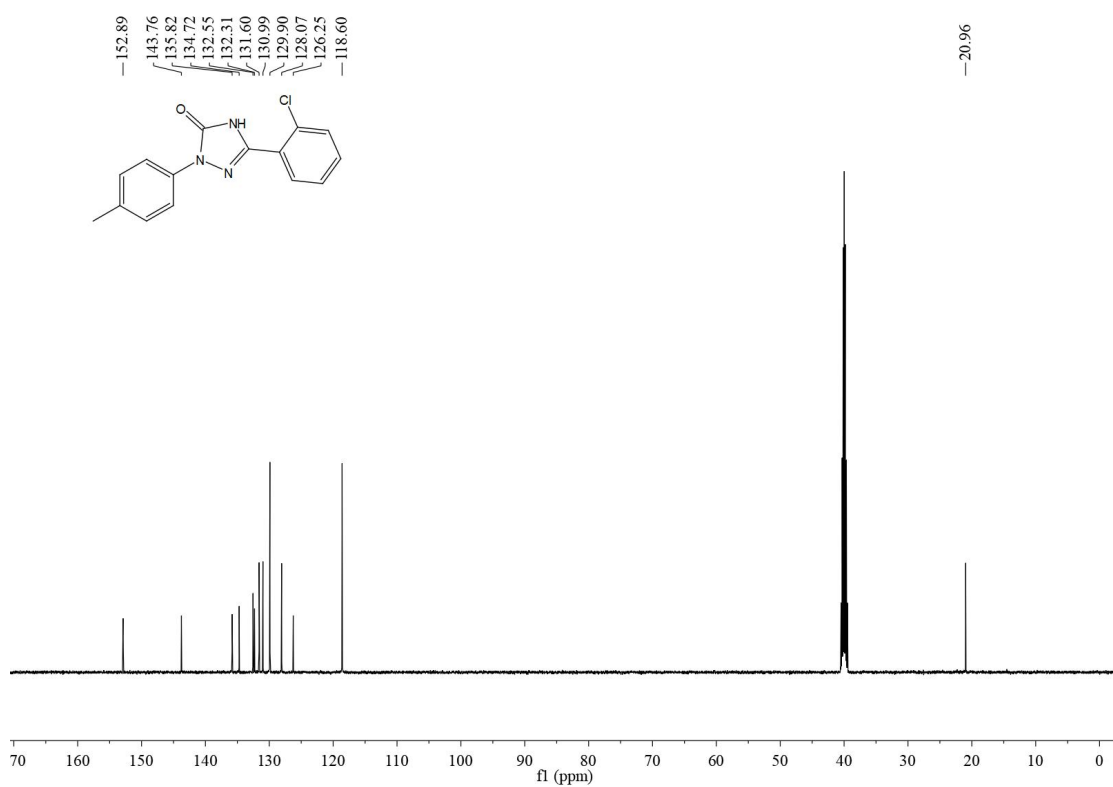





**$^1\text{H}$  and  $^{13}\text{C}$  NMR spectra of  
5-Cyclopropyl-2-(p-tolyl)-2,4-dihydro-3H-1,2,4-triazol-3-one (3bj) (500 MHz,  
DMSO- $d_6$ )**

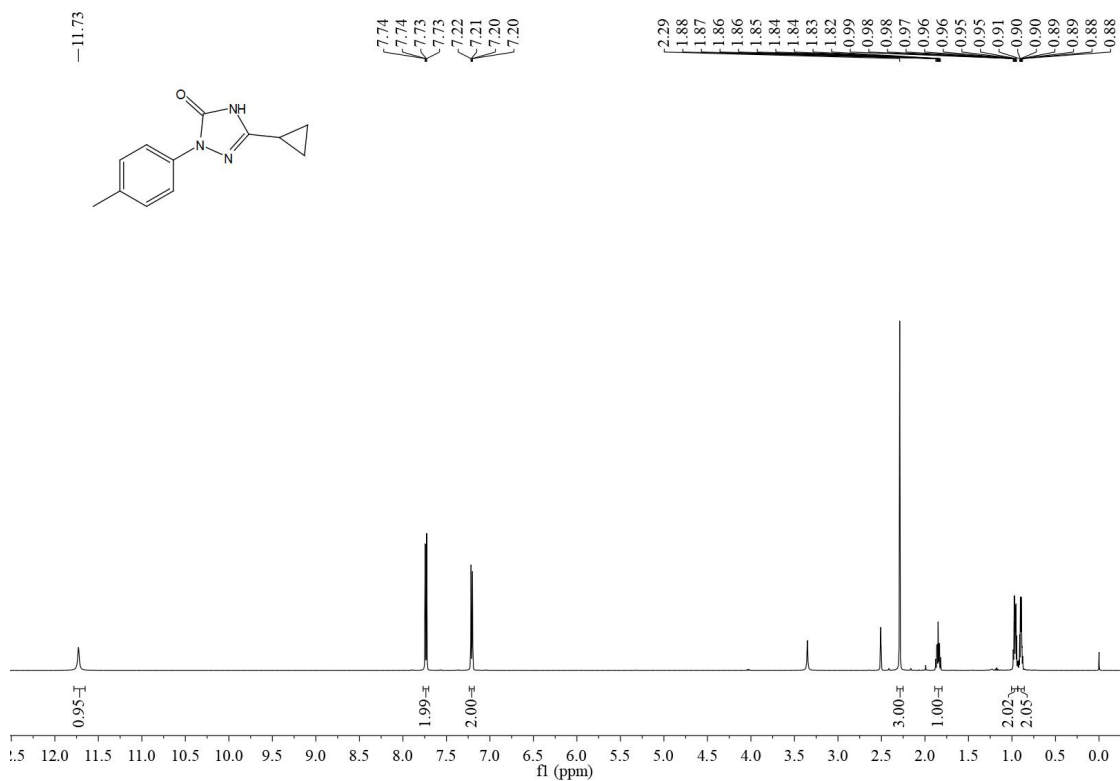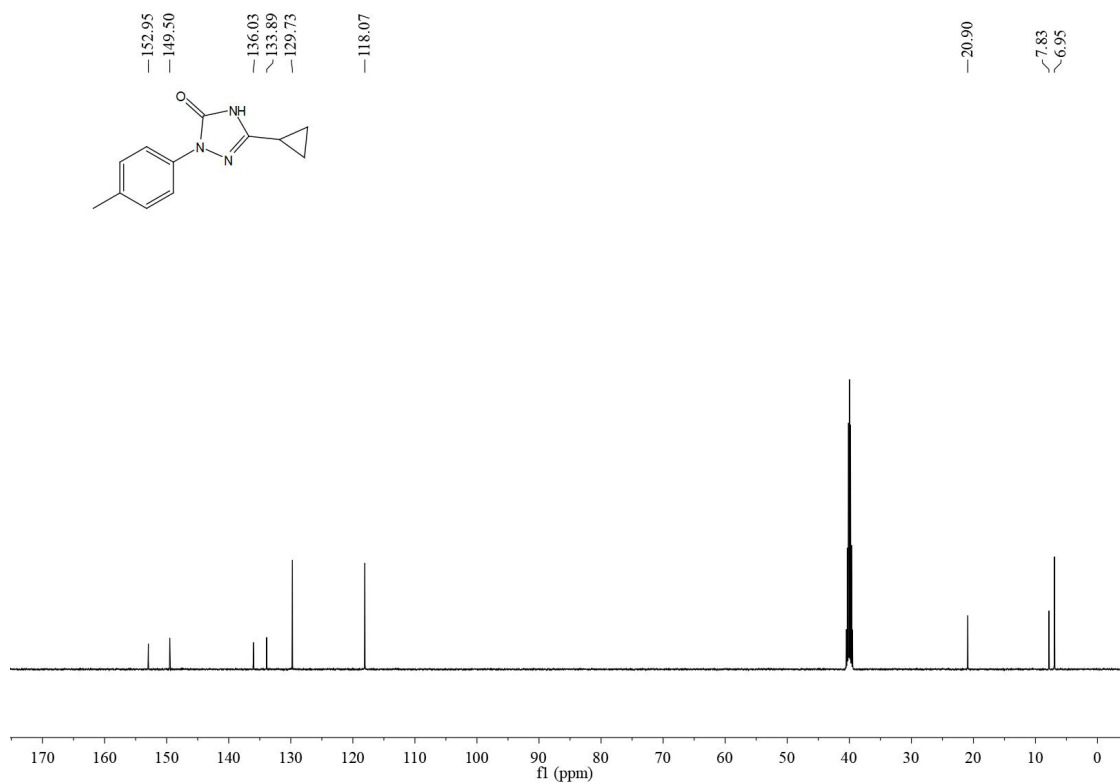

**<sup>1</sup>H and <sup>13</sup>C NMR spectra of  
5-Isopropyl-2-(p-tolyl)-2,4-dihydro-3H-1,2,4-triazol-3-one (3bk) (500 MHz,  
DMSO-d<sub>6</sub>)**

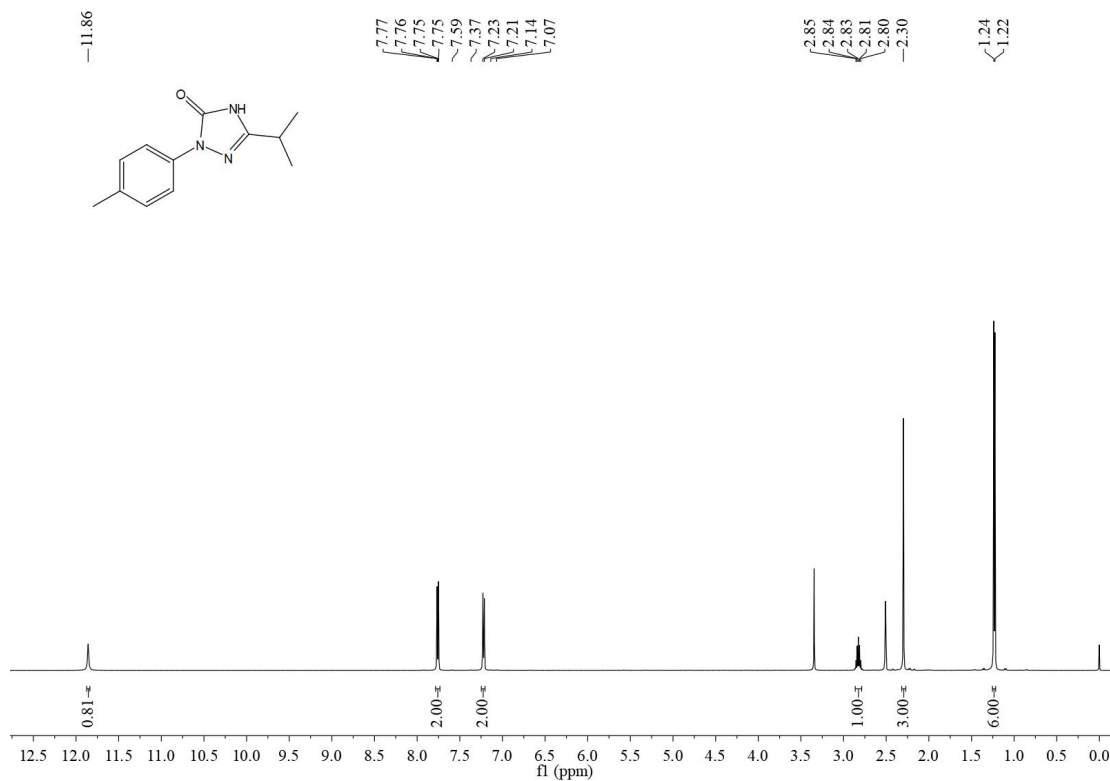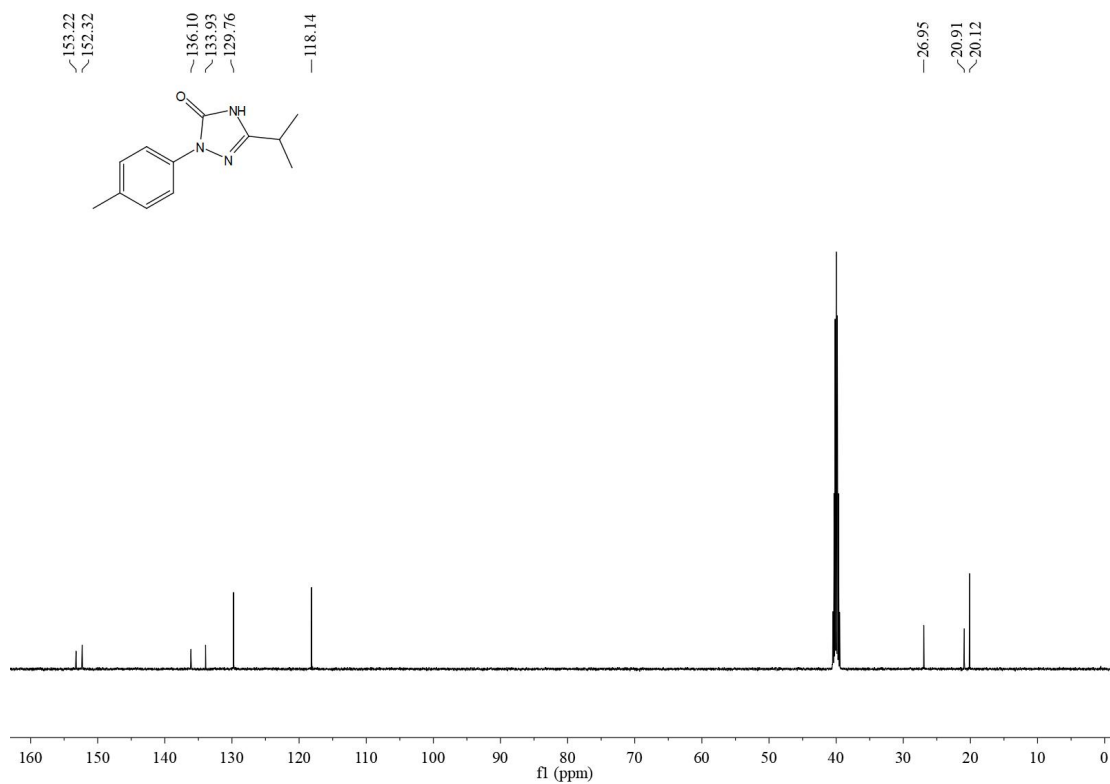

**$^1\text{H}$  and  $^{13}\text{C}$  NMR spectra of 5-Propyl-2-(p-tolyl)-2,4-dihydro-3H-1,2,4-triazol-3-one (3bl) (500 MHz, DMSO- $d_6$ )**

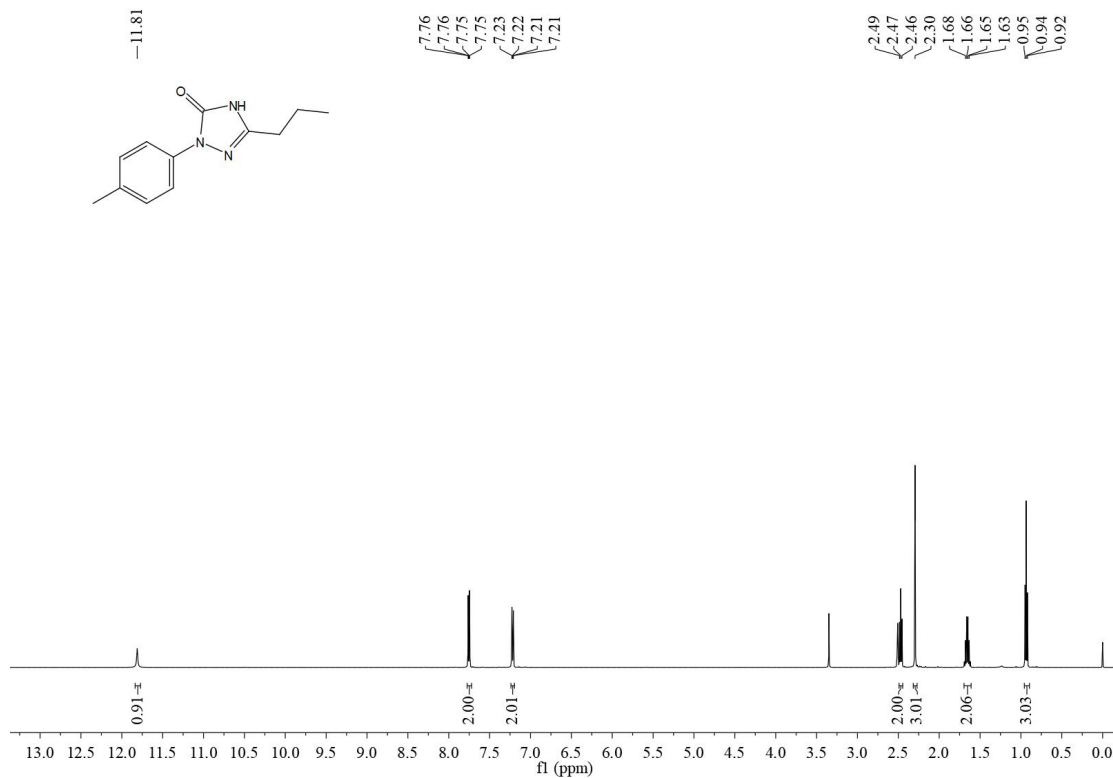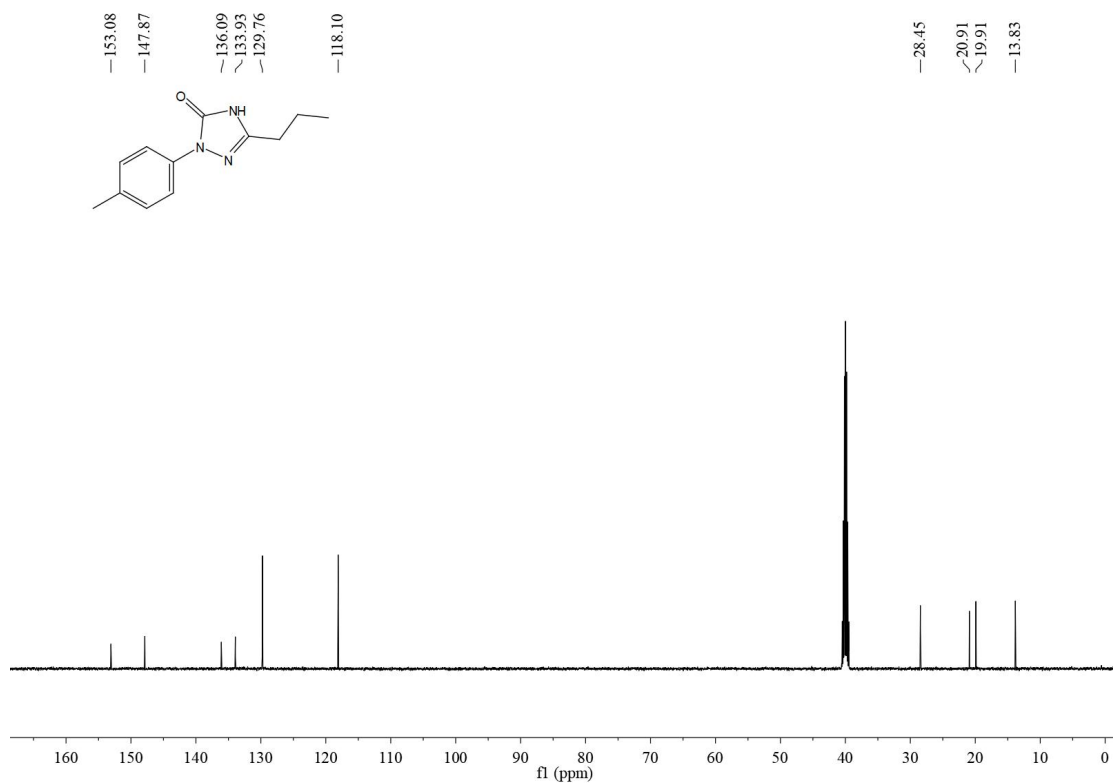

**<sup>1</sup>H and <sup>13</sup>C NMR spectra of  
4-Methyl-5-phenyl-2-(p-tolyl)-2,4-dihydro-3H-1,2,4-triazol-3-one (4a) (500 MHz,  
CDCl<sub>3</sub>)**

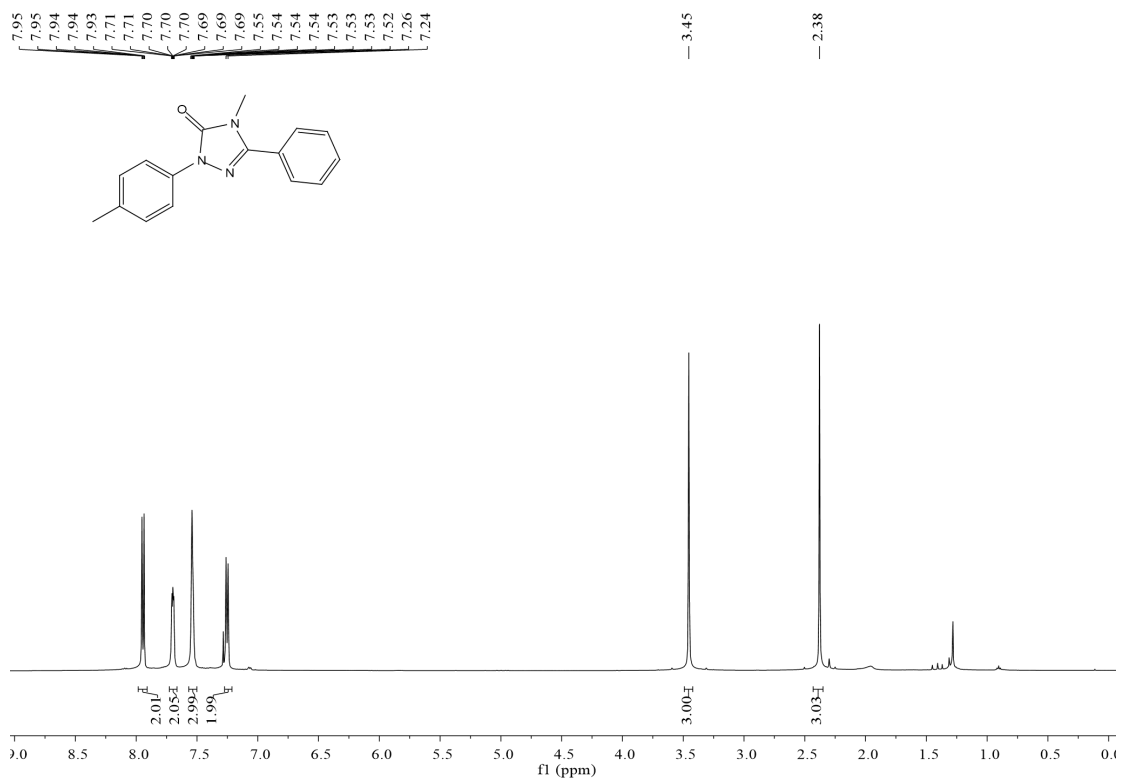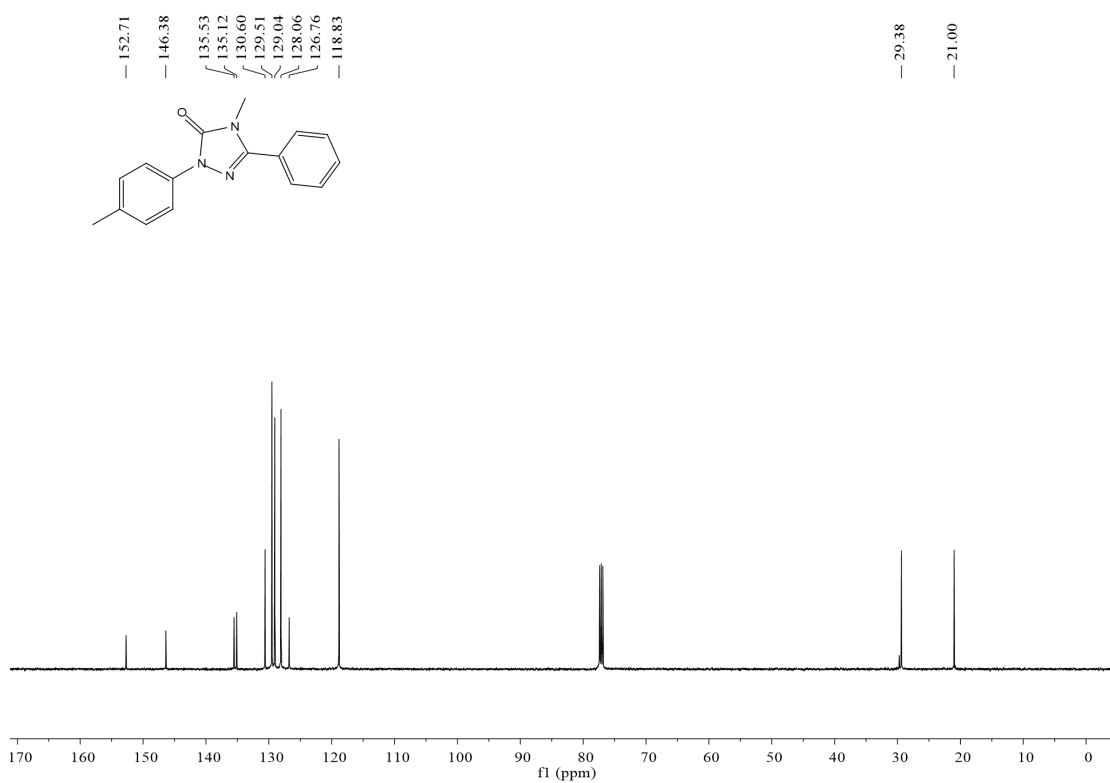

**<sup>1</sup>H and <sup>13</sup>C NMR spectra of  
4-Benzyl-5-phenyl-2-(p-tolyl)-2,4-dihydro-3H-1,2,4-triazol-3-one (4b) (500 MHz,  
CDCl<sub>3</sub>)**

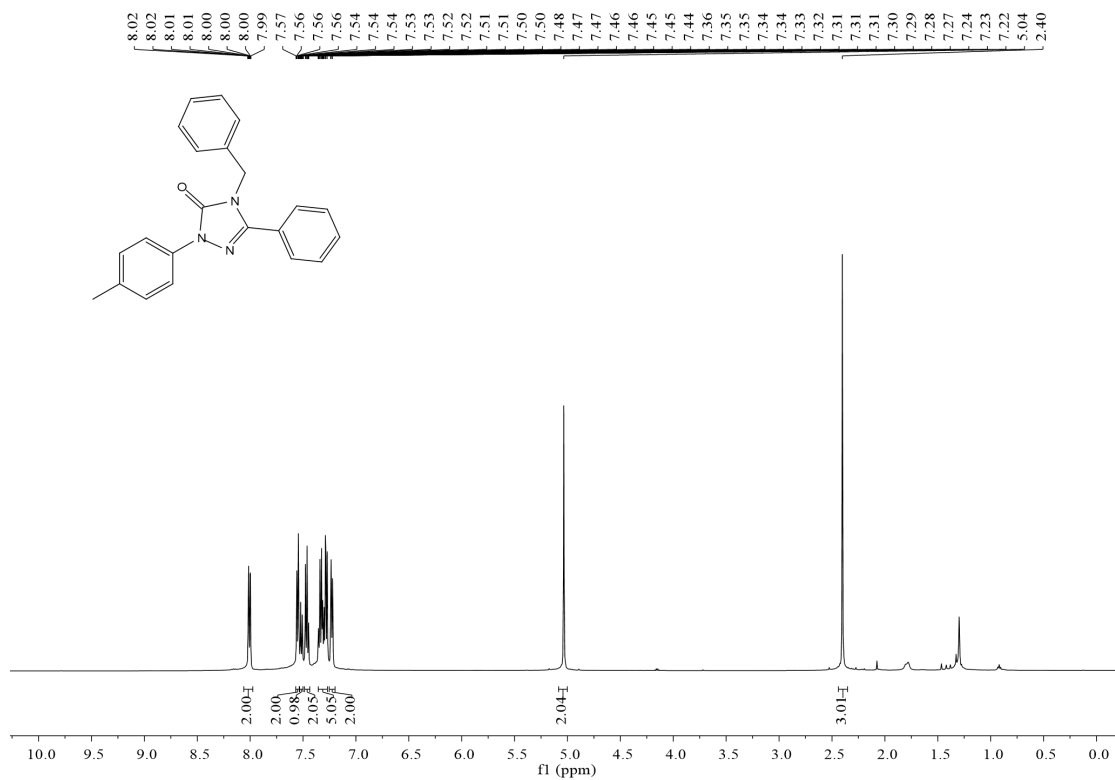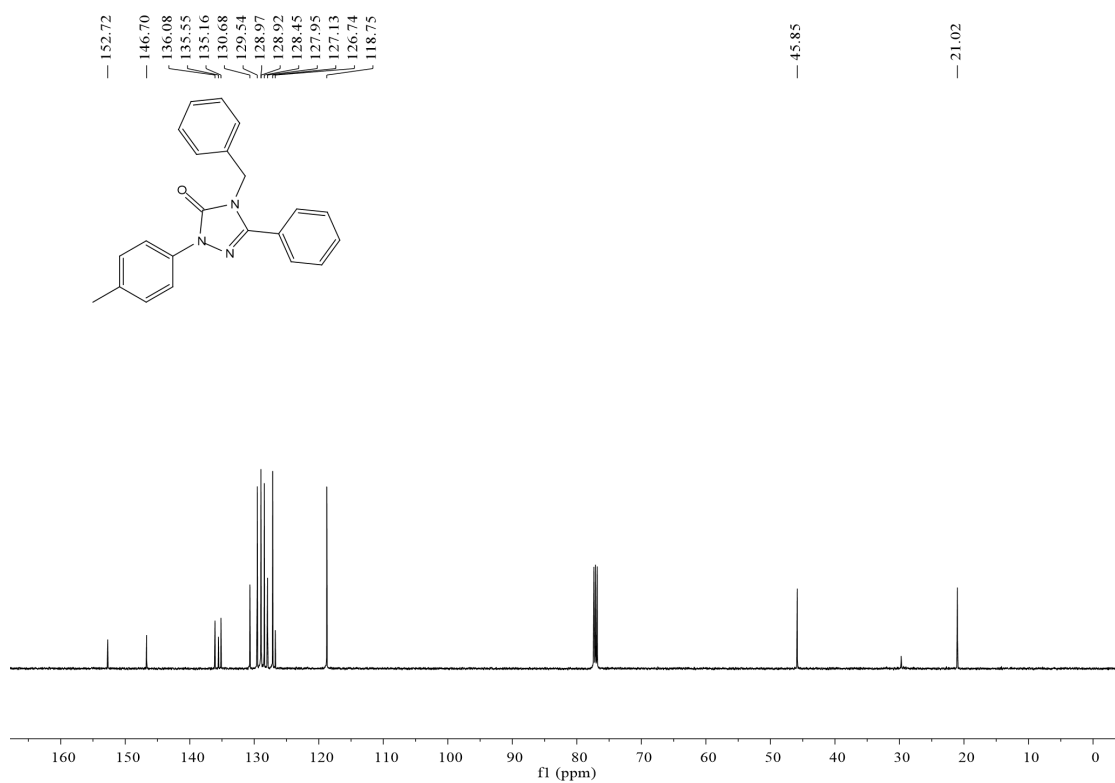

**$^1\text{H}$  and  $^{13}\text{C}$  NMR spectra of N-(p-tolylcarbamoyl)benzimidamide (5a) (500 MHz,  $\text{CDCl}_3$ )**

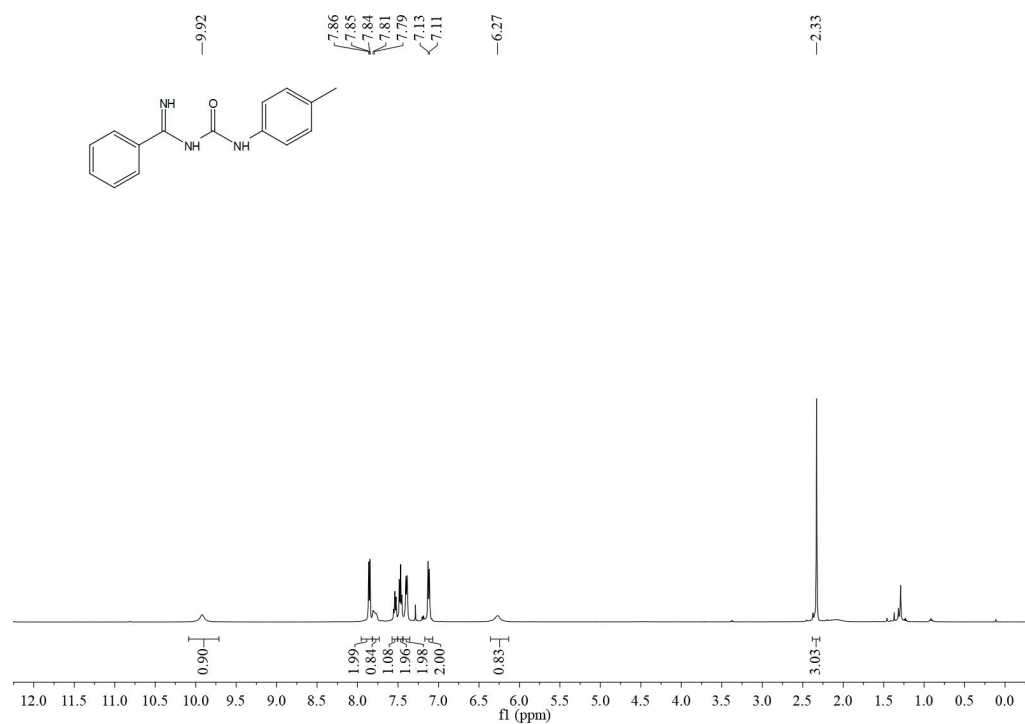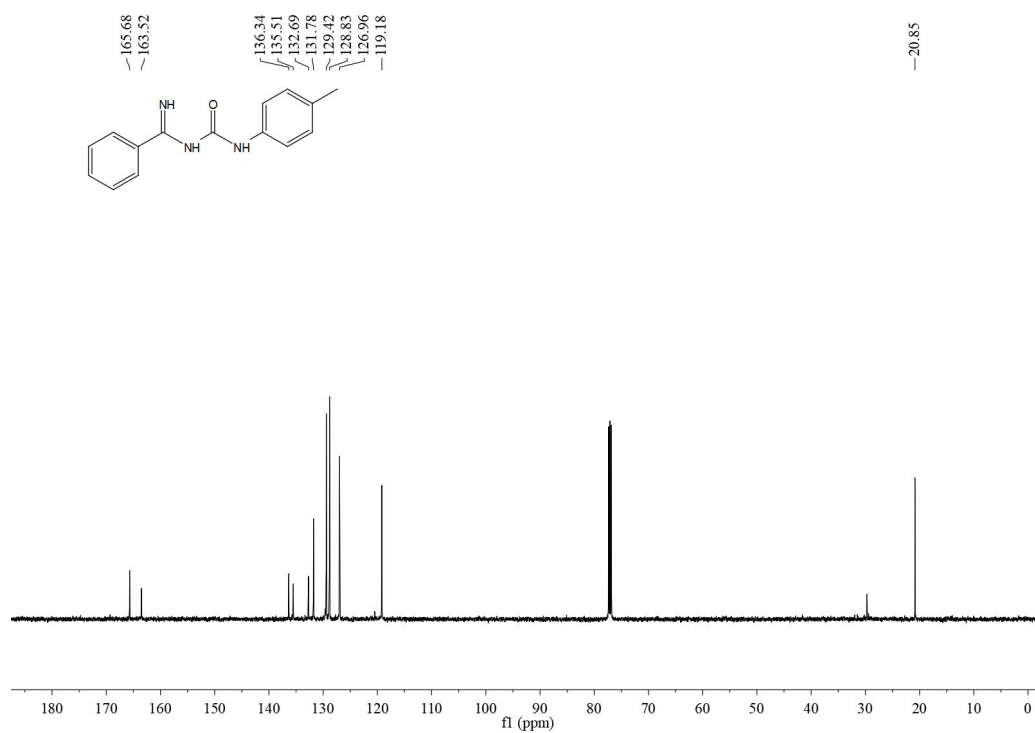

Supplement: d3qo01565c1.pdf [file d3qo01565c1.pdf]
